# Supplementary material for: Reactivity-dependent profiling of RNA 5-methylcytidine dioxygenases
Source: PubMed Central journal article supplement (PMC9296451; doi:10.1038/s41467-022-31876-2), 2022-07-19
Supplement: 41467_2022_31876_MOESM1_ESM.pdf [file 41467_2022_31876_MOESM1_ESM.pdf]

## SUPPLEMENTARY INFORMATION

### Reactivity-dependent profiling of RNA 5-methylcytidine dioxygenases

A. Emilia Arguello<sup>1</sup>, Ang Li<sup>1</sup>, Xuemeng Sun, Tanner W. Eggert, Elisabeth Mairhofer, and Ralph E. Kleiner\*

Department of Chemistry, Princeton University, Princeton, NJ 08544, USA

<sup>1</sup>These authors contributed equally.

\*rkleiner@princeton.edu

#### Table of Contents

|                                                                       |     |
|-----------------------------------------------------------------------|-----|
| Supplementary Figures 1-37                                            | S2  |
| Supplementary Tables 1-22                                             | S40 |
| Supplementary Note: Synthetic Protocols and Compound Characterization | S66 |
| References                                                            | S86 |

## Supplementary Figures

Adenosine (A)  
500 ng/mL to 5 ng/mL

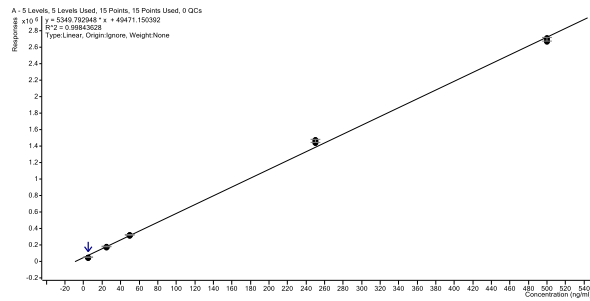

Cytosine (C)  
500 ng/mL to 5 ng/mL

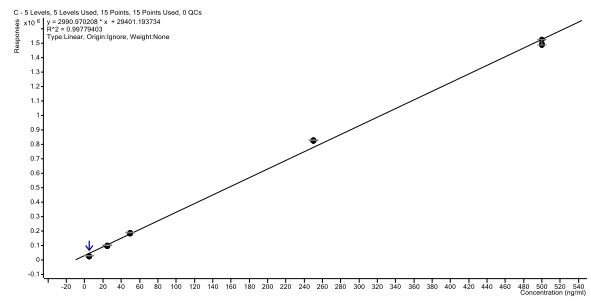

Guanosine (G)  
500 ng/mL to 5 ng/mL

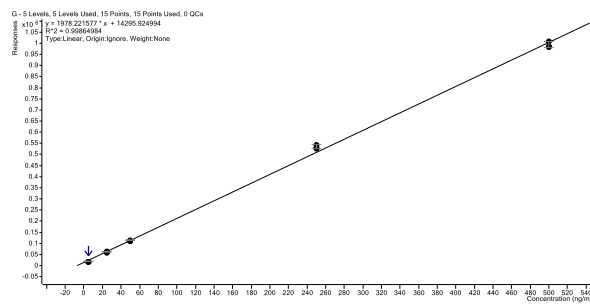

Uridine (U)  
500 ng/mL to 5 ng/mL

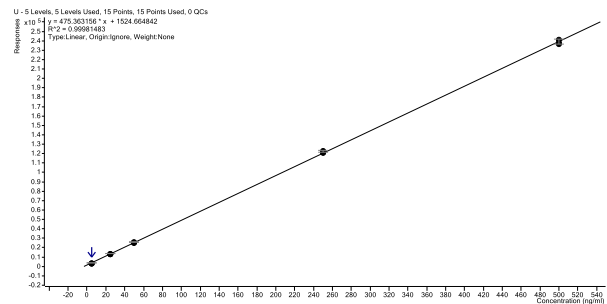

5-methylcytidine (m<sup>5</sup>C)  
500 ng/mL to 5 ng/mL

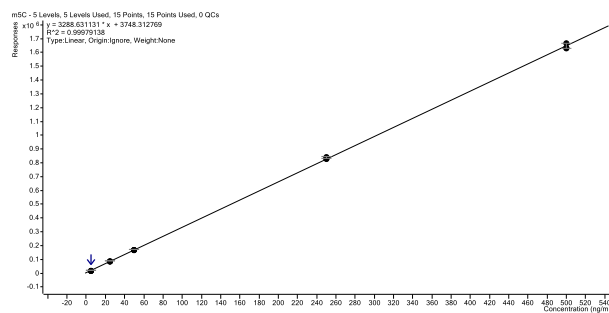

5-ethynylcytidine (5EC)  
1000 ng/mL to 10 ng/mL

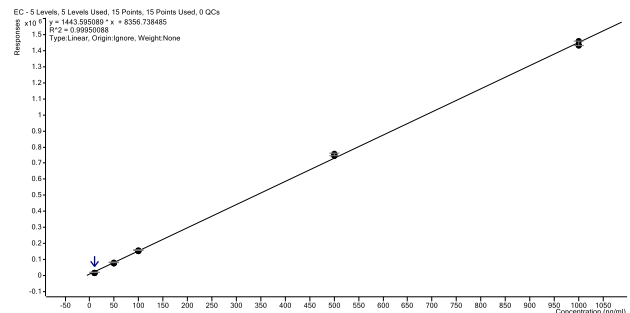

**Supplementary Figure 1.** Standard curves used for the LC-QQQ-MS quantification of 5-EC incorporation in WT total RNA. Two technical replicates for each standard were used to generate standard curves.

**A**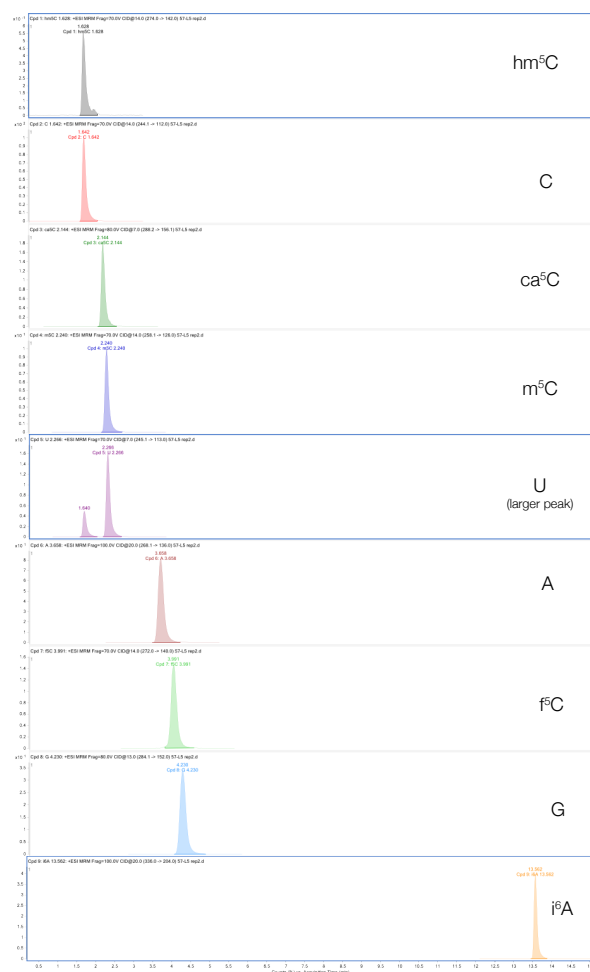**B**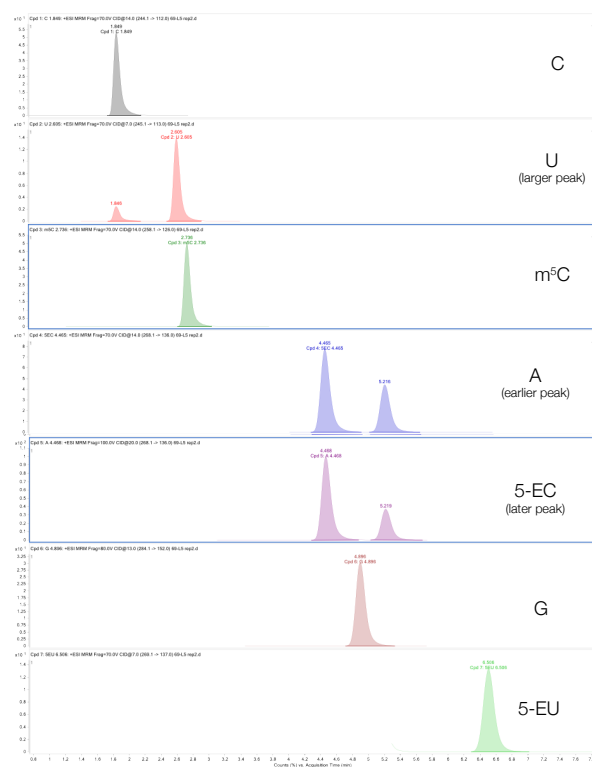

**Supplementary Figure 2.** Representative extracted ion chromatograms (EICs) from the nucleoside LC-MS/MS measurements. **(A)** EICs of standard mix in the measurement of m<sup>5</sup>C, hm<sup>5</sup>C, f<sup>5</sup>C, ca<sup>5</sup>C, and i<sup>6</sup>A in HEK293T WT and ALKBH1 KO total and small RNA. **(B)** EICs of standard mix in the measurement of 5-EC and 5-EU in total RNA of HEK293T WT after metabolic labeling. 5-EC and A have the same parent mass and MRM transition, but different elution times.

### 5-EC feeding cell viability

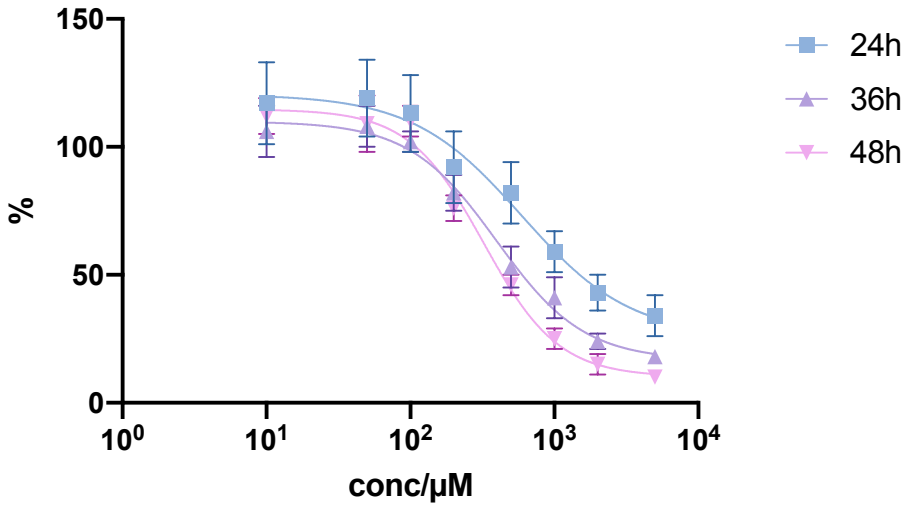

**Supplementary Figure 3.** Cell viability curves for 5-EC treatment of WT 293T cells. Three independent biological replicates were analyzed. Curves were fitted based on a 4-parameter dose-response equation using GraphPad Prism: IC<sub>50</sub> values for 24-hr treatment, 592.9 μM; for 36-hr treatment, 396.8 μM; for 48-hr treatment, 323 μM. Data represent mean ± SEM. Source data are provided as a Source Data file.

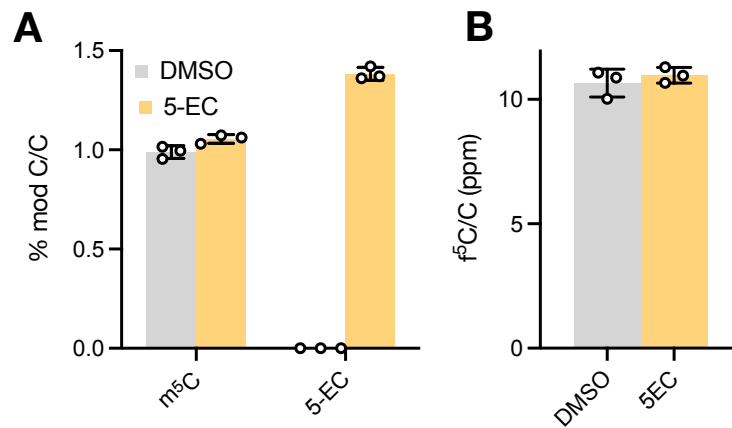

**Supplementary Figure 4.** 5-EC metabolic labeling does not affect endogenous levels of m<sup>5</sup>C or f<sup>5</sup>C. (A) Endogenous levels of m<sup>5</sup>C and levels of 5-EC incorporation in total RNA of WT 293T cells after overnight treatment with 1mM 5-EC or vehicle as measured by LC-MS/MS. (B) Endogenous levels of f<sup>5</sup>C in total RNA of WT 293T cells after overnight treatment with 1mM 5-EC or vehicle as measured by LC-MS/MS. For (A) and (B), three independent biological replicates were analyzed. Data represent mean values  $\pm$  s.d. Source data are provided as a Source Data file.

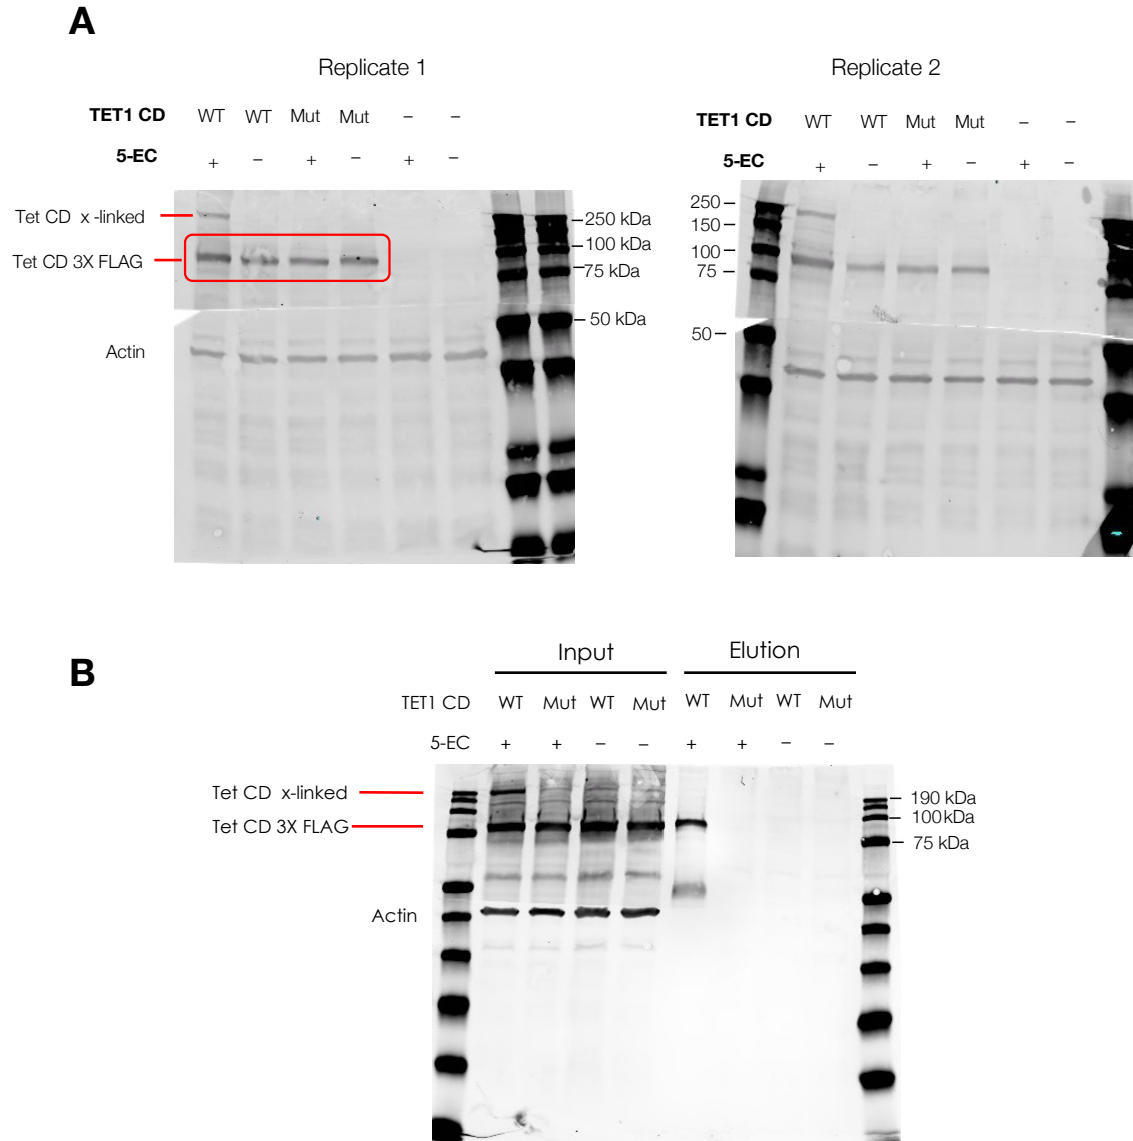

**Supplementary Figure 5.** 5-EC RNA crosslinks exclusively with catalytically active TET1(CD). **(A)** Wild-type (WT) or an inactive mutant (Mut) pcDNA5-TET1(CD) was transfected into WT 293T, followed by treatment with 5-EC or vehicle for 16 hrs. Cells were lysed, and the lysate was separated by SDS-PAGE. Expression of the construct and the presence of a higher-running RNA-cross-linked band were detected by anti-FLAG western blot. Actin blotting was used as a loading control. **(B)** 5-EC mediated cross-linking and recovery of TET1(CD) WT. 3X-FLAG-TET1(CD) WT or 3X-FLAG TET1(CD) Mut were overexpressed in WT 293T by transient transfection followed by treatment with 1 mM 5-EC for 16 hr. Cells were lysed, and poly-A RNA was isolated via oligo-dT pulldown. RNA was digested and protein was detected by SDS-PAGE and anti-FLAG western blot. For (A) and (B), experiments were repeated three times independently with similar results.

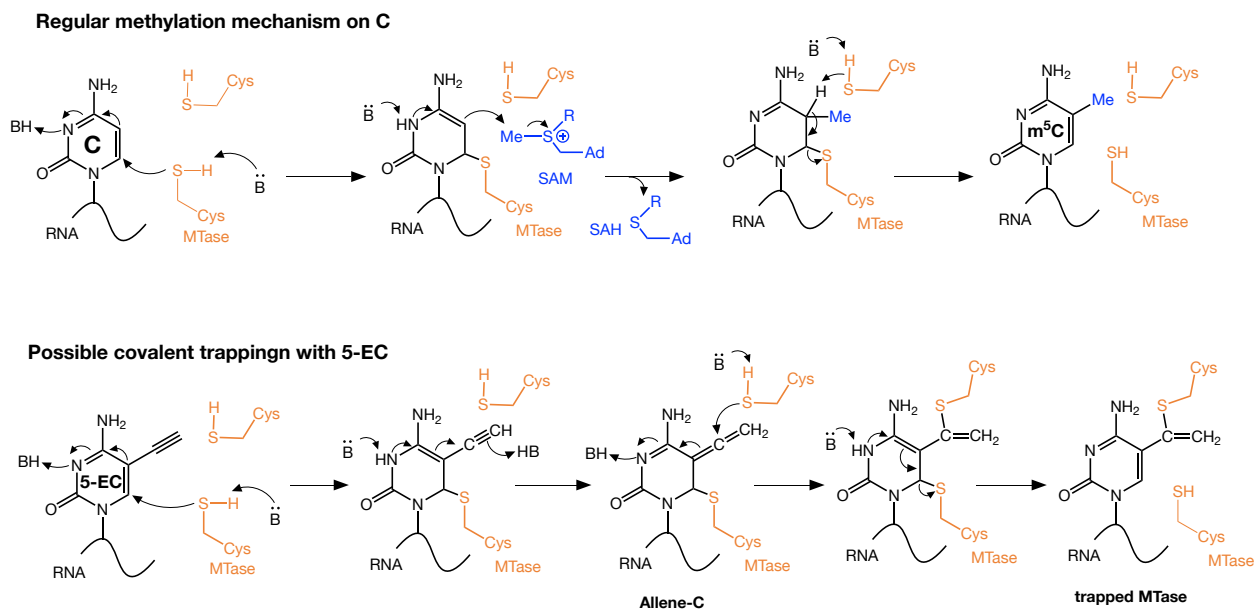

**Supplementary Figure 6.** Mechanism of methylation at C5 position of cytidine (C) and possible covalent capture with a 5-alkynyl C analog. The proposed mechanism involves the methyltransferase's (orange) two cysteine residues to mediate the transfer of a methyl group from SAM (blue). First, nucleophilic attack of a catalytic Cys residue on the C6 position of C forms an enzyme-bound intermediate, and a second Cys residue mediates beta-elimination after C5 methylation with SAM. With 5-ethynyl cytidine, the first nucleophilic attack allows for a rearrangement of the alkyne to a thiol-reactive allene, which then covalently traps the second cysteine residue.

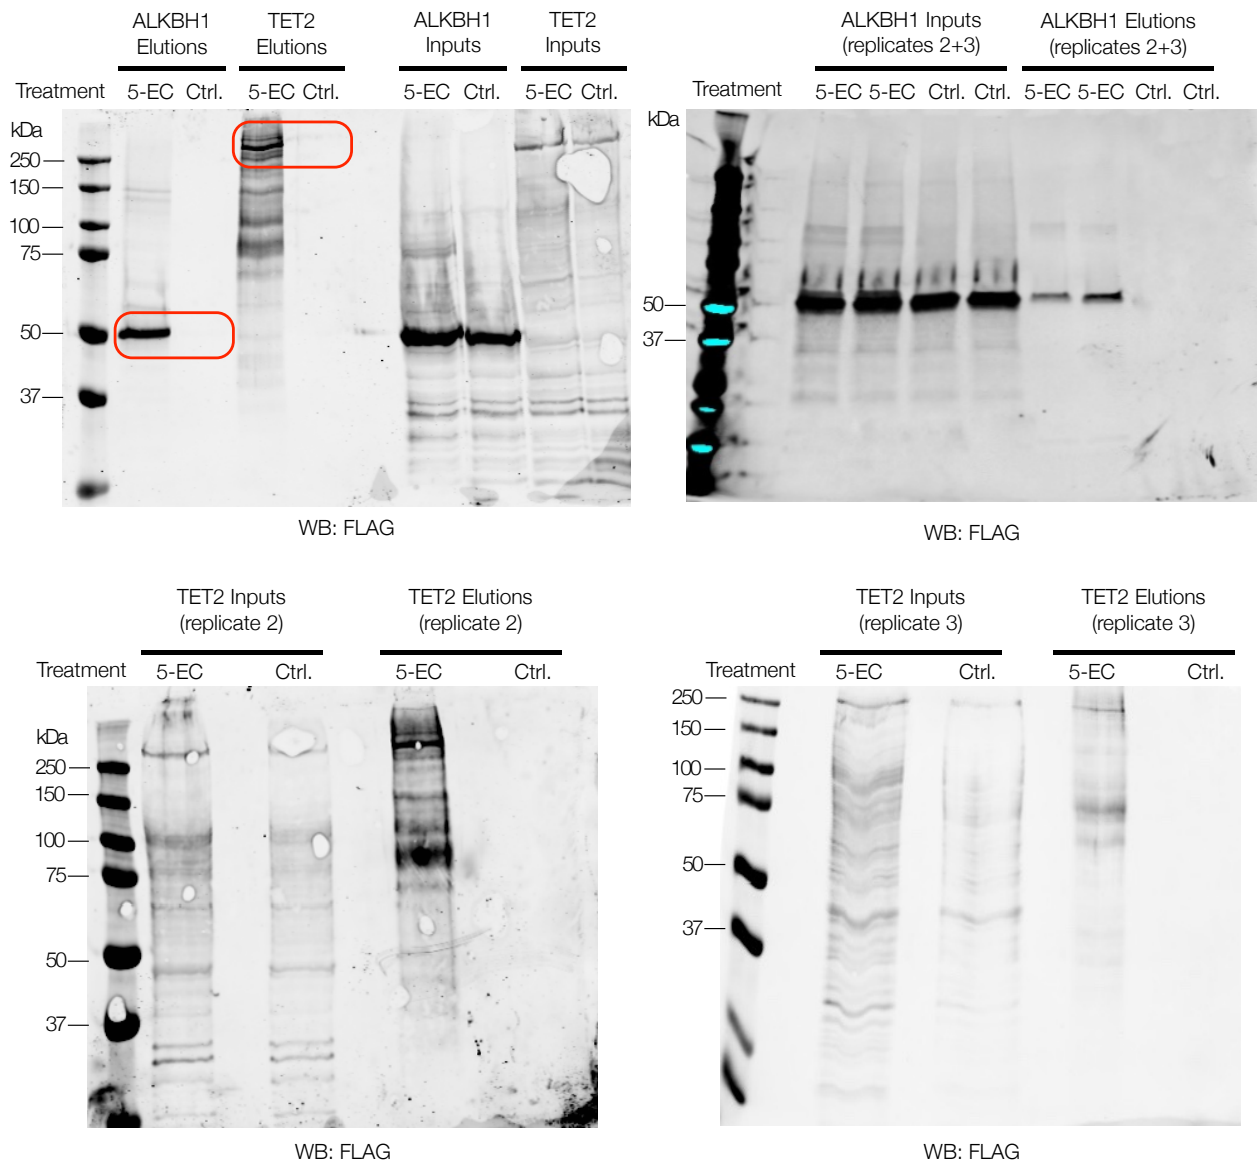

**Supplementary Figure 7.** 5-EC mediated crosslinking and recovery of ALKBH1 and TET2. Full western blot data for Fig 3C in main text. PolyA RNA isolation was performed as in Supplementary Fig. 5 with the corresponding Flp-In cell line. Highlighted regions are presented in the main text. The experiments were repeated three times independently with similar results.



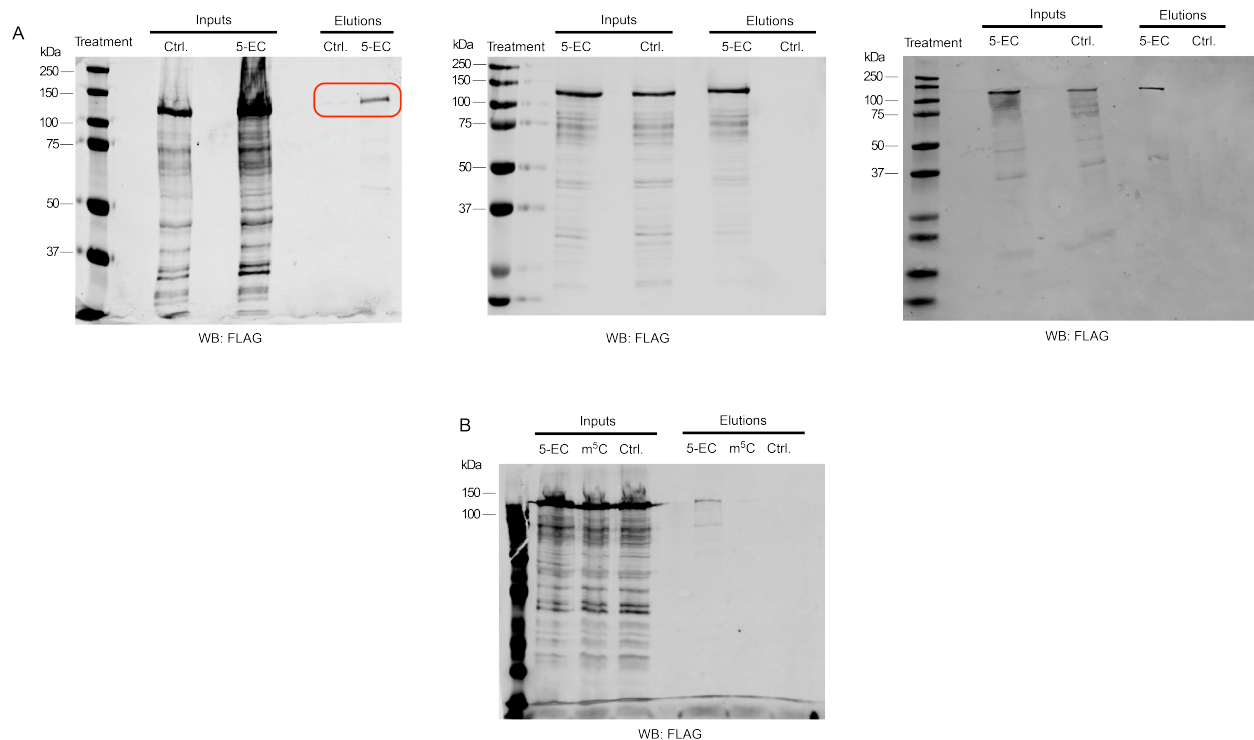

**Supplementary Figure 8. (A)** 5-EC mediated crosslinking and recovery of MPP8. Full western blot data for Fig 3C in main text. PolyA RNA isolation was performed as in Supplementary Fig. 5 with the corresponding Flp-In cell line. Highlighted regions are presented in the main text. **(B)** 5-EC, but not 5-methylcytidine ( $m^5C$ ), mediates crosslinking of MPP8 to mRNA. The experiment was performed as in Supplementary Fig. 5 with the corresponding Flp-In cell line fed with 1 mM  $m^5C$ . For (A) and (B), the experiments were repeated three times independently with similar results.

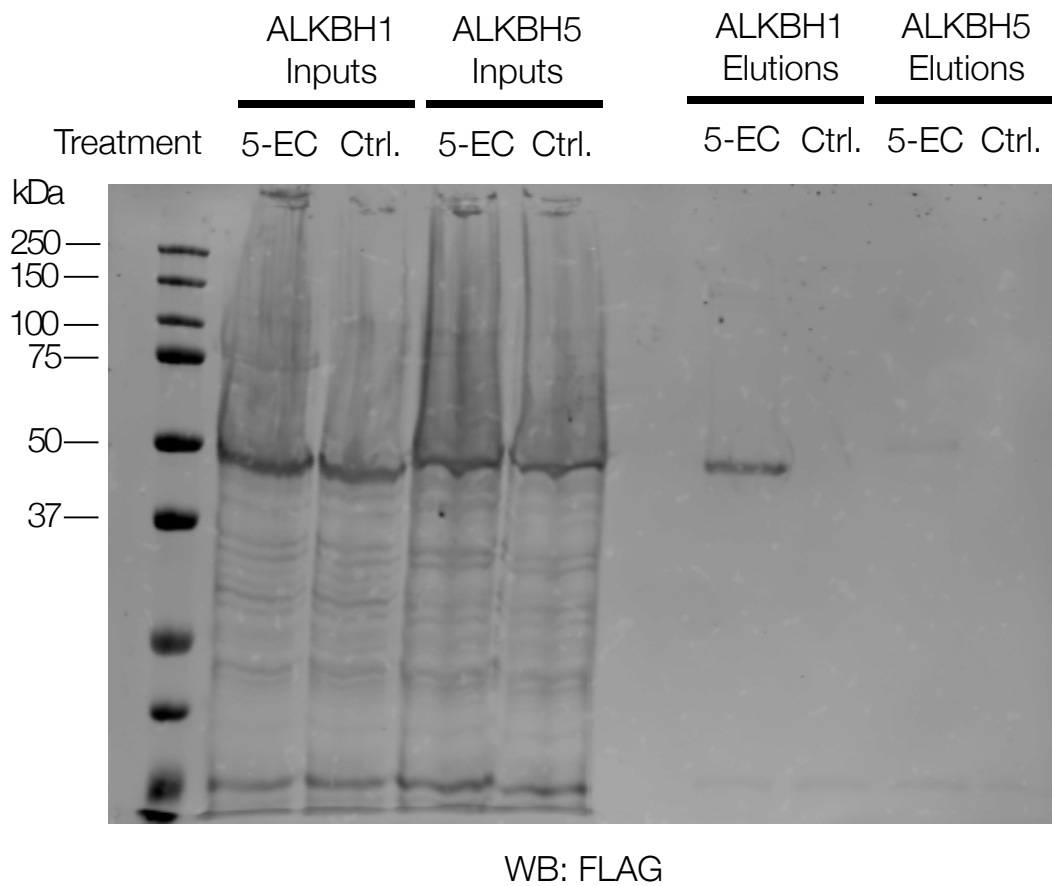

**Supplementary Figure 9.** 5-EC-containing RNA crosslinks and enriches ALKBH1 over ALKBH5. The experiment was performed as in Supplementary Fig. 5 with the corresponding Flp-In cell lines. The experiments were repeated three times independently with similar results.

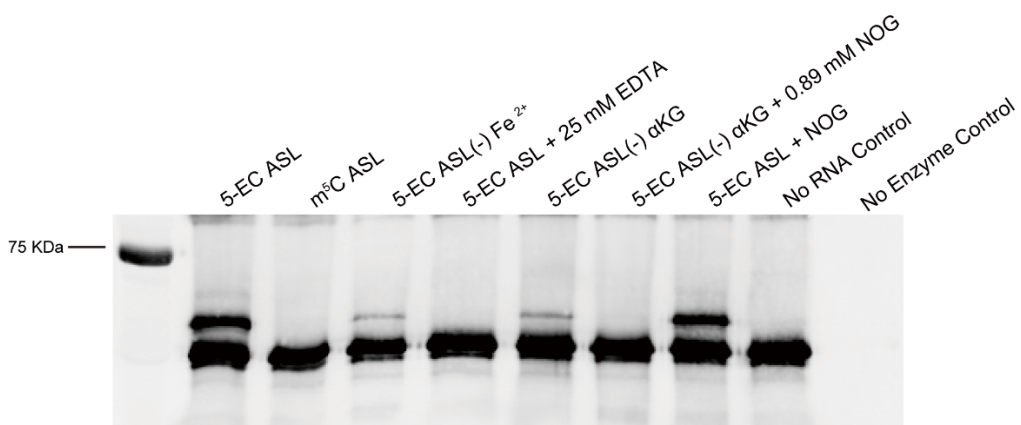

**Supplementary Figure 10.** *In-vitro* crosslinking of recombinant ALKBH1 and 5-EC-containing tRNA<sup>iMet</sup> ASL (oligo 1) or m<sup>5</sup>C-containing tRNA<sup>iMet</sup> ASL (oligo 2). A higher-running band suggests crosslinked protein-RNA adduct. RNA, enzyme, and cofactors were incubated as described in Methods. The required cofactors Fe<sup>2+</sup> and alpha-ketoglutarate (α-KG) are included in all reactions unless otherwise indicated. NOG = N-oxalyl glycine, an inhibitor of α-KG-dependent enzymes. The experiments were repeated three times independently with similar results. Source data are provided as a Source Data file.

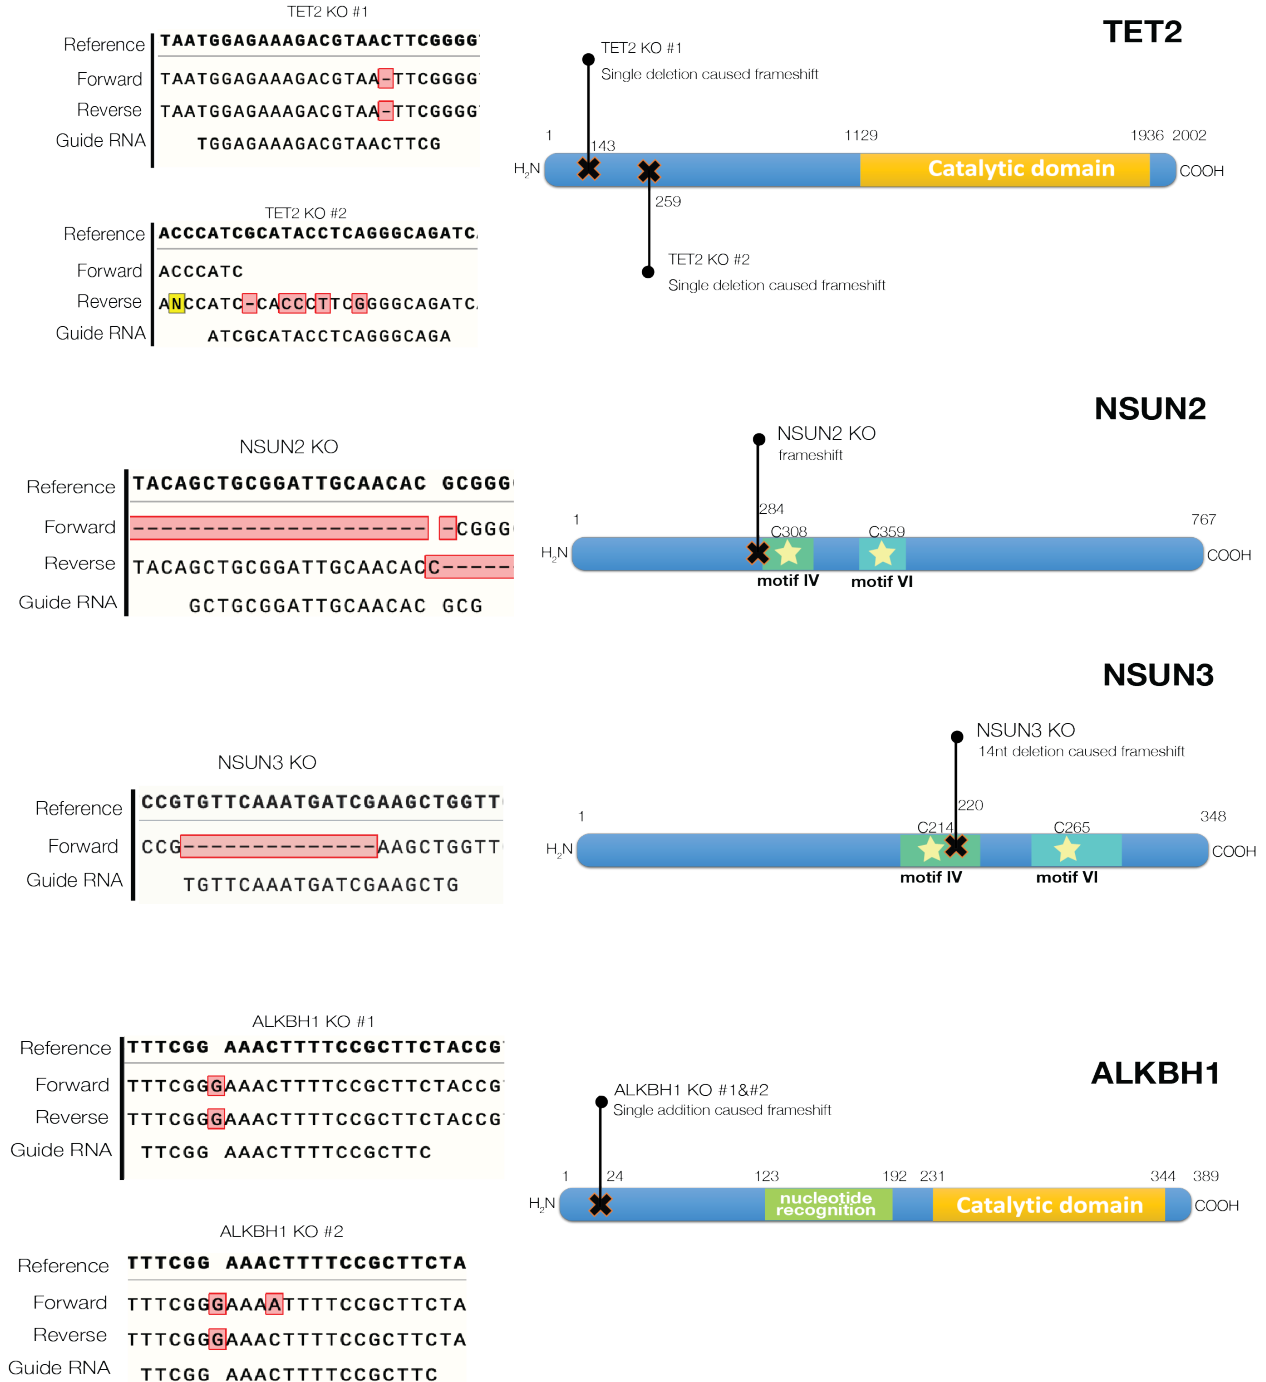

**Supplementary Figure 11.** Sanger sequencing characterizations of ALKBH1, TET2, NSUN2, and NSUN3 CRISPR knockouts. Cells were harvested, and crude genomic DNA was extracted for genomic PCR and analyzed by Sanger sequencing. Alignment was performed in Snappgene. KO were chosen if insertions or deletions occurred at or near the editing site (i.e., near the landing site for the guide RNA). Guide RNA for ALKBH1: bases 68-87 of cDNA. Guide RNAs for TET2: bases 414-435 and 774-793 of cDNA.

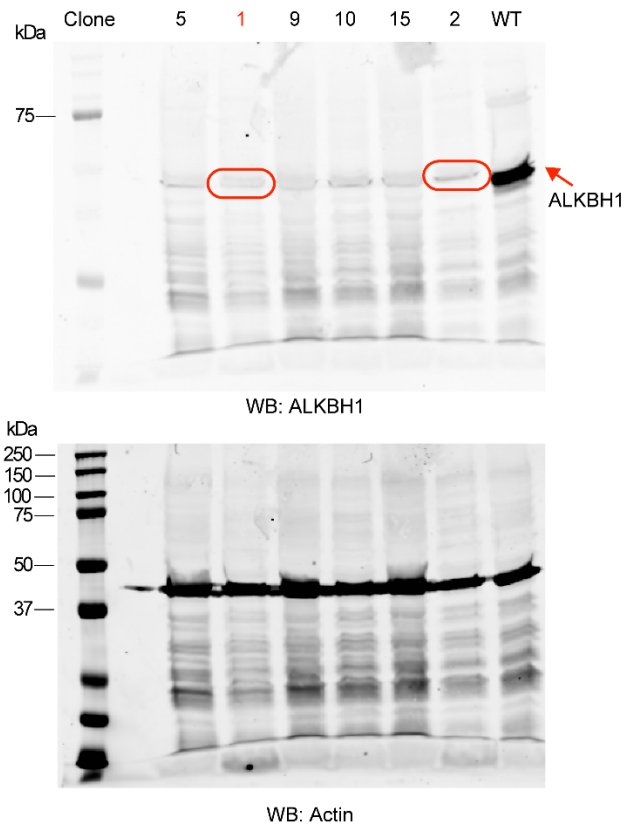

**Supplementary Figure 12.** Western blot validation of ALKBH1 KO cells. Circled in red are the clones used in LC-MS/MS quantification experiments. The experiments were repeated three times independently with similar results.

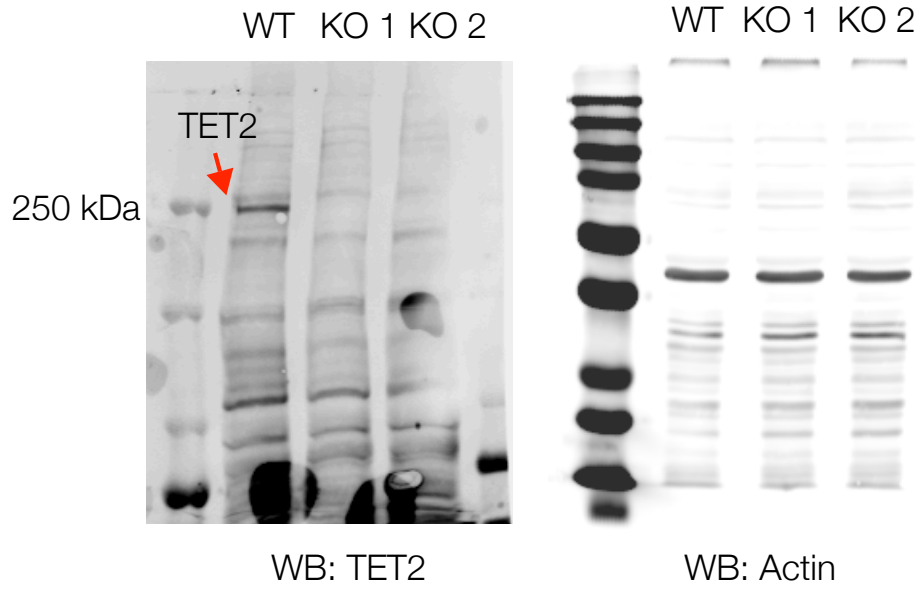

**Supplementary Figure 13.** Western blot validation of TET2 KO cells. The experiments were repeated three times independently with similar results.

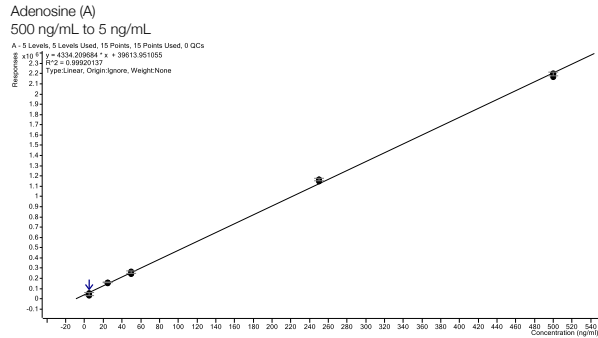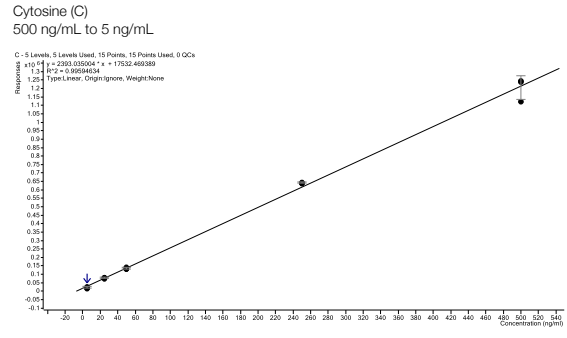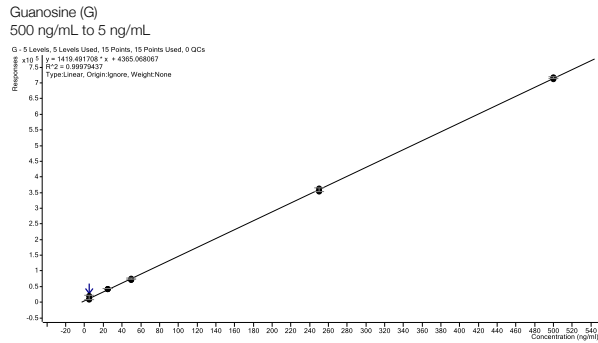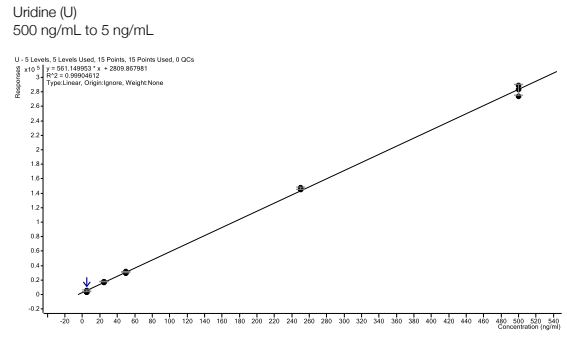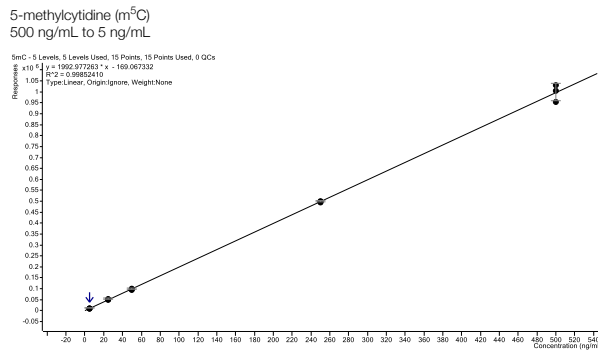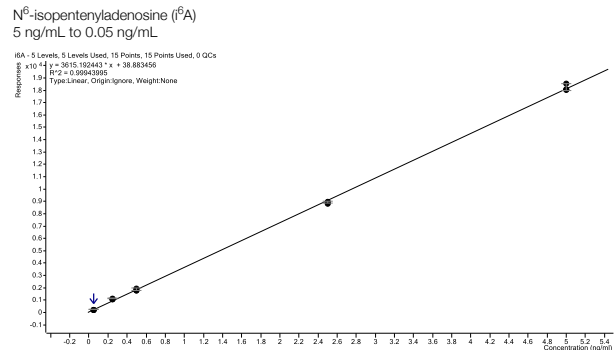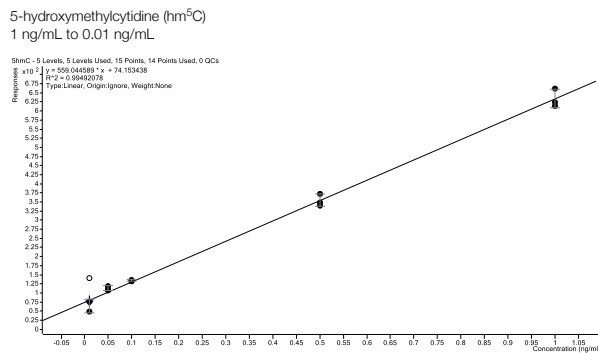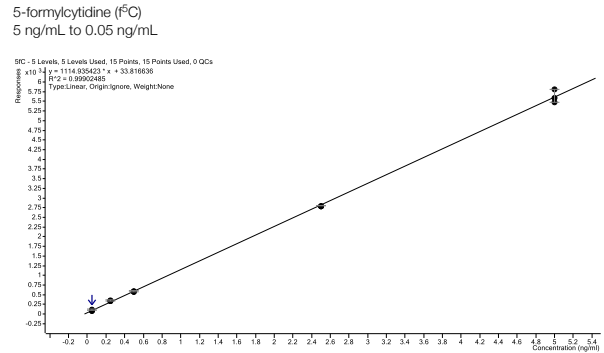

**Supplementary Figure 14.** Standard curves used for the LC-QQQ-MS quantification of hm<sup>5</sup>C and f<sup>5</sup>C in RNA from WT and ALKBH1/TET2/NSUN2/NSUN3 KO cells. Two technical replicates for each standard were used to generate standard curves.

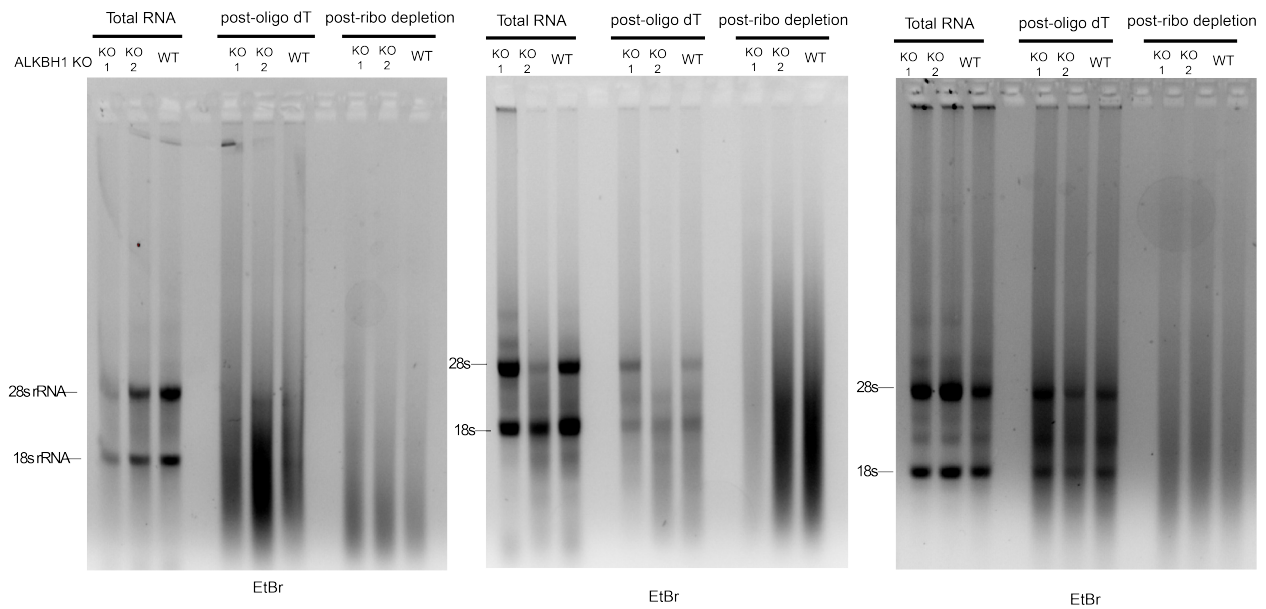

**Supplementary Figure 15.** Enrichment of mRNA from total mammalian RNA in ALKBH1 KO cells (biological triplicates). Extracted total RNA was first subjected to an oligo(dT) pulldown to isolate poly(A)RNA, which was further enriched by depleting ribosomal and small RNA fragments that co-purified during the pulldown. The quality at each step was checked by agarose gel electrophoresis.



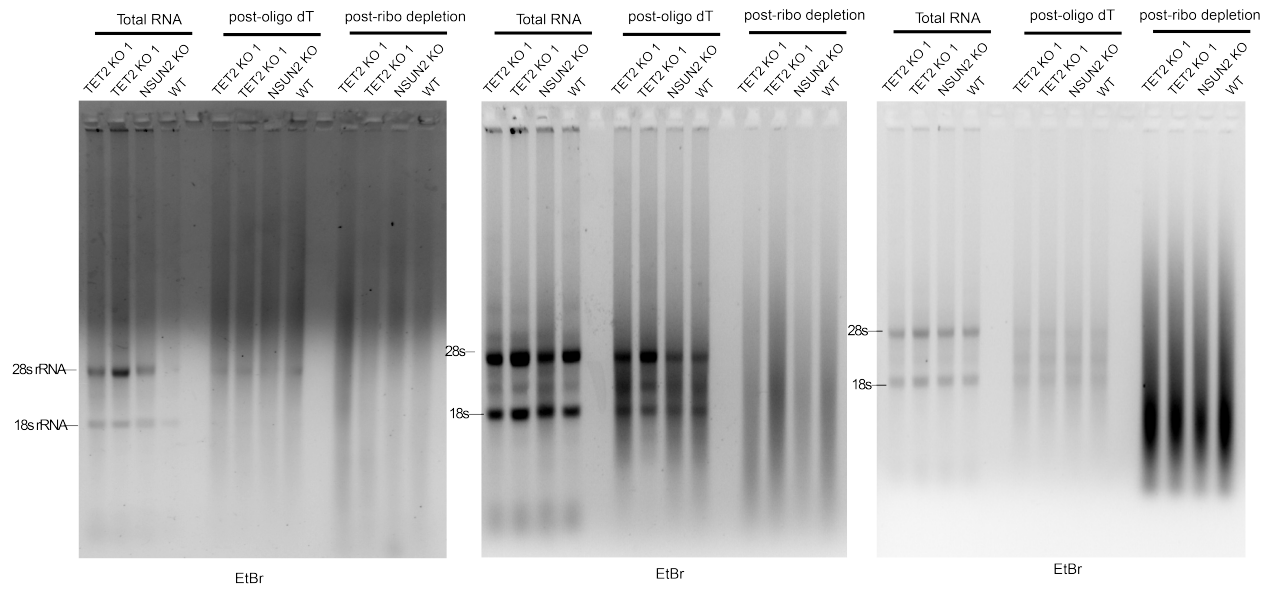

**Supplementary Figure 16.** Enrichment of mRNA from total mammalian RNA in TET2 and NSUN2 KO Cells (biological triplicates). Extracted total RNA was first subjected to an oligo(dT) pulldown to isolate poly(A)RNA, which was further enriched by depleting ribosomal and small RNA fragments that co-purified during the pulldown. The quality at each step was checked by agarose gel electrophoresis.

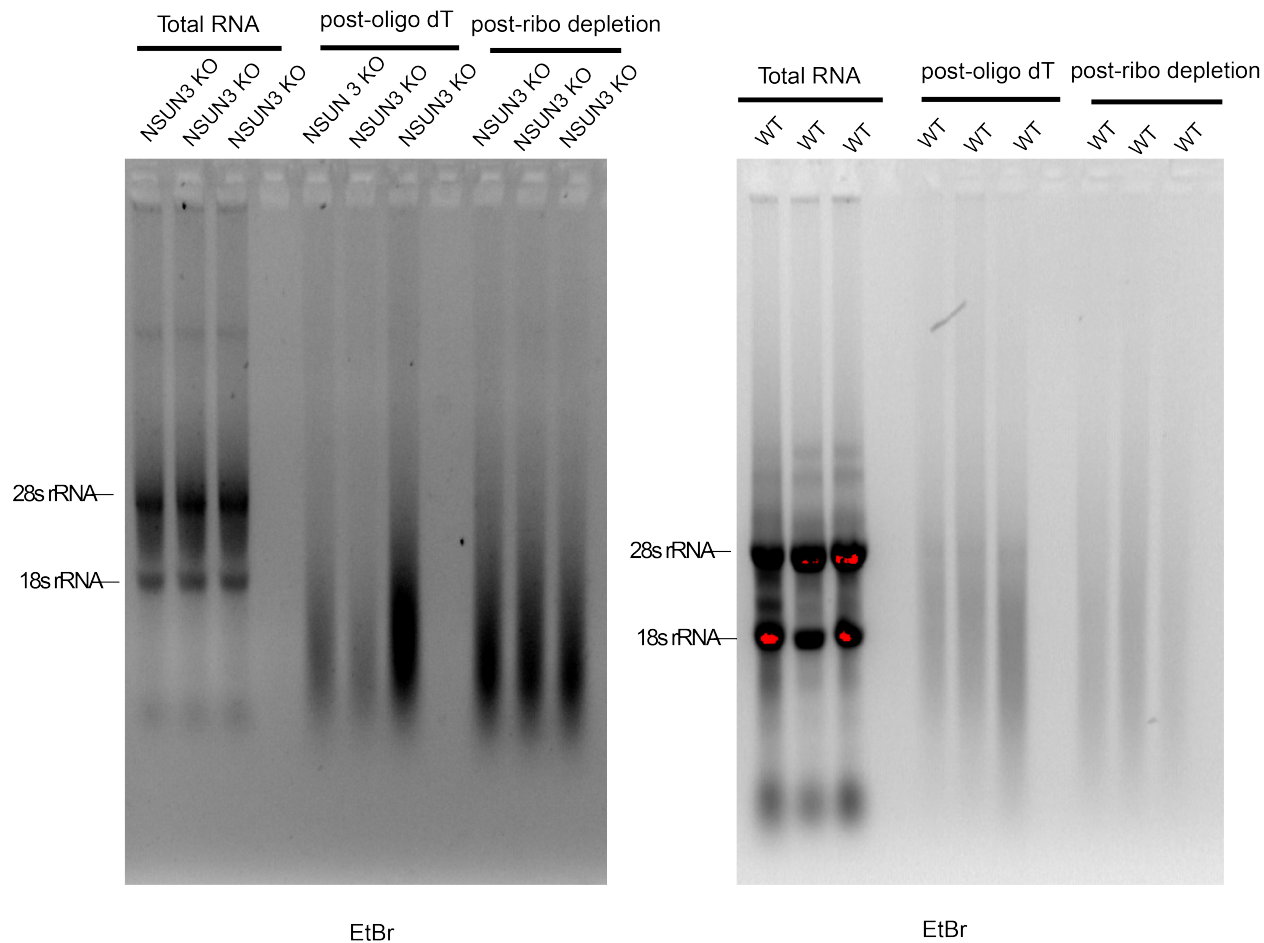

**Supplementary Figure 17.** Enrichment of mRNA from total mammalian RNA in NSUN3 KO cells (biological triplicates). Extracted total RNA was first subjected to an oligo-dT pulldown to isolate polyA RNA, which was further enriched by depleting ribosomal and small RNA fragments that co-purified during the pulldown. The quality at each step was checked by agarose gel electrophoresis.

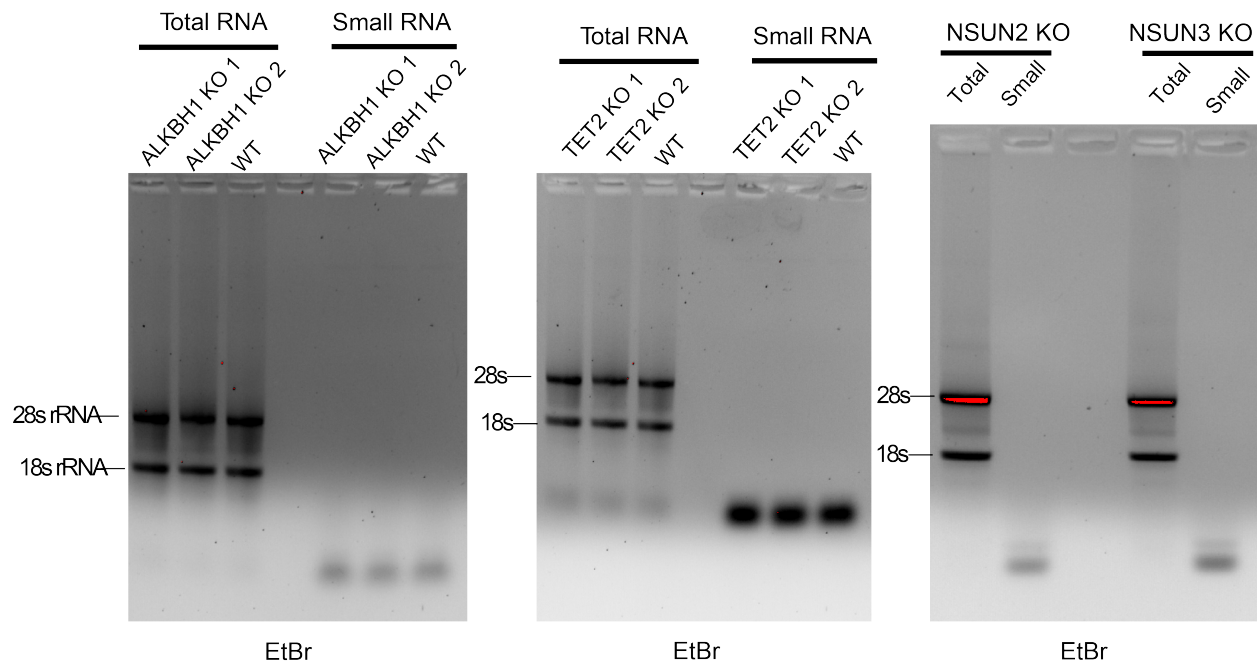

**Supplementary Figure 18.** Enrichment of small RNA from total mammalian RNA in ALKBH1, NSUN2, NSUN3, and TET2 KO Cells. Extracted total RNA was enriched for small RNA following the protocol for small RNA isolation from Zymo Clean and Concentrator-5. Each extraction was performed in triplicate, with comparable results.

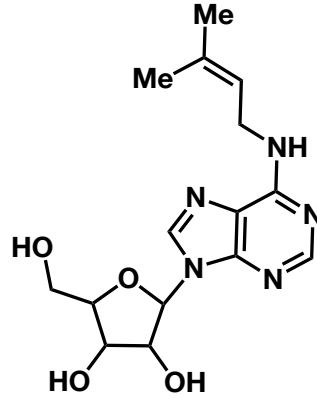

$N^6$ -isopentenyladenosine ( $i^6A$ )

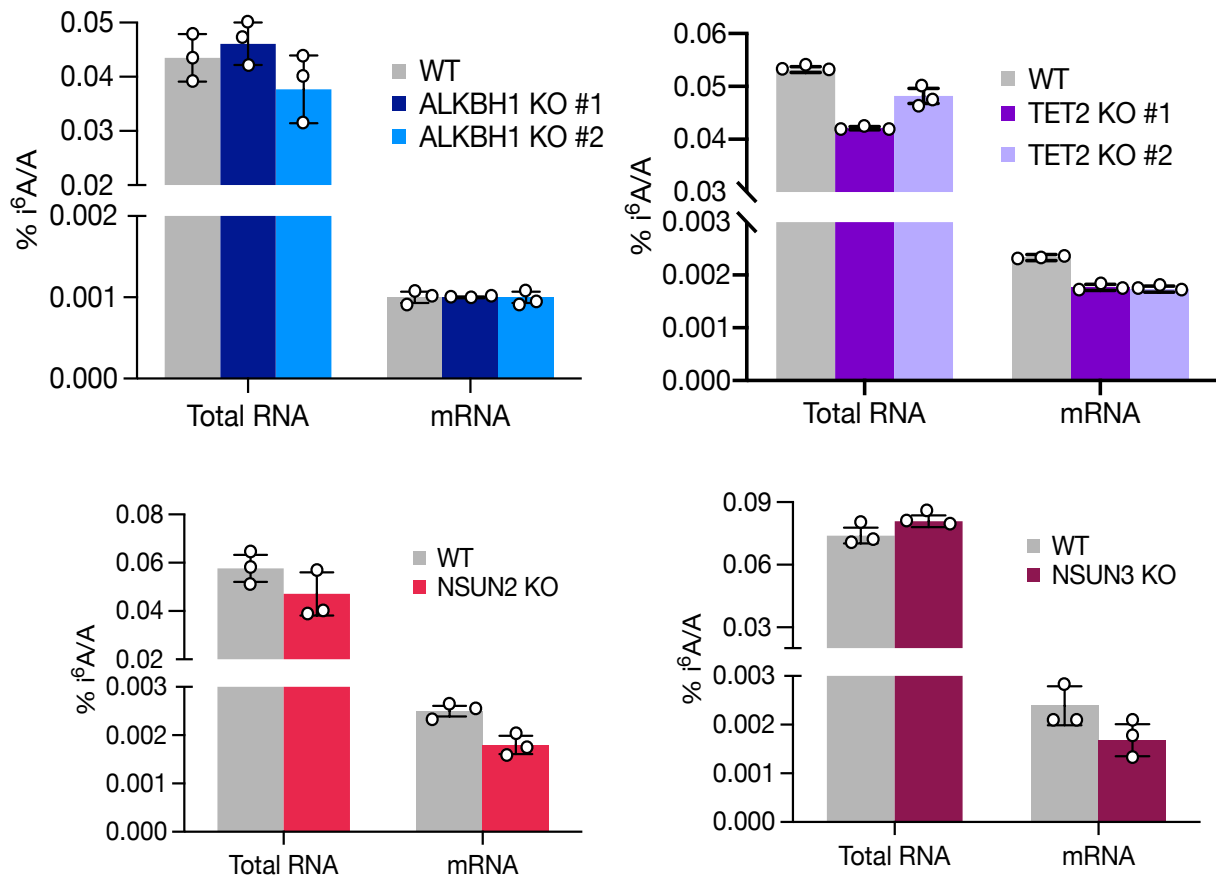

**Supplementary Figure 19.** Depletion of  $i^6A$  in mammalian mRNA from WT 293T and ALKBH1/TET2/NSUN2/NSUN3 KO cells. RNA samples were extracted and processed as in Supplementary Fig. 10, digested, dephosphorylated, and analyzed by LC-QQQ-MS. Levels in total and mRNA are consistent with literature reports.<sup>1</sup>  $i^6A$  is present in mRNA at levels at least 20-fold lower than in total RNA. Three independent biological replicates were analyzed. Data represent mean values  $\pm$  s.d. Source data are provided as a Source Data file.

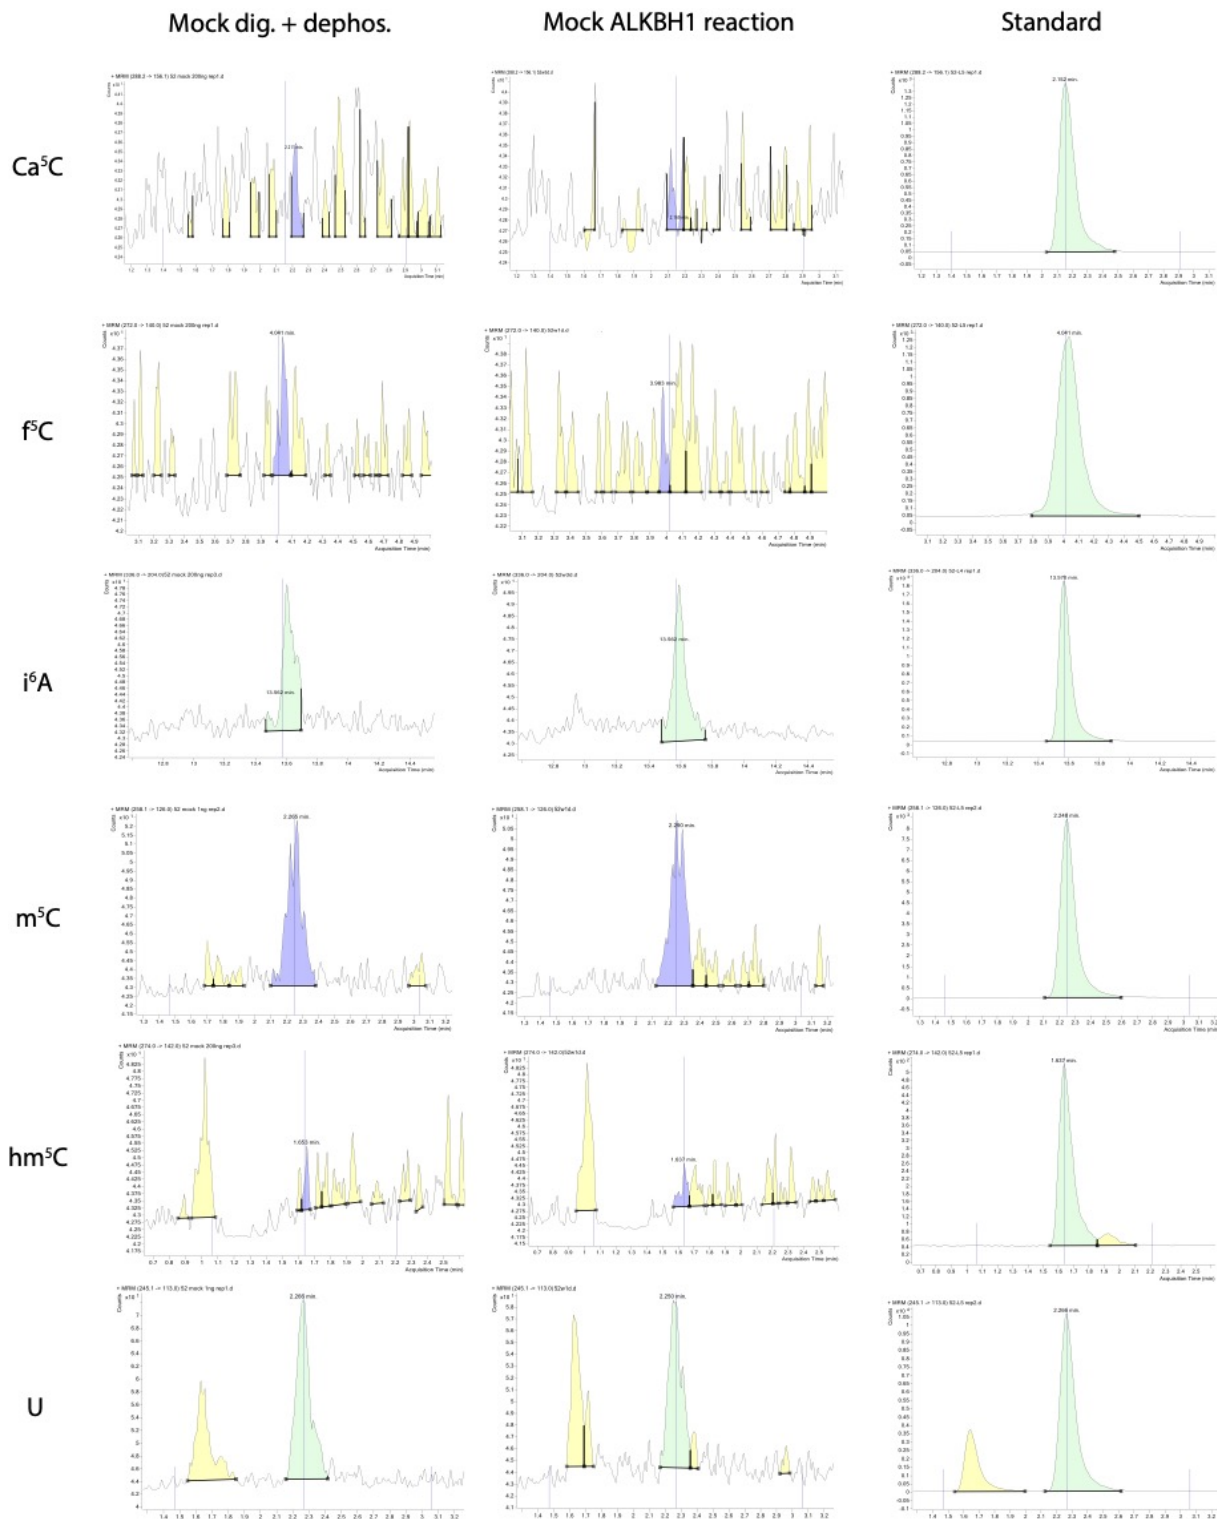

**Supplementary Figure 20.** Levels of several modified and unmodified nucleosides that arise from mock (no RNA) enzymatic digestion and dephosphorylation (left column) or ALKBH1 in vitro oxidation (middle column). Chromatographic traces for the standards are included for reference (right column). In all cases, nucleoside levels are negligible or completely inexistent.

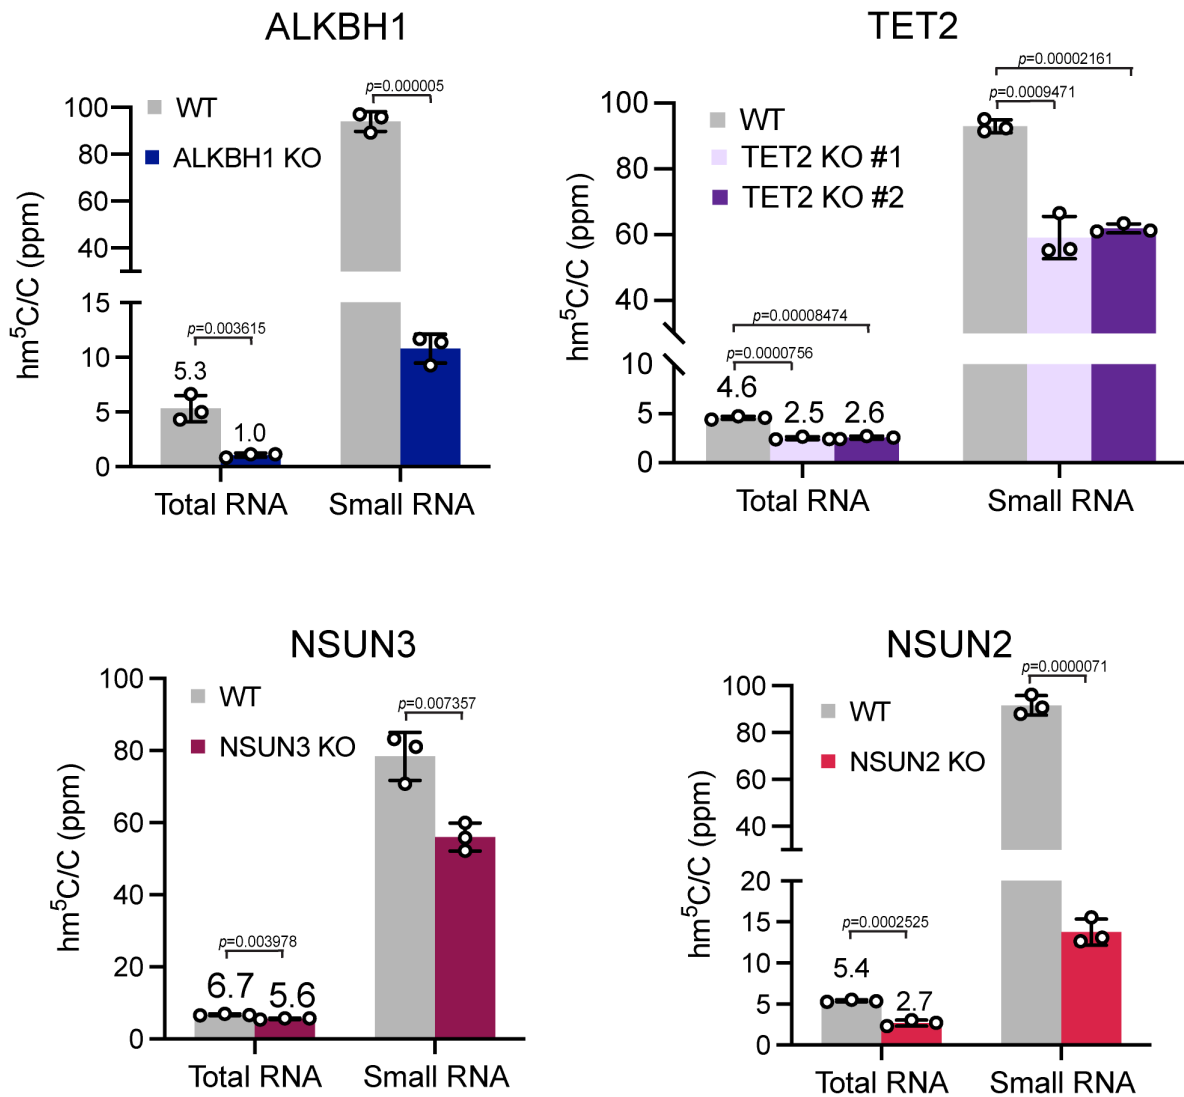

**Supplementary Figure 21.** Quantification of hm<sup>5</sup>C levels in total and small RNA of WT 293T cells and various knockouts. Three independent biological replicates were analyzed, and data represent mean values ± s.d. An unpaired t-test (two-tailed) was used to measure the statistical significance \*p < 0.05, \*\* p < 0.01, \*\*\* p < 0.001, \*\*\*\* p < 0.0001. Source data are provided as a Source Data file.

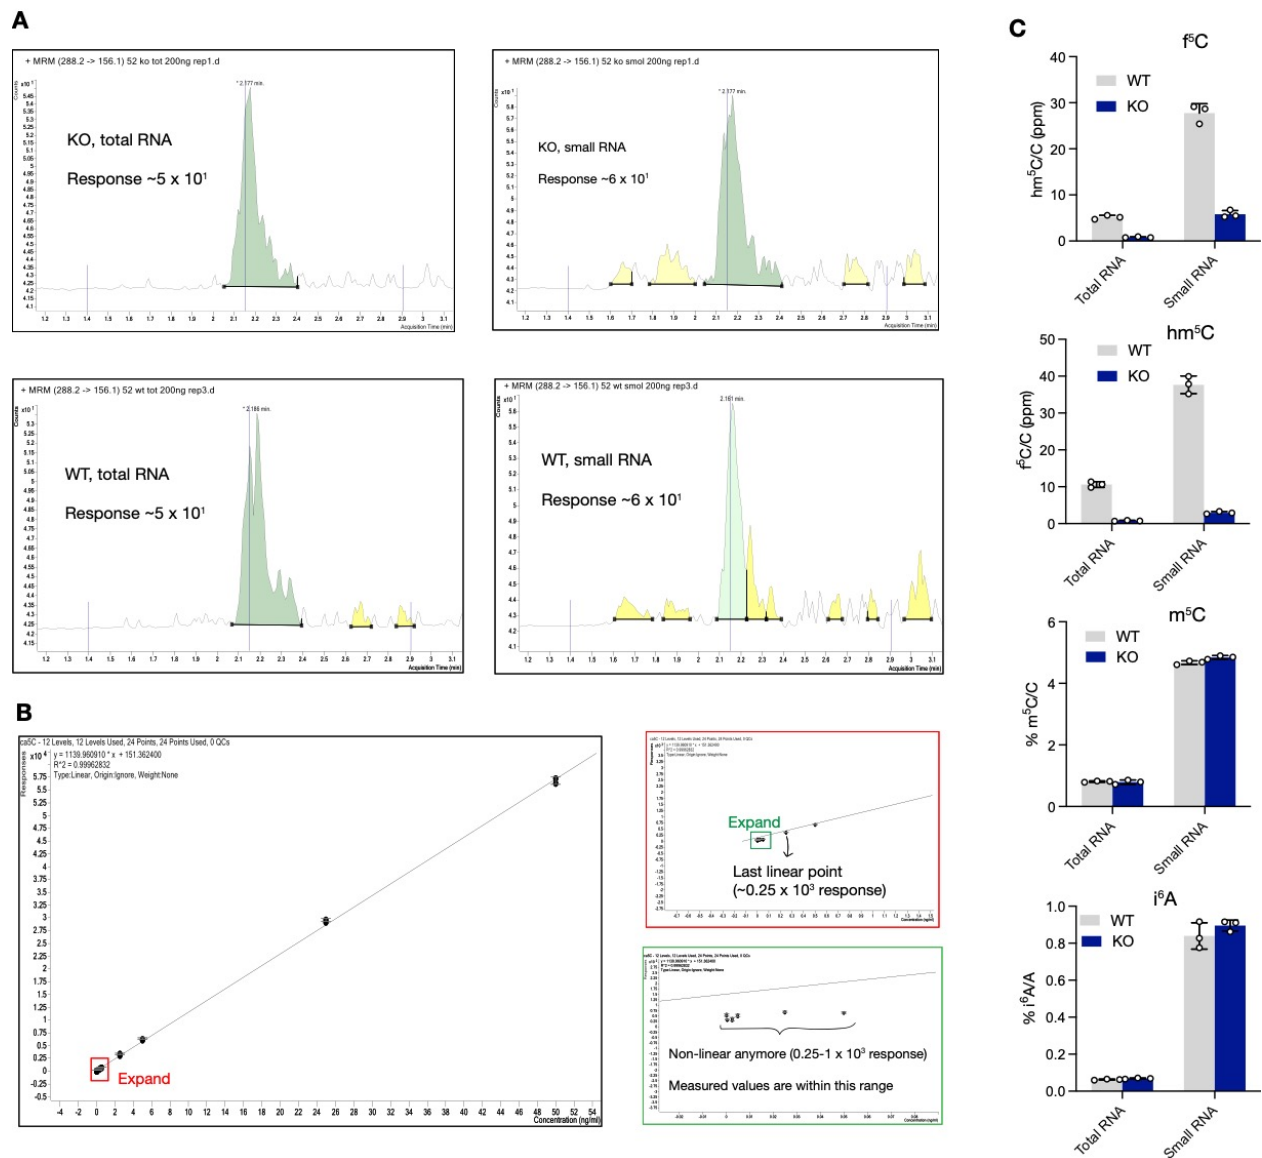

**Supplementary Figure 22.** 5-carboxycytidine ( $ca^5C$ ) is not formed in cells by ALKBH1. **(A)** Raw signals for  $ca^5C$  in representative WT and ALKBH1 total and small RNA samples (200 ng) as quantified by LC-MS/MS. **(B)** Calibration curve for  $ca^5C$  ranging from 50 to 0.00025 ng/mL. Portions of the curve are expanded to highlight the non-linear nature below 0.25 ng/mL. **(C)** Levels of other modifications ( $f^5C$ ,  $hm^5C$ ,  $i^6A$ ,  $m^5C$ ) in the same samples remain consistent with values reported in this and other manuscripts. Three independent biological replicates were analyzed. Data represent mean values  $\pm$  s.d. Source data are provided as a Source Data file.

NSUN2 KO - Total and Small RNA

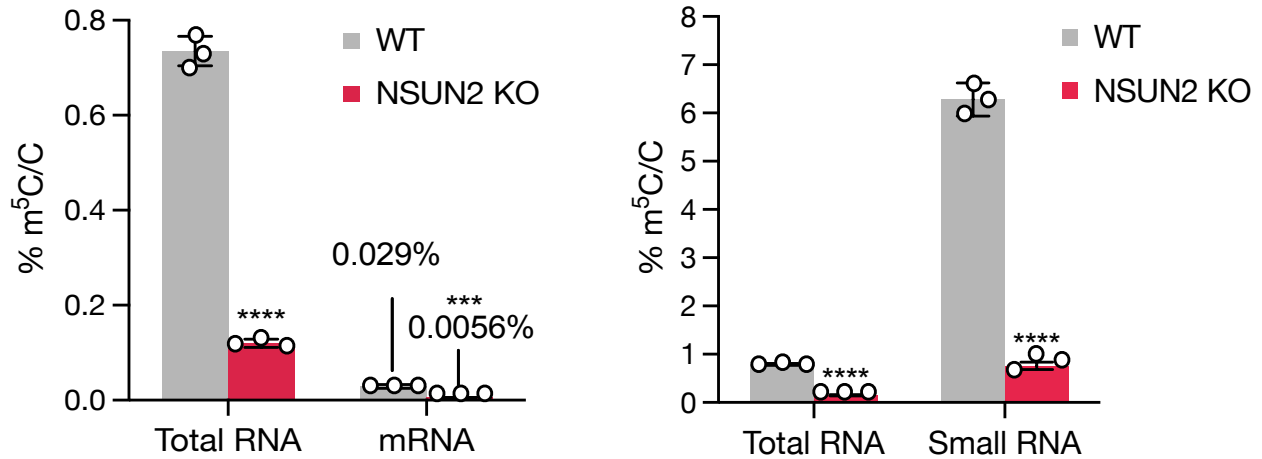

NSUN3 KO - Total and Small RNA

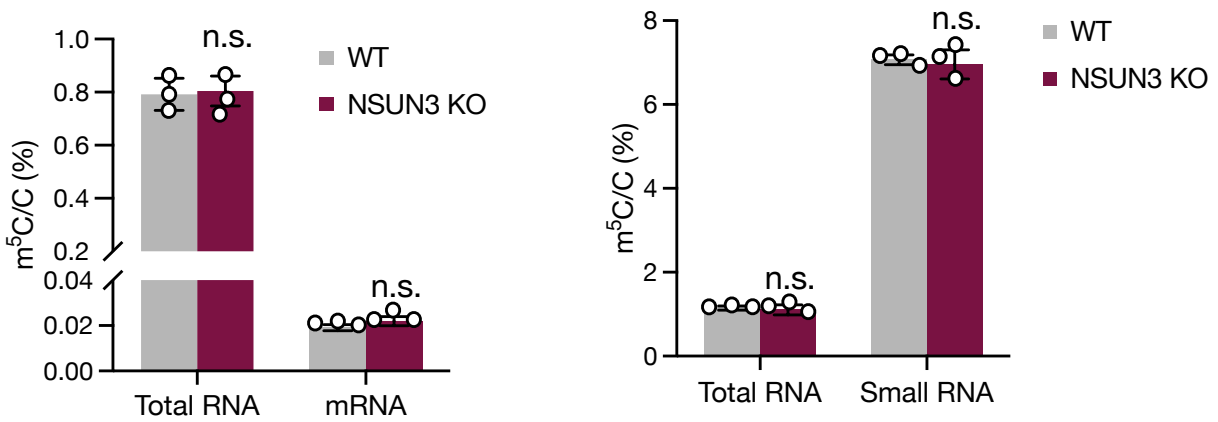

**Supplementary Figure 23.** Levels of m<sup>5</sup>C in total RNA, small RNA, and mRNA from WT 293T and NSUN2/NSUN3 KO cells analyzed by LC-QQQ-MS. Experiment was performed in triplicate. Three independent biological replicates were analyzed. Data represent mean values  $\pm$  s.d. An unpaired t-test (two-tailed) was performed to evaluate the statistical significance. *p* value, 0.0000049 (NSUN2 KO vs WT total RNA); 0.00054 (NSUN2 KO vs WT mRNA); 0.0000014 (NSUN2 KO vs total RNA); 0.0000107 (NSUN2 KO vs WT small RNA). Source data are provided as a Source Data file.



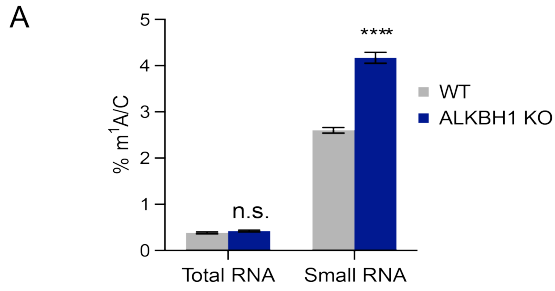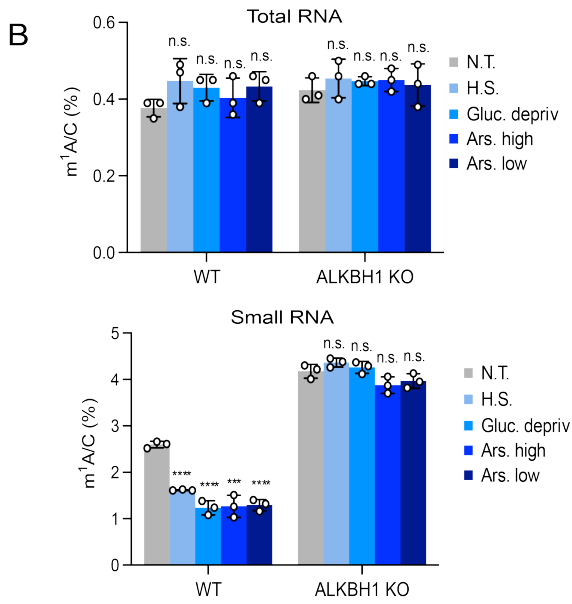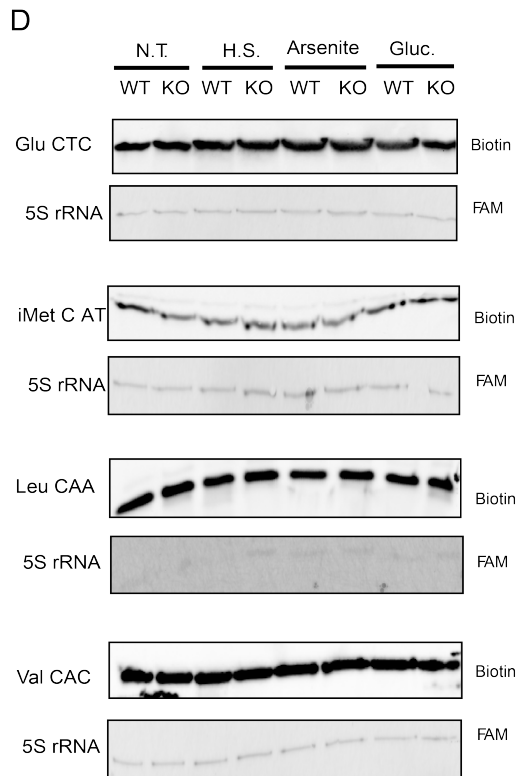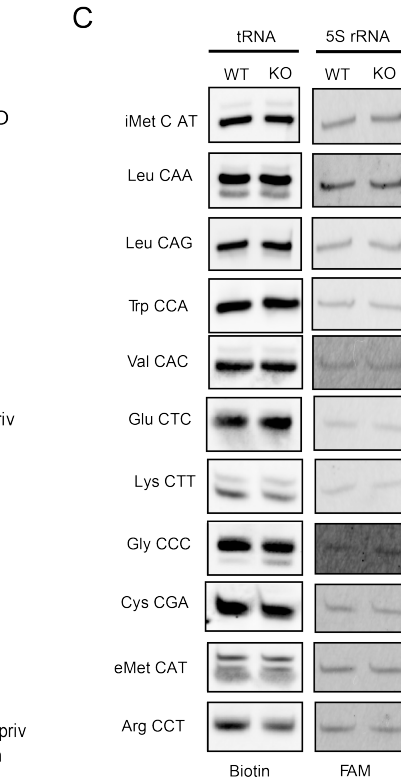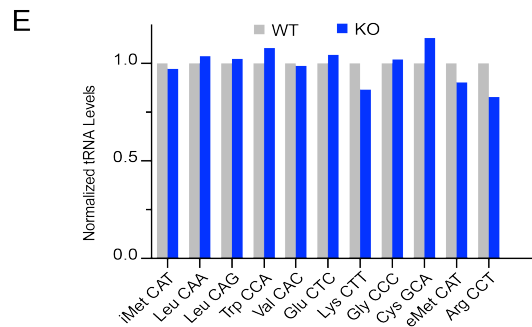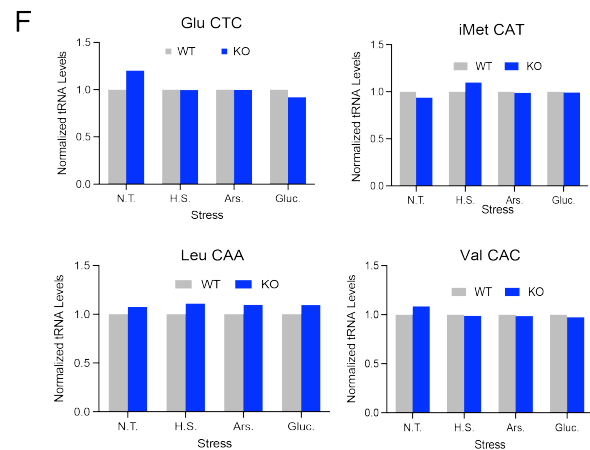

**Supplementary Figure 24.** The impact of cellular stress in ALKBH1-dependent levels of m<sup>1</sup>A. **(A)** Quantification of m<sup>1</sup>A levels in total and small RNA from WT and ALKBH1 KO cell lines. *p* value, 0.7048 (ALKBH1 KO vs WT total RNA); 0.000034 (ALKBH1 KO vs WT small RNA). **(B)** Quantification of m<sup>1</sup>A levels in total and small RNA from WT and ALKBH1 KO cell lines under cellular stress; N.T., no treatment; H.S., heat shock (42 °C for 1 hour); Gluc. depriv, glucose deprivation (5 mM glucose for 8 hours); Ars. high, oxidative stress (0.5 mM NaAsO<sub>2</sub> for 1 hour); Ars. low, oxidative stress (0.2 mM NaAsO<sub>2</sub> for 4 hour). *p* value, 0.000002 (H.S vs N.T.); 0.000001 (Gluc.depriv vs N.T.); 0.000012 (Ars.high vs N.T.) ; 0.000002 (Ars.low vs N.T). **(C)** Relative levels of various tRNAs in WT or ALKBH1 KO cells. Detection of 5S RNA was used as a loading control. **(D)** Relative levels of various tRNAs in WT or ALKBH1 KO cells under various cellular stresses. Detection of 5S RNA was used as a loading control. **(E)** Quantification of relative levels of various tRNAs from part C. Quantification was done by densitometry in the ImageJ software, and the intensity of each band was normalized to that of the corresponding 5S RNA band. KO values are plotted as a ratio of WT values. **(F)** Quantification of relative levels of various tRNAs from part D. Quantification was done by densitometry in the ImageJ software, and the intensity of each band was normalized to that of the corresponding 5S RNA band. KO values are plotted as a ratio of WT values. For A and B, three independent biological replicates were analyzed, and data represent mean values ± s.d. An unpaired t-test (two-tailed) was used to measure the statistical significance \**p* < 0.05, \*\* *p* < 0.01, \*\*\* *p* < 0.001, \*\*\*\* *p* < 0.0001. Source data are provided as a Source Data file.

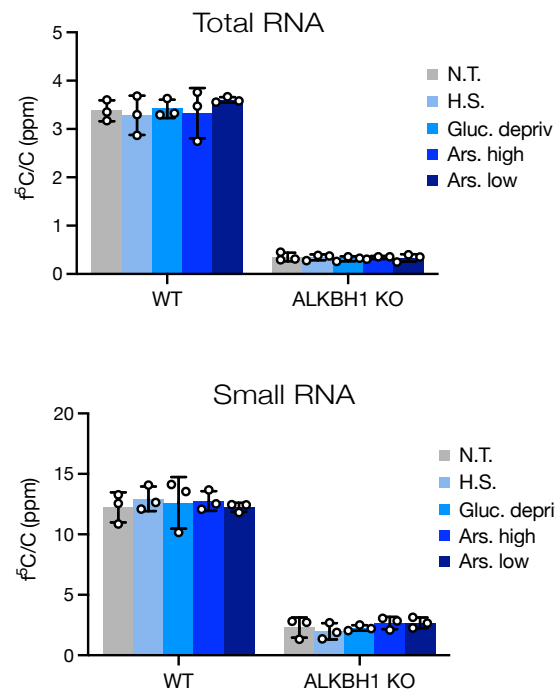

**Supplementary Figure 25.** Quantification of  $^{13}\text{C}$  levels in total and small RNA from WT and ALKBH1 KO cell lines under cellular stress; N.T., no treatment; H.S., heat shock (42 °C for 1 hour); Gluc. depriv, glucose deprivation (5 mM glucose for 8 hours); Ars. high, oxidative stress (0.5 mM NaAsO<sub>2</sub> for 1 hour); Ars. low, oxidative stress (0.2 mM NaAsO<sub>2</sub> for 4 hour). Three independent biological replicates were analyzed, and data represent mean values  $\pm$  s.d. An unpaired t-test (two-tailed) was used to measure the statistical significance. No changes were identified as statistically significant. Source data are provided as a Source Data file.

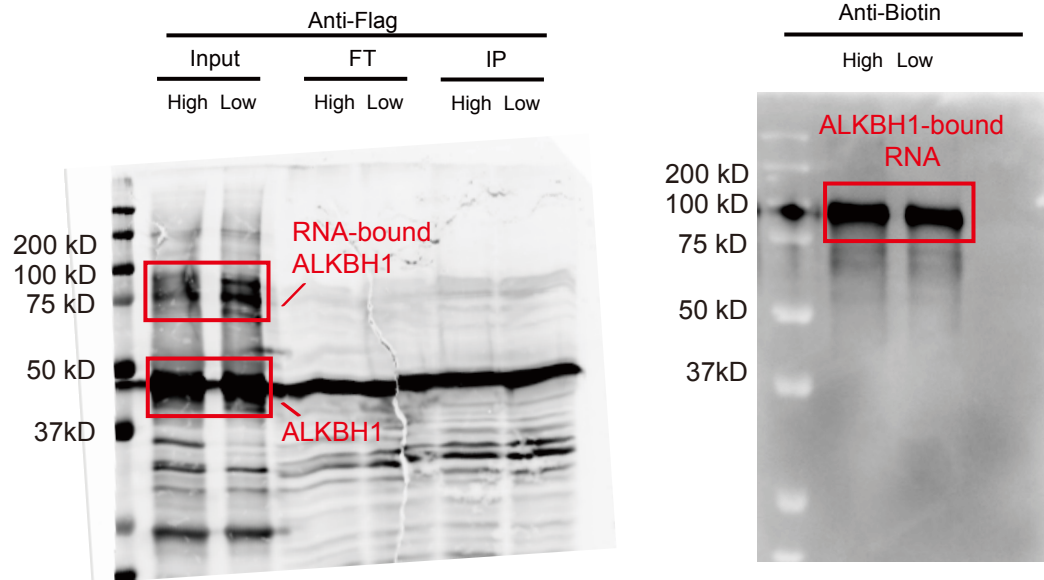

**Supplementary Figure 26.** 5-EC-iCLIP western blot analysis of 3xFLAG-ALKBH1 immunoprecipitation (IP). Expression of 3xFLAG-ALKBH1 was induced in stable cell lines. Cells were treated with 1mM 5-EC overnight, and RNA-protein crosslinks were partially digested with high and low amounts of RNase and further enriched by FLAG IP. RNA bound to the enriched protein was then biotinylated (full biotin blot from Fig. 4B in main text). Experiment was performed twice.

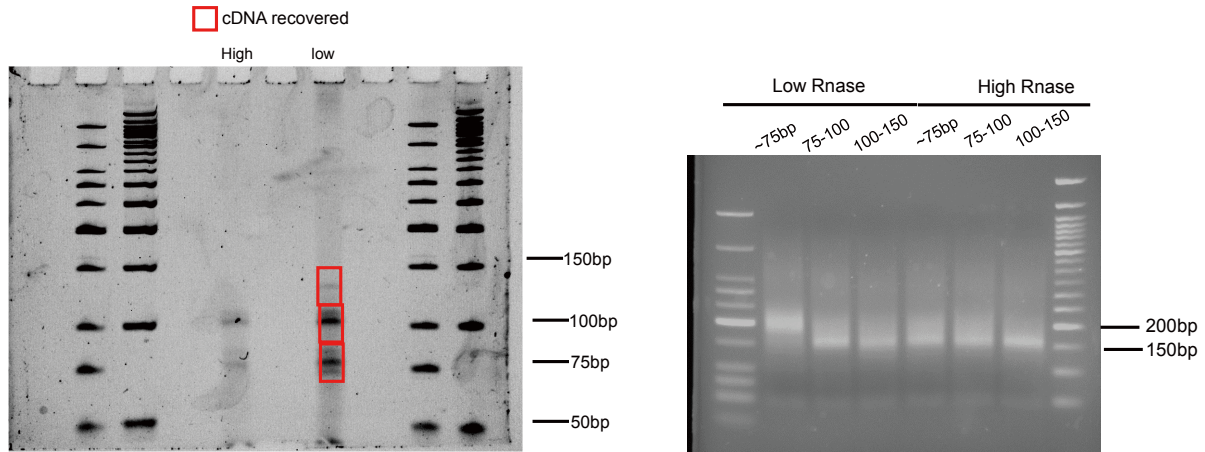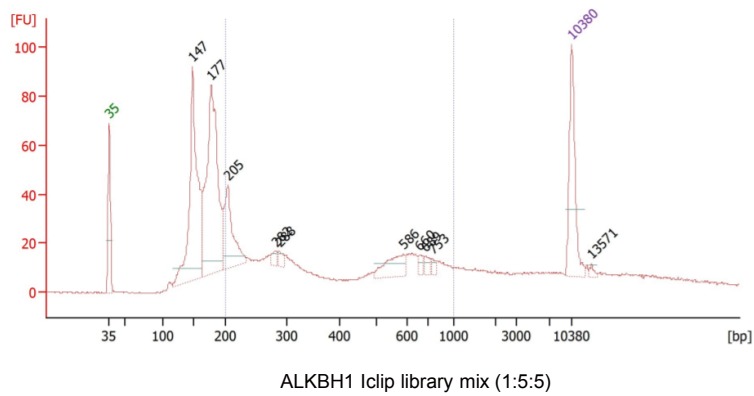

**Supplementary Figure 27.** 5-EC-iCLIP library preparation for next generation sequencing. Top left: TBE urea gel showing the recovered cDNA. Top right: Agarose gel showing the PCR product of iCLIP. Bottom: bioanalyzer analysis showing the mixed libraries for Illumina sequencing. The experiments were repeated two times independently with similar results.

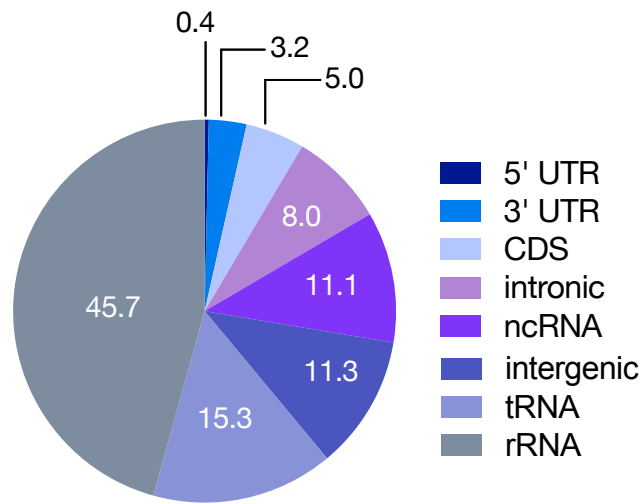

**Supplementary Figure 28.** RNA composition of untreated control sample (no 5-EC labeling) according to uniquely mapped reads.

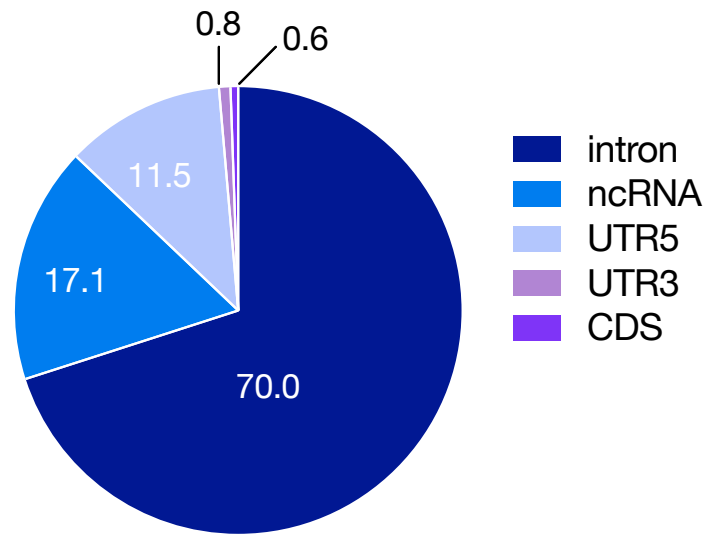

**Supplementary Figure 29.** Composition of non-tRNA/rRNA identified by 5-EC-iCLIP according to uniquely mapped reads.

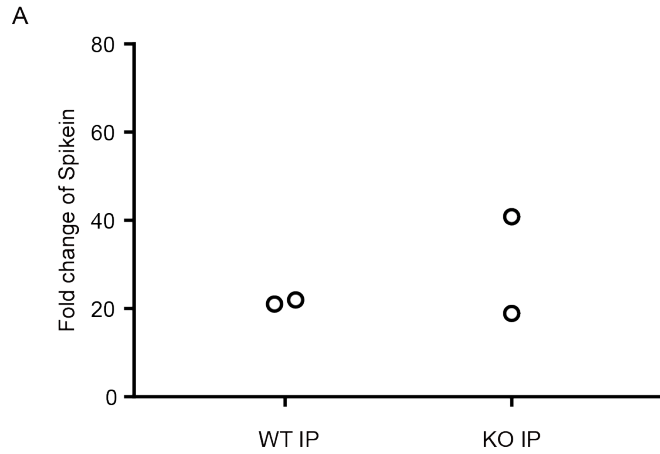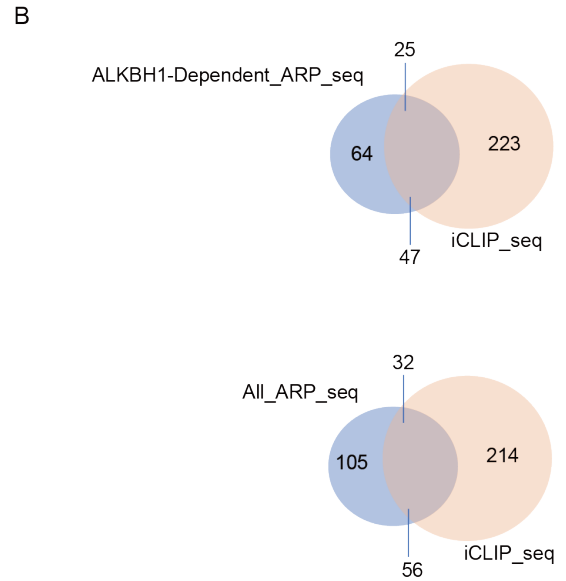

**Supplementary Figure 30.** ARP sequencing data. (A) Fold enrichment of  $f^{5}C$ -containing spike-in oligo during ARP sequencing in both WT and ALKBH1 KO 293T cells after IP. Two independent biological replicates were performed. Source data are provided as a Source Data file. (B) Venn diagram showing overlap between peaks detected by ARP sequencing and 5-EC-iCLIP. Source data are provided as a Source Data file.



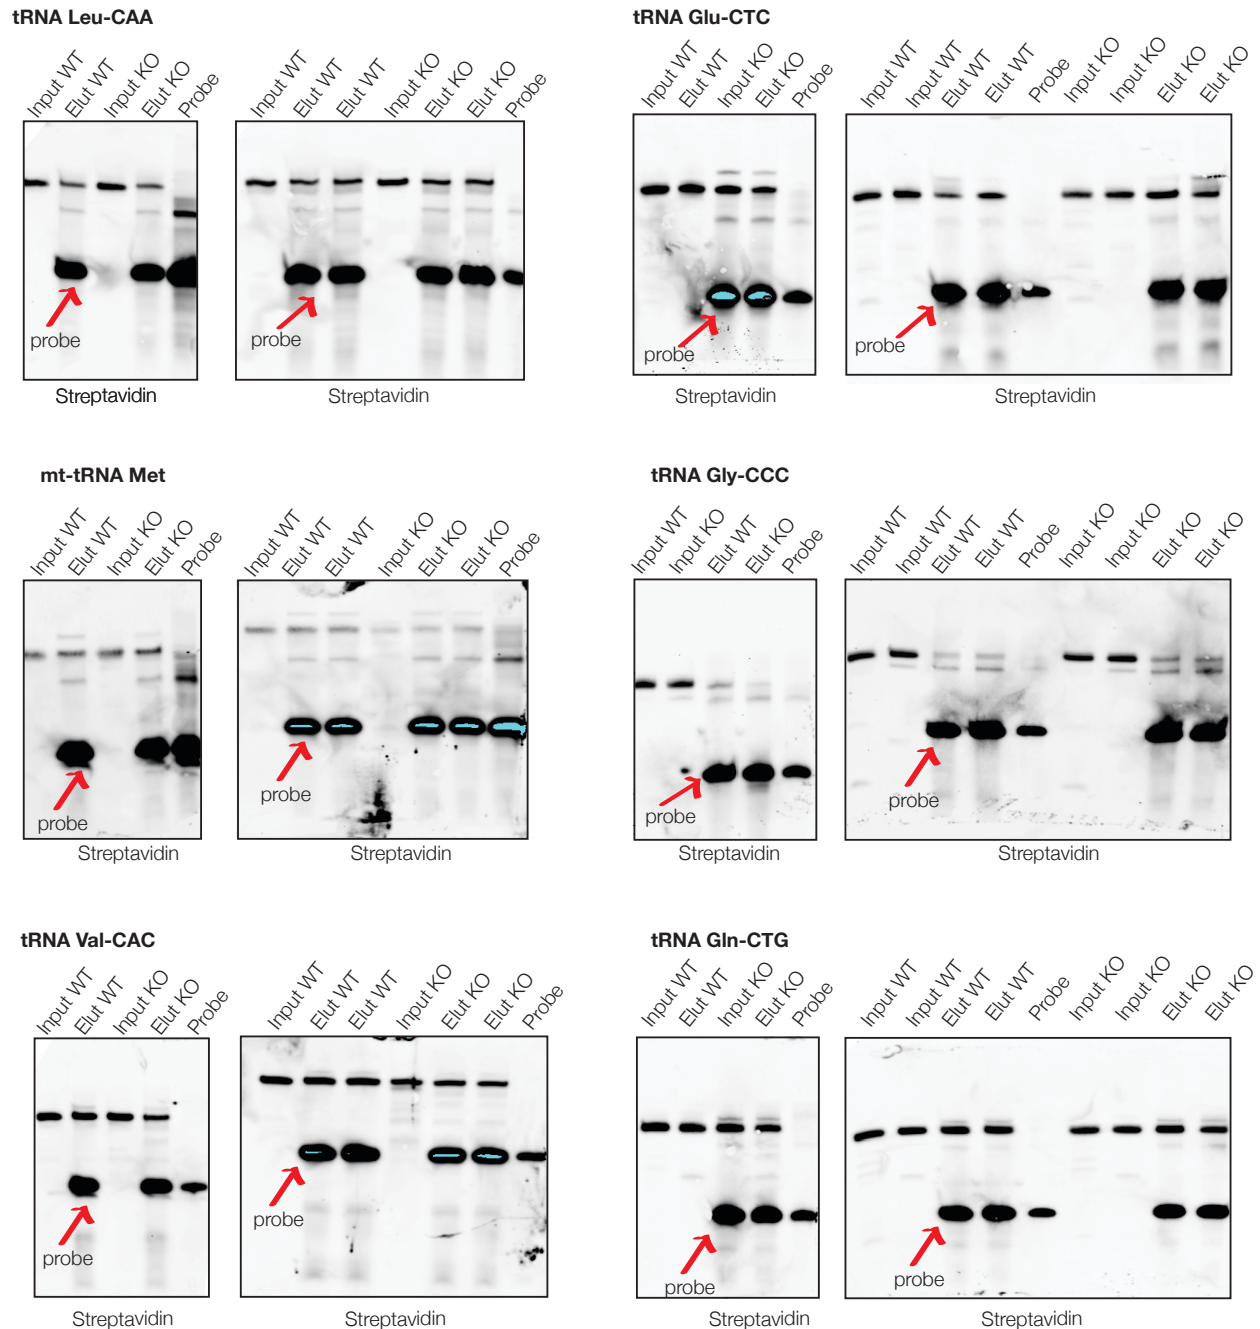

**Supplementary Figure 31.** Recovery of native tRNAs from WT and ALKBH1 KO cells. Individual tRNAs from bulk small RNA (input) were incubated with a complimentary biotinylated DNA probe, eluted, and analyzed by northern blot. For detection, the membrane-bound tRNA was annealed to the same biotinylated probe and further stained with a streptavidin-conjugated dye. The experiments were repeated three times independently with similar results.

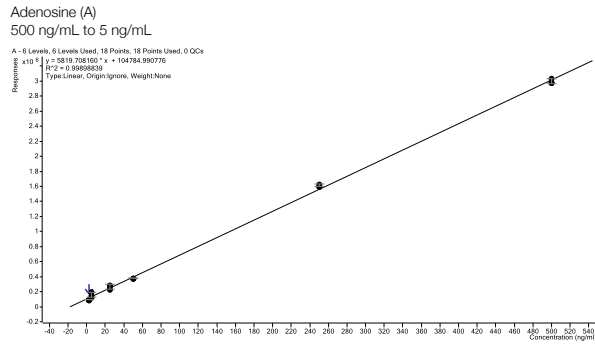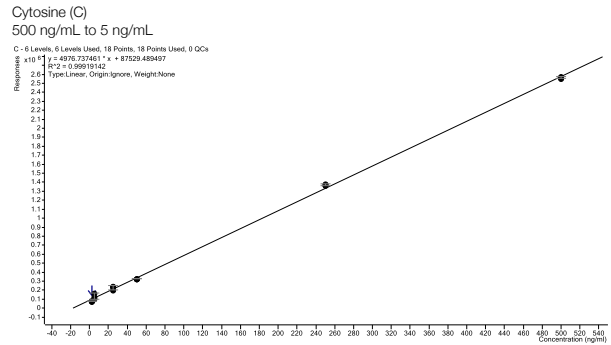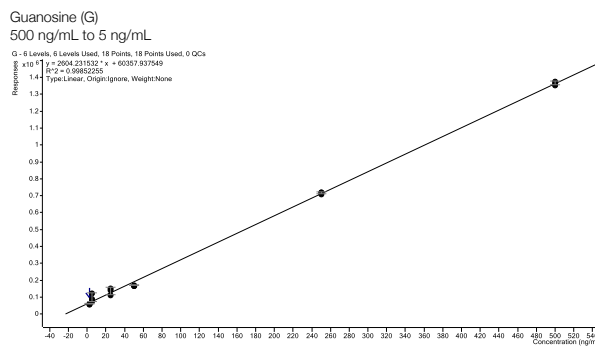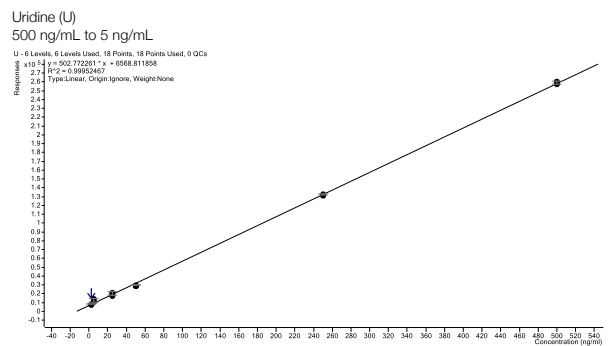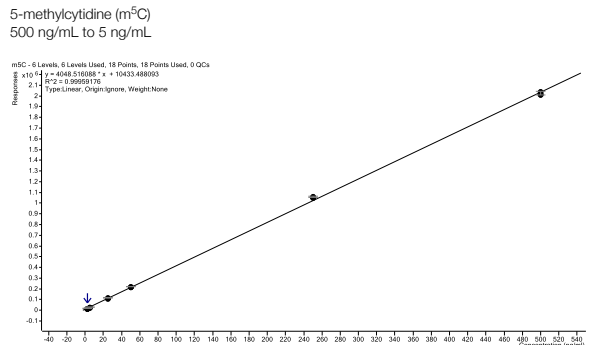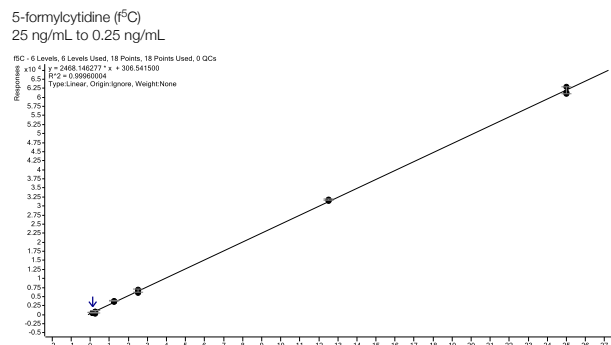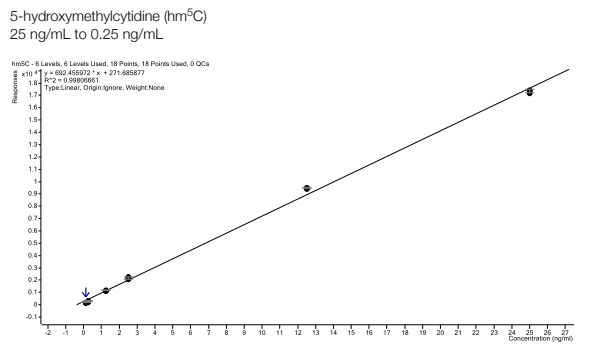

**Supplementary Figure 32.** Standard curves used for the LC-QQQ-MS quantification of hm<sup>5</sup>C and f<sup>5</sup>C in synthetic RNA substrates following *in vitro* oxidation with ALKBH1. Two technical replicates for each standard are used to generate standard curves.

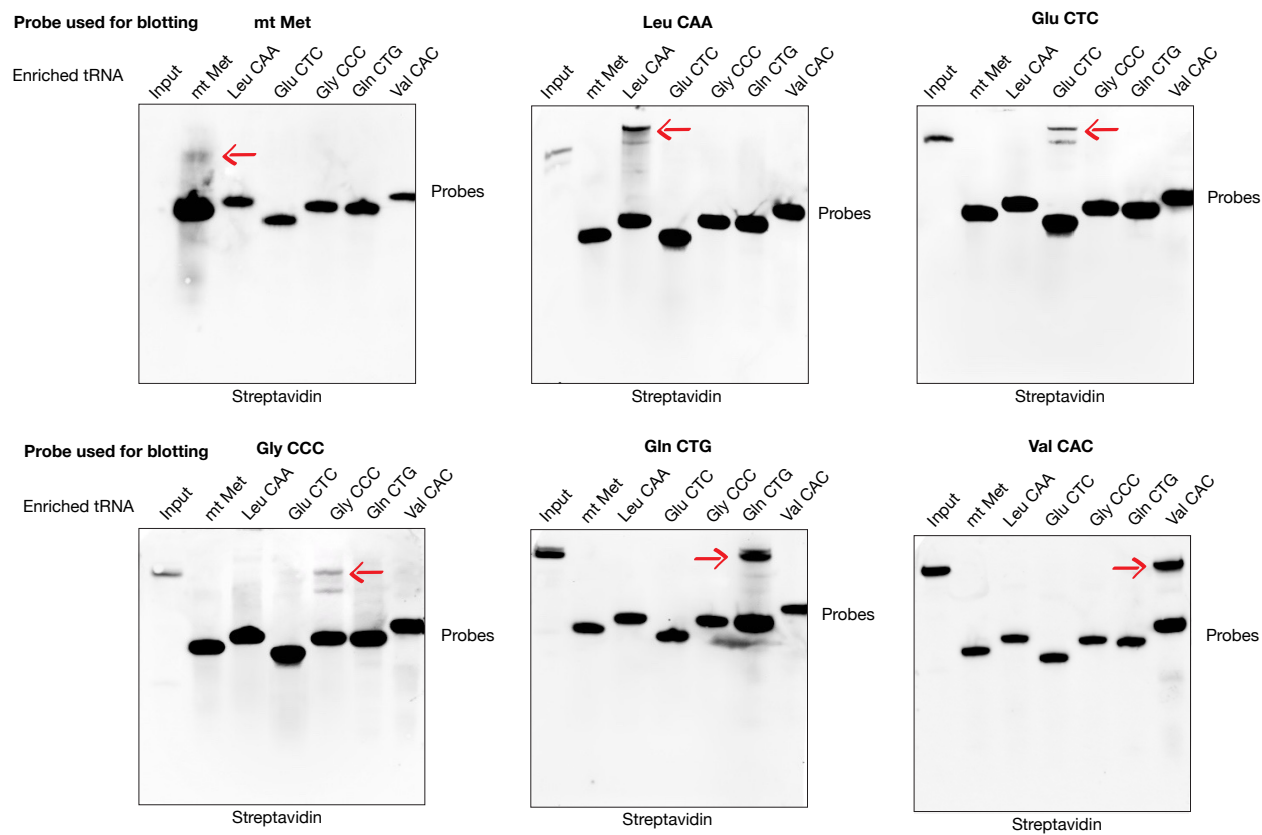

**Supplementary Figure 33:** tRNA antisense pulldowns with biotinylated probes are specific. Various tRNAs analyzed in this study were enriched by antisense pulldown and analyzed by northern blot using the complementary probe (the one used for pulldown) or a non-complementary probe to assess specificity. The experiments were repeated three times independently with similar results.

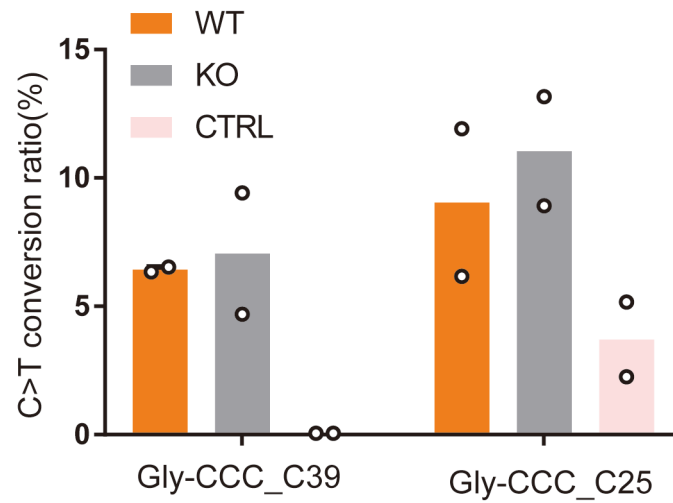

**Supplementary Fig 34.** ALKBH1-independent  $f^5C$  sites in tRNA-Gly-CCC and tRNA-Val-CAC by detected by pyridine borane sequencing. Two independent biological replicates were performed and analyzed. Source data are provided as a Source Data file.

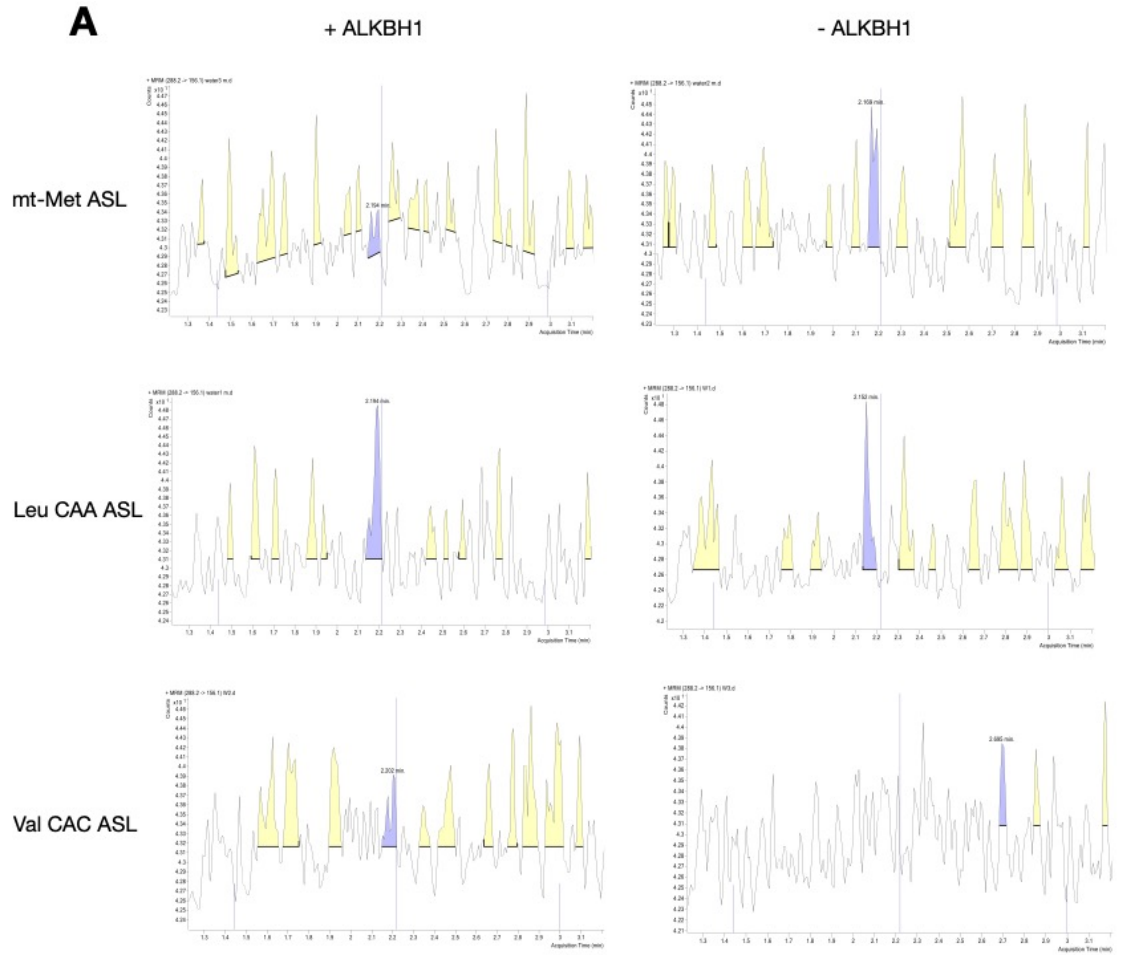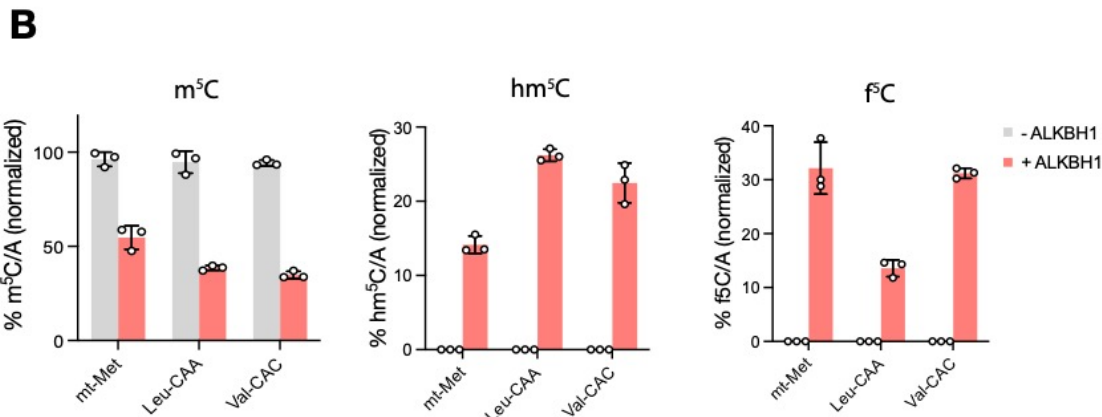

**Supplementary Figure 35:** ALKBH1 cannot catalyze the formation of  $ca^5C$  in vitro on model tRNA anticodon stem-loop substrates. **(A)** Raw  $ca^5C$  LC-MS/MS measurements in select tRNA anticodon stem-loop substrates after oxidative in vitro reaction with or without ALKBH1. Values are negligible. **(B)** Quantification of  $m^5C$ ,  $hm^5C$ , and  $f^5C$  for the same samples. Values are similar to those reported in the main text of this manuscript. Three independent biological replicates were analyzed. Data represent mean values  $\pm$  s.d. Source data are provided as a Source Data file.

Oligo 5:  
5' CAG CGA N7- m<sup>5</sup>C - N7 UCG UGC UGC UCG U

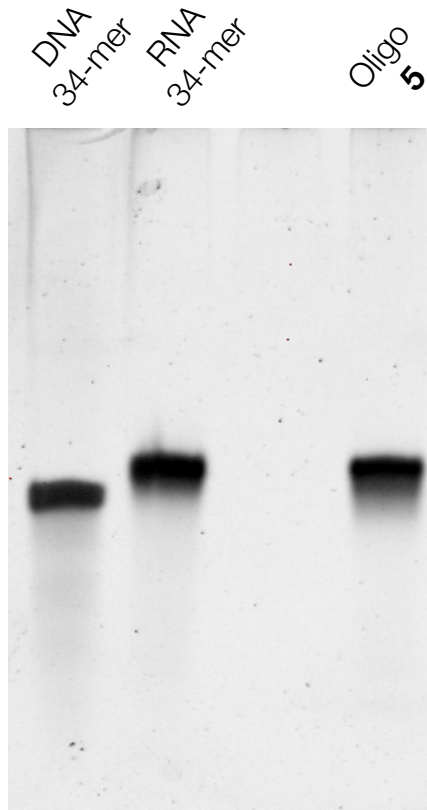

SYBR Green

**Supplementary Figure 36.** Characterization of oligo substrate **5**. Following solid-phase oligonucleotide synthesis and standard cleavage and deprotection, substrate **5** was purified and characterized by denaturing urea-PAGE. The experiments were repeated three times independently with similar results.

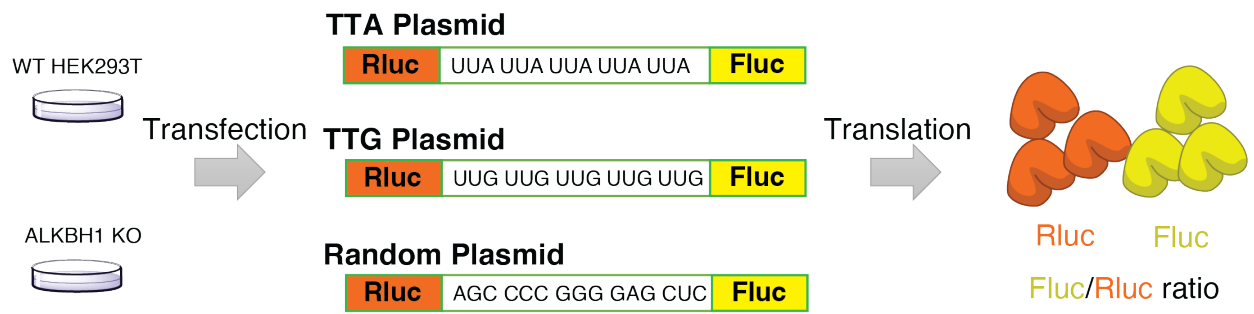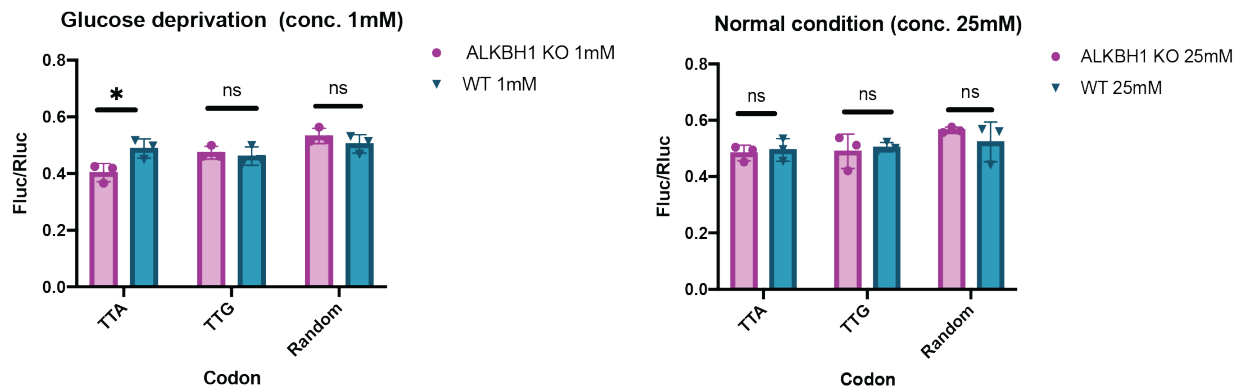

**Supplementary Figure 37.** Translation of TTG or TTA codons in WT 293T or ALKBH1 KO cells as quantified by dual luciferase assay. Fluc signal is normalized to Rluc signal for each condition. Three independent biological replicates were analyzed, and unpaired two-sided student T test was applied and \* as  $p = 0.034$ . Source data are provided as a Source data file.

## SUPPLEMENTARY TABLES

**Supplementary Table 1.** Dynamic multiple reaction monitoring (DMRM) parameters of for quantification nucleosides by LC-QQQ-MS.

| Nucleoside        | Fragmentor Energy (V) | Collision Energy (V) | Parent Ion [M+H] <sup>+</sup> | Product Ion | Source/Vendor      |
|-------------------|-----------------------|----------------------|-------------------------------|-------------|--------------------|
| A                 | 100                   | 20                   | 268.1                         | 136.1       | Sigma              |
| i <sup>6</sup> A  | 100                   | 20                   | 336.0                         | 204.0       | Cayman             |
| G                 | 80                    | 13                   | 284.1                         | 152.1       | Sigma              |
| C                 | 70                    | 14                   | 244.1                         | 112.1       | Sigma              |
| m <sup>5</sup> C  | 70                    | 14                   | 258.1                         | 126.1       | Carbosynth         |
| hm <sup>5</sup> C | 70                    | 14                   | 274.0                         | 142.0       | Carbosynth         |
| 5-EC              | 70                    | 14                   | 272.0                         | 140.0       | synthesized        |
| f <sup>5</sup> C  | 70                    | 14                   | 268.1                         | 136.1       | Berry & Associates |
| U                 | 70                    | 7                    | 245.1                         | 113.1       | Sigma              |
| 5-EU              | 70                    | 7                    | 273.0                         | 141.0       | Carbosynth         |
| ca <sup>5</sup> C | 80                    | 14                   | 288.2                         | 156         | Carbosynth         |



**Supplementary Table 2.** Nucleoside concentration (ng/mL) in total RNA of WT HEK 293T cells treated or untreated with 1 mM 5-EC as measured by LC-QQQ-MS. Experiments were performed in triplicate. Abundant nucleosides (ACGU) were quantified in 1 ng of RNA, while modified nucleosides (5-EC, m<sup>5</sup>C) were quantified in 100 ng of sample. Raw values correspond to data of Fig. 1D in main text.

| Treatment | Amount | C      | U      | m <sup>5</sup> C | A      | G       | 5-EC   | 5-EU  |
|-----------|--------|--------|--------|------------------|--------|---------|--------|-------|
| 5-EC      | 1 ng   | 461.12 | 155.88 | 497.04           | 243.14 | 639.51  | 624.42 | 4.030 |
| 5-EC      | 1 ng   | 478.79 | 358.90 | 484.69           | 222.22 | 1377.11 | 602.67 | 3.974 |
| 5-EC      | 1 ng   | 423.92 | 292.21 | 420.55           | 420.60 | 1188.87 | 632.96 | 4.397 |
| Control   | 1 ng   | 284.51 | 124.57 | 224.50           | 175.79 | 344.76  | 0      | 0     |
| Control   | 1 ng   | 285.50 | 123.63 | 239.42           | 170.34 | 337.26  | 0      | 0     |
| Control   | 1 ng   | 291.68 | 126.26 | 248.37           | 168.48 | 335.61  | 0      | 0     |

**Supplementary Table 3:**  $f^5C$  nucleoside concentration (ng/mL) in total RNA of WT 293T cells after cells after overnight treatment with 1mM 5-EC or vehicle as measured by LC-MS/MS. Experiments were performed in triplicate. Nucleosides marked with  $^{\dagger}$  were quantified in 200 ng of RNA. All others were quantified in 1 ng of RNA. Raw values correspond to the data of Supplementary Fig. 4.

| Treatment | C     | m5C  | U    | 5-EC $^{\dagger}$ | A    | f5C $^{\dagger}$ | G     |
|-----------|-------|------|------|-------------------|------|------------------|-------|
| DMSO      | 164.8 | 1.57 | 72.9 | 0                 | 86.9 | 0.330            | 246.5 |
| DMSO      | 156.2 | 1.59 | 73.4 | 0                 | 77.9 | 0.346            | 222.7 |
| DMSO      | 160.9 | 1.60 | 77.5 | 0                 | 82.2 | 0.350            | 226.4 |
| 5-EC      | 141.2 | 1.51 | 71.6 | 200.4             | 73.2 | 0.301            | 196.7 |
| 5-EC      | 144.9 | 1.49 | 66.4 | 194.4             | 71.4 | 0.327            | 192.2 |
| 5-EC      | 138.9 | 1.48 | 63.3 | 189.7             | 66.9 | 0.304            | 182.5 |

**Supplementary Table 4.** Sequences and characterization of anticodon stem-loop (ASL) substrates and linear RNA oligo substrates 1-8.

| Substrate    | Sequence                                                           | z   | Exp. mass     | Obs. mass (ESI-TOF HRMS) |
|--------------|--------------------------------------------------------------------|-----|---------------|--------------------------|
| Mt-Met ALS   | 5' UAU CGG GCC m <sup>5</sup> CAU ACC CCG AA                       | 3   | 2110.97281    | 2110.97582               |
| iMet-CAT ASL | 5' UCG UGG GCC m <sup>5</sup> CAU AAC CCA GA                       | 3   | 2124.30819    | 2124.3133                |
| Val-CAC ASL  | 5' CGU UCG CCU m <sup>5</sup> CAC ACG CGA AA                       | 3   | 2110.97281    | 2110.96902               |
| Leu-CAA ASL  | 5' CGC CAG ACU m <sup>5</sup> CAA GUU CUG GU                       | 3   | 2216.96045    | 2116.94294               |
| Gln-CTG ASL  | 5' CUC UGG ACU m <sup>5</sup> CUG AAU CCA GC                       | 4   | 1577.46875    | 1577.46582               |
| Glu-CTC ASL  | 5' UUC GGC GCU m <sup>5</sup> CUC ACC GCC GC                       | 4   | 1569.21602    | 1559.20509               |
| Gly-CCC ASL  | 5' UUC UCG CCU m <sup>5</sup> CCC ACG CGG GA                       | 4   | 1575.21875    | 1575.21534               |
| Leu-CAG ASL  | 5' CGC UGC GUU m <sup>5</sup> CAG GUC GCA GU                       | 4   | 1595.46775    | 1594.46023               |
| 1            | 5' Bio-UAU CGG GCC (5-EC)AU ACC CCG AA                             | 4   | 1686.76288    | 1686.75218               |
| 2            | 5' Bio-UAU CGG GCC (m <sup>5</sup> C)AU ACC CCG AA                 | 4   | 1684.26678    | 1684.2564                |
| 3            | 5' UAU AGA GCC m <sup>5</sup> CAU ACC CCG AA                       | 3   | 2113.64491    | 2113.64849               |
| 4            | 5' UAU UGU GCC m <sup>5</sup> CAU ACC CCG AA                       | 3   | 2098.29343    | 2098.29488               |
| 5            | 5' CAG CGA NNN NNN Nm <sup>5</sup> CN NNN<br>NNN UCG UGC UGC UCG U | n/a | N/A (library) | N/A (library)            |
| 6            | 5' UUU GAA m <sup>5</sup> CCC GG                                   | 3   | 1158.50233    | 1158.50818               |
| 7            | 5' UUU GAA Cm <sup>5</sup> CC GG                                   | 3   | 1158.50233    | 1158.49967               |
| 8            | 5' UUU GAA CCm <sup>5</sup> C GG                                   | 3   | 1158.50233    | 1158.49185               |

**Supplementary Table 5.** Sequences of guide RNAs for CRISPR-Cas9 KO cell generation.

| KO           | Sequence              |
|--------------|-----------------------|
| ALKBH1 KO1/2 | TTCGGAAACTTTTCCGCTTC  |
| TET2 KO1     | TGGAGAAAGACGTA ACTTCG |
| TET2 KO2     | ATCGCATACCTCAGGGCAGA  |
| NSUN2        | GCTGCGGATTGCAACACGCG  |
| NSUN3        | TGTTCAAATGATCGAAGCTG  |

**Supplementary Table 6.** Nucleoside concentration (ng/mL) in total RNA and mRNA of WT HEK 293T and ALKBH1 KO cells measured by LC-QQQ-MS. Experiments were performed in triplicate. Nucleosides marked with † were quantified in 200 ng of RNA. All others were quantified in 1 ng of RNA. Raw values correspond to data of Figs. 3B-C in main text.

| Cell Line | RNA type | hm <sup>5</sup> C <sup>†</sup> | C     | U     | m <sup>5</sup> C | A     | f <sup>5</sup> C <sup>†</sup> | G     | i <sup>6</sup> A    |
|-----------|----------|--------------------------------|-------|-------|------------------|-------|-------------------------------|-------|---------------------|
| KO 1      | Total    | 0.0133                         | 175.7 | 85.0  | 1.5134           | 134.9 | 0.0202                        | 272.4 | 0.0732              |
| KO 1      | Total    | 0.0136                         | 172.6 | 77.4  | 1.3912           | 120.4 | 0.0162                        | 221.0 | 0.0406              |
| KO 1      | Total    | 0.0212                         | 199.6 | 92.8  | 1.7586           | 182.6 | 0.0212                        | 330.9 | 0.0092              |
| KO 1      | mRNA     | 0                              | 161.4 | 144.4 | 0.0461           | 207.1 | 0.0104                        | 238.7 | 0.4133 <sup>†</sup> |
| KO 1      | mRNA     | 0                              | 148.4 | 128.6 | 0.0409           | 191.5 | 0.0108                        | 216.7 | 0.3882 <sup>†</sup> |
| KO 1      | mRNA     | 0                              | 167.4 | 147.7 | 0.0393           | 259.4 | 0.0138                        | 262.9 | 0.5325 <sup>†</sup> |
| KO 2      | Total    | 0.0184                         | 208.3 | 105.9 | 1.7324           | 168.6 | 0.0408                        | 314.5 | 0.0759              |
| KO 2      | Total    | 0.0171                         | 184.7 | 89.6  | 1.5825           | 144.6 | 0.0289                        | 290.2 | 0.0554              |
| KO 2      | Total    | 0.0242                         | 212.6 | 98.2  | 1.7686           | 195.4 | 0.0495                        | 353.1 | 0.0144              |
| KO 2      | mRNA     | 0                              | 157.8 | 139.5 | 0.0304           | 193.7 | 0.0116                        | 231.1 | 0.4362 <sup>†</sup> |
| KO 2      | mRNA     | 0                              | 147.8 | 126.8 | 0.0401           | 187.4 | 0.0108                        | 210.5 | 0.4062 <sup>†</sup> |
| KO 2      | mRNA     | 0                              | 150.1 | 134.5 | 0.0324           | 232.5 | 0.0177                        | 238.0 | 0.5766 <sup>†</sup> |
| WT        | Total    | 0.1463                         | 240.3 | 119.9 | 1.9143           | 188.7 | 0.4143                        | 363.0 | 0.0921              |
| WT        | Total    | 0.1262                         | 209.0 | 94.3  | 1.9961           | 161.4 | 0.351                         | 322.4 | 0.0615              |
| WT        | Total    | 0.151                          | 224.5 | 105.1 | 1.9910           | 205.7 | 0.346                         | 371.5 | 0.0282              |
| WT        | mRNA     | 0                              | 144.1 | 123.6 | 0.0374           | 174.2 | 0.0505                        | 211.7 | 0.2661 <sup>†</sup> |
| WT        | mRNA     | 0                              | 145.5 | 122.2 | 0.0355           | 184.2 | 0.049                         | 215.4 | 0.2554 <sup>†</sup> |
| WT        | mRNA     | 0                              | 147.8 | 130.1 | 0.0323           | 214.8 | 0.0521                        | 236.0 | 0.2185 <sup>†</sup> |

**Supplementary Table 7.** Nucleoside concentration (ng/mL) in total and small RNA of WT HEK 293T and ALKBH1 KO cells measured by LC-QQQ-MS. Experiments were performed in triplicate. Nucleosides marked with † were quantified in 200 ng of RNA. All others were quantified in 1 ng of RNA. Raw values correspond to data of Figs. 3B-D in main text.

| Cell Line | RNA type | hm <sup>5</sup> C <sup>†</sup> | C      | U      | m <sup>5</sup> C | A      | f <sup>5</sup> C <sup>†</sup> | G      | i <sup>6</sup> A <sup>†</sup> |
|-----------|----------|--------------------------------|--------|--------|------------------|--------|-------------------------------|--------|-------------------------------|
| KO 1      | Total    | 0.041                          | 360.32 | 185.97 | 2.512            | 317.90 | 0.0388                        | 567.02 | 17.584                        |
| KO 1      | Total    | 0.0298                         | 360.53 | 186.40 | 2.918            | 320.32 | 0.0346                        | 569.92 | 17.662                        |
| KO 1      | Total    | 0.0414                         | 363.72 | 188.45 | 2.741            | 322.92 | 0.0300                        | 574.01 | 17.356                        |
| KO 1      | small    | 0.3026                         | 236.67 | 206.94 | 19.741           | 345.93 | 0.0809                        | 552.35 | 144.518                       |
| KO 1      | small    | 0.3026                         | 329.44 | 205.11 | 15.748           | 346.30 | 0.0815                        | 555.84 | 155.959                       |
| KO 1      | small    | 0.3746                         | 323.96 | 208.55 | 18.201           | 346.44 | 0.0974                        | 554.89 | 154.429                       |
| WT        | Total    | 0.2052                         | 411.68 | 214.78 | 3.336            | 357.05 | 0.4510                        | 639.57 | 14.235                        |
| WT        | Total    | 0.272                          | 409.78 | 212.66 | 3.252            | 355.78 | 0.3839                        | 645.67 | 13.862                        |
| WT        | Total    | 0.1349                         | 407.50 | 210.32 | 2.937            | 356.26 | 0.4932                        | 643.97 | 14.265                        |
| WT        | small    | 3.0133                         | 314.98 | 191.44 | 17.782           | 324.69 | 1.3855                        | 527.66 | 144.514                       |
| WT        | small    | 3.2078                         | 330.60 | 196.94 | 17.297           | 177.58 | 1.3854                        | 356.54 | 98.065                        |
| WT        | small    | 2.9223                         | 327.72 | 194.30 | 19.971           | 159.61 | 1.4053                        | 364.29 | 86.706                        |

**Supplementary Table 8.** Nucleoside concentration (ng/mL) in total RNA and mRNA of WT HEK 293T and TET2 KO cells measured by LC-QQQ-MS. Experiments were performed in triplicate. Nucleosides marked with † were quantified in 200 ng of RNA. All others were quantified in 1 ng of RNA. Raw values correspond to data of Fig. 3E in the main text.

| Cell Line | RNA type | hm <sup>5</sup> C <sup>†</sup> | C     | U     | m <sup>5</sup> C <sup>†</sup> | A     | f <sup>5</sup> C <sup>†</sup> | G     | i <sup>6</sup> A <sup>†</sup> |
|-----------|----------|--------------------------------|-------|-------|-------------------------------|-------|-------------------------------|-------|-------------------------------|
| KO 1      | Total    | 0.0375                         | 178.1 | 85.3  | 271.3                         | 132.4 | 0.423                         | 255.5 | 14.111                        |
| KO 1      | Total    | 0.0325                         | 164.3 | 79.4  | 266.5                         | 133.7 | 0.408                         | 273.8 | 14.078                        |
| KO 1      | Total    | 0.0356                         | 164.7 | 80.2  | 266.7                         | 130.9 | 0.390                         | 263.9 | 14.049                        |
| KO 1      | mRNA     | 0                              | 157.4 | 126.4 | 4.87                          | 182.8 | 0.077                         | 226.6 | 0.856                         |
| KO 1      | mRNA     | 0                              | 157.0 | 125.2 | 4.78                          | 180.6 | 0.074                         | 222.9 | 0.833                         |
| KO 1      | mRNA     | 0                              | 151.1 | 126.0 | 4.73                          | 181.4 | 0.084                         | 226.5 | 0.842                         |
| KO 2      | Total    | 0.0254                         | 178.6 | 86.7  | 293.6                         | 147.4 | 0.289                         | 286.8 | 12.410                        |
| KO 2      | Total    | 0.0326                         | 179.6 | 87.0  | 285.2                         | 145.3 | 0.301                         | 281.7 | 12.336                        |
| KO 2      | Total    | 0.0401                         | 179.4 | 88.5  | 286.8                         | 146.7 | 0.289                         | 281.1 | 12.268                        |
| KO 2      | mRNA     | 0                              | 142.1 | 120.8 | 3.27                          | 173.1 | 0.040                         | 203.0 | 0.631                         |
| KO 2      | mRNA     | 0                              | 143.7 | 120.4 | 3.21                          | 172.8 | 0.040                         | 200.7 | 0.629                         |
| KO 2      | mRNA     | 0                              | 132.4 | 116.5 | 3.20                          | 172.0 | 0.042                         | 205.1 | 0.606                         |
| WT        | Total    | 0.1463                         | 183.6 | 83.1  | 293.4                         | 136.1 | 0.347                         | 266.5 | 12.715                        |
| WT        | Total    | 0.1203                         | 181.5 | 83.7  | 295.5                         | 138.0 | 0.375                         | 269.6 | 13.358                        |
| WT        | Total    | 0.1238                         | 184.1 | 83.4  | 291.1                         | 136.6 | 0.361                         | 264.9 | 13.513                        |
| WT        | mRNA     | 0                              | 138.8 | 111.0 | 3.79                          | 159.9 | 0.057                         | 192.3 | 0.567                         |
| WT        | mRNA     | 0                              | 123.8 | 107.3 | 3.72                          | 159.8 | 0.055                         | 195.0 | 0.540                         |
| WT        | mRNA     | 0                              | 128.6 | 109.0 | 3.83                          | 162.5 | 0.056                         | 197.0 | 0.560                         |

**Supplementary Table 9.** Nucleoside concentration (ng/mL) in total RNA and small of WT HEK 293T and TET2 KO cells measured by LC-QQQ-MS. Experiments were performed in triplicate. Nucleosides marked with † were quantified in 200 ng of RNA. All others were quantified in 1 ng of RNA.

| Cell Line | RNA Type | hm5C <sup>†</sup> | C     | m5C  | U    | A     | f5C <sup>†</sup> | G     | i6A <sup>†</sup> |
|-----------|----------|-------------------|-------|------|------|-------|------------------|-------|------------------|
| KO1       | Total    | 0.061             | 124.8 | 1.25 | 74.4 | 186.3 | 0.277            | 211.0 | 15.4             |
| KO1       | Total    | 0.061             | 127.3 | 1.21 | 75.9 | 185.4 | 0.268            | 209.5 | 15.4             |
| KO1       | Total    | 0.062             | 115.9 | 1.03 | 68.8 | 181.4 | 0.260            | 187.5 | 15.6             |
| KO2       | Total    | 0.073             | 149.4 | 1.48 | 86.2 | 171.2 | 0.318            | 229.3 | 18.1             |
| KO2       | Total    | 0.079             | 145.4 | 1.35 | 86.0 | 173.9 | 0.315            | 221.3 | 16.6             |
| KO2       | Total    | 0.061             | 119.6 | 1.19 | 68.6 | 172.3 | 0.304            | 190.4 | 14.6             |
| WT        | Total    | 0.114             | 129.1 | 1.31 | 78.7 | 180.5 | 0.306            | 172.6 | 15.5             |
| WT        | Total    | 0.138             | 150.4 | 1.22 | 89.5 | 192.0 | 0.325            | 209.6 | 20.5             |
| WT        | Total    | 0.126             | 133.5 | 1.36 | 78.7 | 182.7 | 0.301            | 180.5 | 18.6             |
| KO1       | Small    | 1.34              | 120.5 | 6.91 | 79.0 | 146.9 | 0.989            | 184.1 | 127.4            |
| KO1       | Small    | 1.66              | 125.0 | 7.59 | 75.7 | 146.5 | 0.988            | 183.7 | 141.2            |
| KO1       | Small    | 1.57              | 142.2 | 7.78 | 85.2 | 137.9 | 1.20             | 193.7 | 117.0            |
| KO2       | Small    | 1.47              | 120.8 | 8.11 | 71.2 | 142.2 | 1.09             | 171.5 | 168.4            |
| KO2       | Small    | 1.51              | 123.0 | 8.30 | 74.2 | 129.1 | 0.98             | 183.0 | 149.0            |
| KO2       | Small    | 1.53              | 120.5 | 8.17 | 72.6 | 139.7 | 1.05             | 190.6 | 165.3            |
| WT        | Small    | 2.29              | 120.5 | 8.19 | 73.9 | 136.1 | 1.08             | 209.3 | 157.7            |
| WT        | Small    | 2.55              | 139.7 | 9.21 | 87.0 | 173.0 | 1.19             | 220.5 | 183.9            |
| WT        | Small    | 2.56              | 138.5 | 9.33 | 86.8 | 198.8 | 1.06             | 203.9 | 170.7            |



**Supplementary Table 10.** ca<sup>5</sup>C nucleoside concentration (ng/mL) in total RNA and small of WT HEK 293T and ALKBH1 measured by LC-QQQ-MS. Experiments were performed in triplicate. Nucleosides marked with † were quantified in 200 ng of RNA. All others were quantified in 1 ng of RNA. Raw values correspond to the data of Supplementary Fig. 22

| Cell Line | RNA Type | hm5C <sup>†</sup> | C     | ca5C <sup>†</sup> | m5C   | U     | A     | f5C <sup>†</sup> | G     | i6A <sup>†</sup> |
|-----------|----------|-------------------|-------|-------------------|-------|-------|-------|------------------|-------|------------------|
| KO        | Total    | 0.0321            | 170.7 | 0                 | 1.47  | 81.7  | 115.9 | 0.0303           | 199.7 | 15.1             |
| KO        | Total    | 0.0318            | 216.7 | 0                 | 1.56  | 101.7 | 104.2 | 0.0289           | 239.7 | 14.4             |
| KO        | Total    | 0.0321            | 212.3 | 0                 | 1.69  | 102.7 | 102.2 | 0.03184          | 232.3 | 14.5             |
| KO        | Small    | 0.2964            | 219.7 | 0                 | 10.67 | 115.1 | 112.3 | 0.1265           | 236.7 | 193.8            |
| KO        | Small    | 0.1725            | 164.5 | 0                 | 7.86  | 85.4  | 76.0  | 0.109            | 167.1 | 138.4            |
| KO        | Small    | 0.2082            | 190.3 | 0                 | 9.32  | 97.9  | 97.2  | 0.1011           | 202.3 | 177.8            |
| WT        | Total    | 0.264             | 255.7 | 0                 | 2.01  | 120.3 | 100.4 | 0.502            | 249.1 | 12.0             |
| WT        | Total    | 0.2207            | 233.3 | 0                 | 1.90  | 108.5 | 93.9  | 0.5306           | 231.9 | 11.9             |
| WT        | Total    | 0.2742            | 245.4 | 0                 | 2.03  | 116.3 | 98.2  | 0.5224           | 247.5 | 12.8             |
| WT        | Small    | 1.171             | 200.7 | 0                 | 9.41  | 107.1 | 105.1 | 1.5192           | 181.2 | 173.7            |
| WT        | Small    | 1.028             | 202.2 | 0                 | 9.56  | 106.8 | 102.7 | 1.6159           | 193.1 | 188.2            |
| WT        | Small    | 1.1461            | 199.7 | 0                 | 9.20  | 105.0 | 92.4  | 1.4049           | 198.4 | 143.2            |

**Supplementary Table 11.** Nucleoside concentration (ng/mL) in total RNA and mRNA of WT HEK 293T and NSUN2 KO cells measured by LC-QQQ-MS. Experiments were performed in triplicate. Nucleosides marked with † were quantified in 200 ng of RNA. All others were quantified in 1 ng of RNA. Raw values correspond to data of Fig. 3F in the main text.

| Cell Line | RNA Type | 5hmC <sup>†</sup> | C     | U     | m5C <sup>†</sup> | A     | f5C <sup>†</sup> | G     | i6A <sup>†</sup> |
|-----------|----------|-------------------|-------|-------|------------------|-------|------------------|-------|------------------|
| KO        | Total    | 0.0252            | 42.59 | 12.17 | 7.27             | 30.27 | 0.073            | 46.61 | 2.49             |
| KO        | Total    | 0.0127            | 36.83 | 14.05 | 7.34             | 32.54 | 0.084            | 52.47 | 2.63             |
| KO        | Total    | 0.0137            | 44.22 | 12.31 | 7.41             | 22.98 | 0.098            | 45.19 | 2.74             |
| KO        | mRNA     | 0                 | 133.3 | 95.84 | 1.59             | 46.28 | 0.061            | 71.17 | 0.13             |
| KO        | mRNA     | 0                 | 134.5 | 95.86 | 1.48             | 54.66 | 0.047            | 83.4  | 0.18             |
| KO        | mRNA     | 0                 | 129.0 | 92.67 | 1.37             | 4.99  | 0.050            | 17.87 | 0.025            |
| WT        | Total    | 0.0231            | 46.69 | 14.67 | 59.42            | 17.07 | 0.125            | 46.49 | 1.78             |
| WT        | Total    | 0.0217            | 53.02 | 12.61 | 56.93            | 16.33 | 0.107            | 44.63 | 2.13             |
| WT        | Total    | 0.0174            | 28.36 | 14.41 | 64.97            | 14.23 | 0.138            | 42.70 | 1.57             |
| WT        | mRNA     | 0                 | 126.3 | 104.9 | 6.02             | 33.04 | 0.070            | 67.43 | 0.089            |
| WT        | mRNA     | 0                 | 79.65 | 61.74 | 5.14             | 19.88 | 0.071            | 40.89 | 0.090            |
| WT        | mRNA     | 0                 | 87.09 | 57.68 | 5.20             | 11.56 | 0.073            | 30.24 | 0.090            |

**Supplementary Table 12.** Nucleoside concentration (ng/mL) in total and small RNA of WT HEK 293T and NSUN2 KO cells measured by LC-QQQ-MS. Experiments were performed in triplicate. Nucleosides marked with † were quantified in 200 ng of RNA. All others were quantified in 1 ng of RNA. Raw values correspond to data of Fig. 3F in the main text.

| Cell Line | RNA type | hm <sup>5</sup> C <sup>†</sup> | C      | U      | m <sup>5</sup> C | A      | f <sup>5</sup> C <sup>†</sup> | G      | i6A <sup>†</sup> |
|-----------|----------|--------------------------------|--------|--------|------------------|--------|-------------------------------|--------|------------------|
| KO        | Total    | 0.107                          | 393.82 | 220.13 | 0.583            | 368.66 | 0.395                         | 758.47 | 17.917           |
| KO        | Total    | 0.121                          | 398.96 | 224.96 | 0.693            | 360.71 | 0.462                         | 733.65 | 16.050           |
| KO        | Total    | 0.094                          | 403.99 | 227.79 | 0.569            | 360.01 | 0.388                         | 729.19 | 16.696           |
| KO        | Small    | 0.385                          | 294.11 | 179.27 | 2.352            | 267.15 | 0.291                         | 512.95 | 156.525          |
| KO        | Small    | 0.368                          | 291.49 | 177.50 | 1.905            | 252.83 | 0.268                         | 492.37 | 143.885          |
| KO        | Small    | 0.424                          | 272.51 | 169.00 | 2.289            | 242.53 | 0.280                         | 503.36 | 144.267          |
| WT        | Total    | 0.201                          | 375.44 | 208.82 | 2.997            | 314.92 | 0.429                         | 689.31 | 17.842           |
| WT        | Total    | 0.212                          | 384.72 | 210.96 | 2.911            | 303.79 | 0.414                         | 662.90 | 16.378           |
| WT        | Total    | 0.203                          | 385.27 | 213.94 | 3.085            | 291.50 | 0.431                         | 644.45 | 15.940           |
| WT        | Small    | 2.084                          | 296.47 | 192.94 | 19.16            | 200.63 | 0.907                         | 434.30 | 130.290          |
| WT        | Small    | 2.504                          | 284.58 | 184.92 | 18.72            | 176.93 | 0.977                         | 414.36 | 102.734          |
| WT        | Small    | 2.825                          | 293.87 | 187.81 | 17.05            | 209.14 | 0.979                         | 368.28 | 146.828          |

**Supplementary Table 13.** Nucleoside concentration (ng/mL) in total RNA and mRNA of WT HEK 293T and NSUN3 KO cells measured by LC-QQQ-MS. Experiments were performed in triplicate. Nucleosides marked with † were quantified in 200 ng of RNA. All others were quantified in 1 ng of RNA. Raw values correspond to data of Fig. 3G in the main text.

| Cell Line | RNA Type | hm5C <sup>†</sup> | C      | m5C               | U     | A      | f5C <sup>†</sup> | G      | i6A <sup>†</sup> |
|-----------|----------|-------------------|--------|-------------------|-------|--------|------------------|--------|------------------|
| KO        | Total    | 0.206             | 167.64 | 0.204             | 72.60 | 105.49 | 0.225            | 287.75 | 17.82            |
| KO        | Total    | 0.224             | 151.96 | 0.194             | 64.22 | 101.31 | 0.201            | 262.33 | 16.25            |
| KO        | Total    | 0.209             | 178.89 | 0.240             | 75.74 | 120.96 | 0.209            | 313.67 | 18.78            |
| KO        | mRNA     | 0.000             | 120.70 | 4.97 <sup>†</sup> | 90.78 | 127.90 | 0.053            | 199.21 | 0.511            |
| KO        | mRNA     | 0.000             | 87.539 | 3.60 <sup>†</sup> | 68.83 | 92.82  | 0.043            | 145.31 | 0.439            |
| KO        | mRNA     | 0.000             | 73.248 | 3.62 <sup>†</sup> | 56.87 | 73.76  | 0.042            | 118.83 | 0.414            |
| WT        | Total    | 0.257             | 179.35 | 0.242             | 77.66 | 121.99 | 0.410            | 318.17 | 18.09            |
| WT        | Total    | 0.282             | 212.74 | 0.224             | 89.48 | 141.31 | 0.485            | 368.46 | 19.45            |
| WT        | Total    | 0.254             | 173.66 | 0.217             | 81.19 | 127.24 | 0.445            | 328.86 | 19.89            |
| WT        | mRNA     | 0.000             | 174.50 | 7.24 <sup>†</sup> | 123.0 | 175.64 | 0.163            | 293.91 | 0.442            |
| WT        | mRNA     | 0.000             | 81.657 | 3.12 <sup>†</sup> | 59.29 | 177.67 | 0.090            | 133.95 | 0.558            |
| WT        | mRNA     | 0.000             | 112.8  | 3.96 <sup>†</sup> | 80.80 | 108.10 | 0.103            | 182.11 | 0.478            |

**Supplementary Table 14.** Nucleoside concentration (ng/mL) in total and small RNA of WT HEK 293T and NSUN3 KO cells measured by LC-QQQ-MS. Experiments were performed in triplicate. Nucleosides marked with † were quantified in 200 ng of RNA. All others were quantified in 1 ng of RNA. Raw values correspond to data of Fig. 3G in the main text.

| Cell Line | RNA Type | hm5C <sup>†</sup> | C      | U     | m5C   | A      | f5C <sup>†</sup> | G      | i6A <sup>†</sup> |
|-----------|----------|-------------------|--------|-------|-------|--------|------------------|--------|------------------|
| KO        | Total    | 0.2565            | 165.64 | 73.46 | 2.043 | 112.62 | 0.238            | 289.86 | 15.79            |
| KO        | Total    | 0.171             | 158.82 | 68.91 | 1.501 | 105.98 | 0.227            | 274.22 | 16.19            |
| KO        | Total    | 0.2074            | 181.46 | 82.84 | 2.059 | 113.95 | 0.223            | 307.37 | 17.29            |
| KO        | Small    | 2.1472            | 179.03 | 89.46 | 12.58 | 134.53 | 1.117            | 309.97 | 0.724            |
| KO        | Small    | 2.1101            | 188.96 | 95.79 | 12.27 | 145.24 | 1.144            | 333.99 | 0.732            |
| KO        | Small    | 1.8802            | 180.19 | 93.53 | 13.21 | 137.64 | 1.041            | 317.96 | 0.714            |
| WT        | Total    | 0.237             | 178.83 | 79.35 | 2.094 | 119.82 | 0.415            | 309.23 | 17.06            |
| WT        | Total    | 0.2917            | 171.43 | 75.92 | 1.851 | 113.33 | 0.390            | 293.85 | 17.76            |
| WT        | Total    | 0.2811            | 176.12 | 76.87 | 2.095 | 115.54 | 0.407            | 299.21 | 15.55            |
| WT        | Small    | 2.9448            | 181.61 | 86.89 | 12.81 | 134.73 | 1.084            | 311.28 | 0.728            |
| WT        | Small    | 2.8748            | 172.69 | 81.62 | 12.45 | 126.27 | 1.030            | 293.21 | 0.668            |
| WT        | Small    | 2.6429            | 186.68 | 87.42 | 12.95 | 133.99 | 1.058            | 310.47 | 0.711            |

**Supplementary Table 15.** m<sup>1</sup>A Nucleoside concentration (ng/mL) in total RNA and small of WT HEK 293T and ALKBH1 cells under stress measured by LC-QQQ-MS.N.T., no treatment; H.S., heat shock (42 °C for 1 hour); Gluc., glucose deprivation (5 mM glucose for 8 hours); Ars. high, oxidative stress (0.5 mM NaAsO<sub>2</sub> for 1 hour); Ars. low, oxidative stress (0.2 mM NaAsO<sub>2</sub> for 4 hour). Experiments were performed in triplicate. Nucleosides marked with † were quantified in 200 ng of RNA. All others were quantified in 1 ng of RNA. Raw values correspond to the data of Supplementary Figs. 24-25.

| Cell Line | RNA Type | C     | m5C   | U     | A     | G     | m1A   | i6A   | f5C <sup>†</sup> | treatment |
|-----------|----------|-------|-------|-------|-------|-------|-------|-------|------------------|-----------|
| WT        | total    | 561.1 | 4.08  | 227.2 | 156.0 | 516.5 | 2.18  | 17.8  | 0.1882           | none      |
| WT        | total    | 531.5 | 4.90  | 273.9 | 228.0 | 602.1 | 2.02  | 21.2  | 0.1686           | none      |
| WT        | total    | 408.0 | 3.56  | 213.1 | 169.1 | 602.1 | 1.44  | 13.4  | 0.147            | none      |
| KO        | total    | 387.5 | 2.88  | 187.3 | 290.3 | 602.2 | 1.58  | 15.8  | 0.0121           | none      |
| KO        | total    | 417.8 | 3.72  | 209.1 | 314.1 | 653.4 | 1.91  | 18.2  | 0.0123           | none      |
| KO        | total    | 345.1 | 3.07  | 169.1 | 244.8 | 653.4 | 1.39  | 13.3  | 0.0156           | none      |
| WT        | small    | 252.6 | 20.30 | 141.6 | 98.1  | 369.4 | 6.60  | 91.9  | 0.3174           | none      |
| WT        | small    | 299.2 | 24.11 | 163.9 | 100.2 | 323.6 | 7.97  | 136.4 | 0.397            | none      |
| WT        | small    | 200.6 | 16.16 | 108.5 | 80.4  | 323.6 | 4.26  | 149.7 | 0.218            | none      |
| KO        | small    | 234.9 | 16.71 | 127.5 | 159.4 | 329.3 | 10.09 | 102.9 | 0.0661           | none      |
| KO        | small    | 294.3 | 23.02 | 164.9 | 164.4 | 380.5 | 12.41 | 133.1 | 0.0392           | none      |
| KO        | small    | 235.1 | 17.74 | 129.4 | 130.0 | 380.5 | 9.42  | 150.8 | 0.0639           | none      |
| WT        | total    | 368.7 | 3.90  | 182.1 | 181.7 | 448.0 | 1.83  | 17.7  | 0.1358           | H.S.      |
| WT        | total    | 407.5 | 3.74  | 200.0 | 223.5 | 216.9 | 1.91  | 14.6  | 0.1169           | H.S.      |
| WT        | total    | 370.0 | 3.66  | 182.7 | 170.4 | 216.9 | 1.41  | 12.3  | 0.122            | H.S.      |
| KO        | total    | 366.5 | 3.62  | 173.8 | 273.3 | 575.5 | 1.70  | 18.2  | 0.0142           | H.S.      |
| KO        | total    | 411.8 | 3.92  | 203.3 | 302.2 | 637.6 | 2.06  | 21.4  | 0.0114           | H.S.      |
| KO        | total    | 353.5 | 3.49  | 171.3 | 250.4 | 637.6 | 1.43  | 13.5  | 0.0132           | H.S.      |
| WT        | small    | 114.9 | 15.24 | 84.8  | 98.2  | 200.5 | 1.90  | 143.3 | 0.1618           | H.S.      |
| WT        | small    | 290.5 | 24.23 | 159.4 | 124.5 | 152.3 | 4.67  | 113.2 | 0.3515           | H.S.      |
| WT        | small    | 291.3 | 23.95 | 165.0 | 113.5 | 120.5 | 4.69  | 179.7 | 0.3684           | H.S.      |
| KO        | small    | 304.0 | 24.35 | 163.6 | 186.2 | 423.1 | 13.52 | 92.9  | 0.082            | H.S.      |
| KO        | small    | 328.3 | 26.75 | 177.6 | 164.0 | 397.7 | 14.37 | 154.4 | 0.0445           | H.S.      |
| KO        | small    | 280.5 | 20.86 | 153.4 | 153.5 | 397.7 | 11.94 | 192.5 | 0.0532           | H.S.      |
| WT        | total    | 428.2 | 3.73  | 216.4 | 187.4 | 329.2 | 1.65  | 15.3  | 0.1523           | Ars. low  |
| WT        | total    | 458.8 | 4.56  | 230.9 | 190.4 | 297.4 | 2.05  | 17.0  | 0.1683           | Ars. low  |
| WT        | total    | 329.3 | 3.10  | 164.4 | 160.4 | 300.8 | 1.53  | 13.4  | 0.118            | Ars. low  |
| KO        | total    | 366.5 | 3.46  | 178.4 | 271.1 | 569.6 | 1.62  | 16.5  | 0.0146           | Ars. low  |
| KO        | total    | 398.3 | 3.69  | 200.1 | 253.7 | 578.2 | 1.95  | 19.5  | 0.0099           | Ars. low  |
| KO        | total    | 339.8 | 3.07  | 172.2 | 220.8 | 578.2 | 1.29  | 13.2  | 0.0119           | Ars. low  |
| WT        | small    | 312.1 | 22.36 | 176.3 | 120.9 | 392.2 | 4.11  | 143.3 | 0.3882           | Ars. low  |

|    |       |       |       |       |       |       |       |       |        |           |
|----|-------|-------|-------|-------|-------|-------|-------|-------|--------|-----------|
| WT | small | 299.7 | 20.60 | 171.2 | 111.3 | 250.4 | 3.47  | 106.5 | 0.3732 | Ars. low  |
| WT | small | 326.2 | 24.46 | 188.3 | 125.6 | 322.7 | 4.55  | 208.0 | 0.3851 | Ars. low  |
| KO | small | 356.8 | 26.10 | 197.2 | 298.0 | 578.0 | 14.74 | 149.5 | 0.0805 | Ars. low  |
| KO | small | 300.9 | 21.48 | 170.1 | 178.9 | 406.5 | 11.88 | 122.1 | 0.0943 | Ars. low  |
| KO | small | 351.7 | 25.78 | 191.9 | 123.1 | 406.5 | 13.45 | 192.9 | 0.0932 | Ars. low  |
| WT | total | 439.0 | 4.48  | 219.2 | 269.2 | 461.6 | 1.72  | 18.4  | 0.1525 | Ars. high |
| WT | total | 389.9 | 3.72  | 197.9 | 263.6 | 429.9 | 1.40  | 13.7  | 0.1071 | Ars. high |
| WT | total | 234.0 | 2.29  | 324.4 | 197.4 | 309.9 | 1.08  | 13.0  | 0.088  | Ars. high |
| KO | total | 402.1 | 3.88  | 198.5 | 296.1 | 621.6 | 1.83  | 17.5  | 0.0144 | Ars. high |
| KO | total | 393.2 | 3.75  | 196.2 | 262.1 | 572.4 | 1.87  | 19.2  | 0.012  | Ars. high |
| KO | total | 354.6 | 3.22  | 174.3 | 240.5 | 572.4 | 1.50  | 14.1  | 0.0127 | Ars. high |
| WT | small | 247.9 | 19.39 | 139.6 | 147.3 | 290.2 | 3.12  | 144.7 | 0.2993 | Ars. high |
| WT | small | 312.4 | 23.56 | 180.9 | 198.3 | 356.6 | 4.70  | 113.6 | 0.4271 | Ars. high |
| WT | small | 280.4 | 22.43 | 161.1 | 246.3 | 302.5 | 2.90  | 146.6 | 0.3255 | Ars. high |
| KO | small | 278.7 | 20.24 | 155.7 | 153.3 | 349.2 | 11.30 | 125.5 | 0.0853 | Ars. high |
| KO | small | 174.5 | 12.75 | 100.2 | 148.2 | 288.0 | 6.46  | 71.1  | 0.0364 | Ars. high |
| KO | small | 277.0 | 18.51 | 155.3 | 184.2 | 387.1 | 10.71 | 161.3 | 0.0786 | Ars. high |
| WT | total | 434.4 | 4.11  | 215.7 | 195.6 | 495.5 | 1.94  | 17.0  | 0.1578 | Gluc.     |
| WT | total | 437.7 | 4.27  | 221.5 | 189.5 | 379.1 | 1.95  | 17.6  | 0.1441 | Gluc.     |
| WT | total | 400.0 | 3.43  | 199.0 | 172.0 | 307.1 | 1.54  | 11.8  | 0.133  | Gluc.     |
| KO | total | 350.1 | 3.31  | 172.6 | 266.5 | 560.3 | 1.54  | 16.5  | 0.0091 | Gluc.     |
| KO | total | 387.2 | 3.27  | 192.8 | 266.6 | 576.5 | 1.80  | 18.6  | 0.0127 | Gluc.     |
| KO | total | 363.0 | 3.30  | 178.1 | 252.2 | 576.5 | 1.59  | 12.1  | 0.013  | Gluc.     |
| WT | small | 341.9 | 28.58 | 196.6 | 184.4 | 411.3 | 3.69  | 151.7 | 0.4632 | Gluc.     |
| WT | small | 299.4 | 24.51 | 168.5 | 167.4 | 428.0 | 3.72  | 137.7 | 0.4227 | Gluc.     |
| WT | small | 320.4 | 26.53 | 178.2 | 190.4 | 421.3 | 4.42  | 238.9 | 0.3255 | Gluc.     |
| KO | small | 335.8 | 26.27 | 183.6 | 264.5 | 507.3 | 14.66 | 144.5 | 0.0742 | Gluc.     |
| KO | small | 433.6 | 34.87 | 251.1 | 235.2 | 546.5 | 18.62 | 183.9 | 0.0887 | Gluc.     |
| KO | small | 332.5 | 25.42 | 180.0 | 150.4 | 546.5 | 13.70 | 192.2 | 0.0835 | Gluc.     |

**Supplementary Table 16.** Quantification of f<sup>5</sup>C and hm<sup>5</sup>C (ng/mL) content in native tRNAs isolated from WT or ALKBH1 KO cells. Nucleoside levels were measured in 100-600 ng RNA by LC-QQQ-MS. Values correspond to Fig. 5B-G in main text. Nucleosides marked with † were recorded from injections with 24x more material. Values correspond to Fig. 6B-G in main text.

| tRNA    | Cell Line | hm5C              | C      | U      | m5C   | A      | f5C               | G      | i6A  |
|---------|-----------|-------------------|--------|--------|-------|--------|-------------------|--------|------|
| Leu CAA | KO        | 0.41 <sup>†</sup> | 988.92 | 240.40 | 31.06 | 480.77 | 0.08 <sup>†</sup> | 1016.1 | 0.96 |
| Leu CAA | KO        | 0.35 <sup>†</sup> | 959.98 | 236.79 | 32.67 | 464.79 | 0.08 <sup>†</sup> | 996.9  | 0.99 |
| Leu CAA | KO        | 0.29 <sup>†</sup> | 919.46 | 236.06 | 24.68 | 459.08 | 0.09 <sup>†</sup> | 982.2  | 0.98 |
| Leu CAA | WT        | 3.71 <sup>†</sup> | 1264.9 | 256.59 | 35.84 | 500.67 | 0.65 <sup>†</sup> | 1111.4 | 1.28 |
| Leu CAA | WT        | 3.57 <sup>†</sup> | 1275.3 | 254.28 | 34.12 | 500.43 | 0.75 <sup>†</sup> | 1105.9 | 1.19 |
| Leu CAA | WT        | 3.72 <sup>†</sup> | 1218.3 | 254.49 | 34.29 | 507.86 | 0.56 <sup>†</sup> | 1109.2 | 1.17 |
| mt-Met  | KO        | 0.09              | 113.90 | 83.59  | 5.12  | 56.82  | 0.09              | 161.74 | 0.37 |
| mt-Met  | KO        | 0.12              | 110.18 | 79.25  | 4.67  | 57.72  | 0.07              | 156.72 | 0.40 |
| mt-Met  | KO        | 0.08              | 123.02 | 61.91  | 4.68  | 49.95  | 0.07              | 129.45 | 0.29 |
| mt-Met  | WT        | 0.22              | 102.72 | 85.69  | 3.64  | 61.97  | 1.88              | 144.96 | 0.38 |
| mt-Met  | WT        | 0.31              | 103.40 | 84.85  | 3.50  | 64.33  | 1.81              | 145.42 | 0.37 |
| mt-Met  | WT        | 0.23              | 106.25 | 62.52  | 2.77  | 49.91  | 1.47              | 111.81 | 0.24 |
| Val CAC | KO        | 0.03              | 100.54 | 140.43 | 3.96  | 201.47 | 0.11              | 355.97 | 0.04 |
| Val CAC | KO        | 0.05              | 95.26  | 143.73 | 3.44  | 200.07 | 0.11              | 352.66 | 0.04 |
| Val CAC | KO        | 0.04              | 99.81  | 148.75 | 3.16  | 212.73 | 0.10              | 362.09 | 0.06 |
| Val CAC | WT        | 0.02              | 76.11  | 125.91 | 2.10  | 189.83 | 0.07              | 331.19 | 0.10 |
| Val CAC | WT        | 0.03              | 85.30  | 132.90 | 2.91  | 207.83 | 0.10              | 338.22 | 0.09 |
| Val CAC | WT        | 0.04              | 93.54  | 143.28 | 3.06  | 235.44 | 0.09              | 339.04 | 0.10 |
| Glu CTC | KO        | 0.00              | 1140.2 | 708.18 | 7.57  | 335.36 | 0.36              | 1647.0 | 0.28 |
| Glu CTC | KO        | 0.00              | 1210.8 | 1094.1 | 10.50 | 581.27 | 0.41              | 2795.5 | 0.20 |
| Glu CTC | KO        | 0.00              | 141.15 | 422.75 | 0.98  | 234.55 | 0.05              | 967.12 | 0.22 |
| Glu CTC | WT        | 0.00              | 520.59 | 300.48 | 3.12  | 225.86 | 0.23              | 738.73 | 0.25 |
| Glu CTC | WT        | 0.00              | 585.25 | 489.55 | 4.95  | 243.33 | 0.29              | 1270.1 | 0.81 |
| Glu CTC | WT        | 0.00              | 153.12 | 479.13 | 1.12  | 277.18 | 0.07              | 1242.3 | 0.27 |
| Gly CCC | KO        | 0.00              | 250.85 | 258.30 | 2.56  | 127.59 | 0.26              | 527.64 | 0.27 |
| Gly CCC | KO        | 0.00              | 360.71 | 425.39 | 1.80  | 230.43 | 0.28              | 895.29 | 0.20 |
| Gly CCC | KO        | 0.00              | 59.86  | 204.64 | 0.21  | 111.63 | 0.05              | 433.38 | 0.32 |
| Gly CCC | WT        | 0.00              | 136.95 | 193.03 | 0.42  | 82.51  | 0.26              | 336.67 | 0.48 |
| Gly CCC | WT        | 0.00              | 140.99 | 308.25 | 0.68  | 136.46 | 0.21              | 562.69 | 0.45 |
| Gly CCC | WT        | 0.00              | 48.80  | 202.66 | 0.15  | 117.45 | 0.07              | 479.18 | 0.45 |
| Gln CTG | KO        | 0.00              | 435.16 | 397.24 | 2.82  | 268.50 | 0.16              | 725.22 | 0.32 |
| Gln CTG | KO        | 0.00              | 498.91 | 648.17 | 2.28  | 563.49 | 0.21              | 1448.4 | 0.22 |



|         |    |      |        |        |      |        |      |        |      |
|---------|----|------|--------|--------|------|--------|------|--------|------|
| Gln CTG | KO | 0.00 | 80.20  | 284.24 | 0.42 | 224.15 | 0.04 | 556.34 | 0.24 |
| Gln CTG | WT | 0.00 | 374.17 | 328.32 | 1.86 | 215.72 | 0.15 | 579.98 | 0.30 |
| Gln CTG | WT | 0.00 | 400.32 | 519.08 | 2.25 | 371.06 | 0.19 | 1002.6 | 0.26 |
| Gln CTG | WT | 0.00 | 90.73  | 343.58 | 0.49 | 272.67 | 0.03 | 668.84 | 0.24 |

**Supplementary Table 17.** Sequences of labeled probes for tRNA antisense pulldown and northern blotting. Bio = biotin.

| RNA           | Sequence                                     |
|---------------|----------------------------------------------|
| mt-tRNA-Met   | 5' Bio-TGGTAGTACGGGAAGGGTATAACCAACATT        |
| tRNA-Leu-CAA  | 5' Bio-GAGTCTGGCGCCTTAGACCACTCGGCCATCCTGAC   |
| tRNA-Glu-CTC  | 5' Bio-TTCCCTGACCGGGAATCGAACCCGGGCCG         |
| tRNA-Gly-CCC  | 5' Bio-GGAGGCGAGAATTCTACCACTGAACCACCAATGC    |
| tRNA-Gln-CTG  | 5' Bio-AGGTCCCACCGAGATTTGAACTCGGATCGCTGG     |
| tRNA-Val-CAC  | 5' Bio-TGTTTCCGCCCAGTTTCGAACCGGGGACCTTTCGCGT |
| tRNA-iMet-CAT | 5' Bio-TAGCAGAGGATGGTTTTCGATCCATCA           |
| tRNA-Leu-CAG  | 5' Bio-GCGCCTTAGACCGCTCGGCCATCCTGAC          |
| tRNA-Trp-CCA  | 5' Bio-TGACCCCGACGTGATTTGAACACGCAACCT        |
| tRNA-Lys-CTT  | 5' Bio-CCAACGTGGGGCTCGAACCCACGACCCT          |
| tRNA-Gly-GCA  | 5' Bio-AGTCAAATGCTCTACCACTGAGCTATACCCCC      |
| tRNA-eMet-CAT | 5' Bio-TGCCCCGTGTGAGGATCGAACTCACGACCT        |
| tRNA-Arg-CCT  | 5' Bio-CACCCCAGGTGGGACTCGAACCCACAAT          |
| 5S RNA        | 5' FAM-AAAGCCTACAGCACCCGGTAT                 |

**Supplementary Table 18.** Generation of f<sup>5</sup>C and hm<sup>5</sup>C (ng/mL) in tRNA ASL substrates after oxidation with ALKBH1 *in vitro*. Nucleoside levels were measured by LC-QQQ-MS. Values correspond to Fig. 7C in main text.

| ASL      | Enz. | hm5C | C      | m5C   | U      | A      | f5C    | G      |
|----------|------|------|--------|-------|--------|--------|--------|--------|
| iMet CAT | –    | 0    | 66.4   | 19.23 | 49.50  | 100.01 | 0      | 103.98 |
| iMet CAT | –    | 0    | 66.11  | 19.94 | 48.43  | 96.46  | 0      | 103.04 |
| iMet CAT | –    | 0    | 65.92  | 18.89 | 48.55  | 95.16  | 0      | 101.65 |
| iMet CAT | +    | 1.20 | 38.83  | 7.87  | 28.72  | 58.47  | 1.085  | 58.56  |
| iMet CAT | +    | 1.84 | 38.45  | 7.78  | 28.71  | 57.25  | 1.208  | 58.62  |
| iMet CAT | +    | 1.12 | 38.42  | 7.93  | 28.98  | 55.93  | 1.100  | 57.52  |
| Val CAC  | –    | 0    | 114.29 | 25.4  | 73.52  | 145.61 | 0      | 126.28 |
| Val CAC  | –    | 0    | 113.80 | 25.71 | 73.48  | 141.86 | 0      | 124.21 |
| Val CAC  | –    | 0    | 114.80 | 27.44 | 73.23  | 139.50 | 0      | 123.94 |
| Val CAC  | +    | 3.63 | 55.24  | 6.30  | 35.49  | 72.39  | 4.141  | 60.23  |
| Val CAC  | +    | 2.56 | 55.70  | 6.17  | 35.84  | 71.61  | 4.203  | 59.44  |
| Val CAC  | +    | 2.52 | 56.50  | 6.16  | 36.27  | 70.79  | 4.141  | 59.32  |
| Leu CAA  | –    | 0    | 7.26   | 6.88  | 22.74  | 21.92  | 0      | 40.14  |
| Leu CAA  | –    | 0    | 7.62   | 5.93  | 23.38  | 21.75  | 0      | 39.45  |
| Leu CAA  | –    | 0    | 7.60   | 6.28  | 24.08  | 21.67  | 0      | 39.51  |
| Leu CAA  | +    | 5.20 | 35.29  | 9.12  | 65.91  | 78.74  | 3.801  | 111.50 |
| Leu CAA  | +    | 4.84 | 35.68  | 9.33  | 67.61  | 77.51  | 3.095  | 108.67 |
| Leu CAA  | +    | 5.12 | 35.76  | 9.33  | 66.79  | 76.00  | 3.419  | 107.23 |
| Gln CTG  | –    | 0    | 2.67   | 2.08  | 9.88   | 9.75   | 0.028  | 14.28  |
| Gln CTG  | –    | 0    | 4.23   | 1.91  | 9.91   | 9.33   | 0.038  | 13.70  |
| Gln CTG  | –    | 0    | 4.53   | 2.47  | 10.65  | 10.43  | 0.0414 | 15.24  |
| Gln CTG  | +    | 0.16 | 1.35   | 5.65  | 20.01  | 30.99  | 0.600  | 30.12  |
| Gln CTG  | +    | 0.17 | 0.98   | 5.05  | 17.79  | 26.67  | 0.555  | 25.97  |
| Gln CTG  | +    | 0.15 | 0.92   | 5.02  | 18.45  | 25.73  | 0.421  | 24.58  |
| Glu CTC  | –    | 0    | 5.24   | 2.37  | 9.76   | 2.85   | 0.042  | 19.88  |
| Glu CTC  | –    | 0    | 2.35   | 1.21  | 5.37   | 1.26   | 0.018  | 9.54   |
| Glu CTC  | –    | 0    | 4.25   | 1.44  | 8.28   | 1.54   | 0.022  | 10.25  |
| Glu CTC  | +    | 0.91 | 3.36   | 3.84  | 12.51  | 7.38   | 1.508  | 27.66  |
| Glu CTC  | +    | 0.91 | 6.36   | 3.71  | 14.00  | 6.13   | 1.510  | 32.67  |
| Glu CTC  | +    | 1.13 | 7.18   | 4.25  | 18.48  | 7.25   | 2.005  | 43.25  |
| Gly CCC  | –    | 0    | 181.02 | 51.72 | 182.76 | 106.48 | 0.169  | 524.57 |
| Gly CCC  | –    | 0    | 228.17 | 64.90 | 214.44 | 144.48 | 0.190  | 608.86 |
| Gly CCC  | –    | 0    | 203.57 | 59.35 | 201.57 | 122.35 | 0.174  | 500.22 |
| Gly CCC  | +    | 31.9 | 290.86 | 48.17 | 264.00 | 317.57 | 48.81  | 729.06 |
| Gly CCC  | +    | 35.6 | 292.63 | 60.23 | 278.56 | 330.88 | 46.24  | 759.72 |

|         |   |      |        |       |        |        |        |        |
|---------|---|------|--------|-------|--------|--------|--------|--------|
| Gly CCC | + | 28.7 | 250.53 | 50.5  | 250.53 | 300.56 | 36.57  | 600.25 |
| Leu CAG | - | 0    | 1.58   | 4.44  | 19.53  | 9.77   | 0.165  | 51.77  |
| Leu CAG | - | 0    | 1.52   | 2.25  | 9.82   | 3.96   | 0.063  | 24.08  |
| Leu CAG | - | 0    | 0.38   | 1.14  | 7.36   | 2.45   | 0.044  | 18.76  |
| Leu CAG | + | 4.65 | 13.38  | 8.36  | 44.08  | 45.87  | 6.605  | 121.83 |
| Leu CAG | + | 1.21 | 4.35   | 2.37  | 14.13  | 11.49  | 1.545  | 35.51  |
| Leu CAG | + | 2.65 | 3.58   | 4.92  | 34.42  | 27.57  | 3.485  | 70.27  |
| mt-Met  | - | 0    | 51.21  | 32.64 | 56.85  | 160.08 | 0.314  | 143.43 |
| mt-Met  | - | 0    | 38.61  | 28.63 | 44.34  | 141.29 | 0.215  | 118.09 |
| mt-Met  | - | 0    | 40.85  | 25.55 | 42.47  | 130.74 | 0.201  | 111.47 |
| mt-Met  | + | 3.62 | 58.60  | 20.73 | 61.00  | 195.09 | 10.853 | 158.96 |
| mt-Met  | + | 0.59 | 3.69   | 3.27  | 10.42  | 27.20  | 1.234  | 23.64  |
| mt-Met  | + | 3.24 | 16.27  | 18.27 | 50.27  | 150.25 | 8.352  | 100.54 |

**Supplementary Table 19.** ca<sup>5</sup>C nucleoside concentration (ng/mL) in various tRNA ASLs after *in vitro* oxidation with ALKBH1 as measured by LC-QQQ-MS. Experiments were performed in triplicate. Raw values correspond to the data of Supplementary Fig. 22

| ASL     | ALKBH1 | hm5C | C     | ca5C | m5C  | U     | A     | f5C  | G     |
|---------|--------|------|-------|------|------|-------|-------|------|-------|
| mt-Met  | No     | 0    | 90.4  | 0    | 22.2 | 47.7  | 111.9 | 0    | 171.3 |
| mt-Met  | No     | 0    | 112.2 | 0    | 25.1 | 55.5  | 136.5 | 0    | 198.0 |
| mt-Met  | No     | 0    | 120.1 | 0    | 28.4 | 60.1  | 145.8 | 0    | 209.5 |
| Leu CAA | No     | 0    | 22.8  | 0    | 7.84 | 25.5  | 35.5  | 0    | 98.0  |
| Leu CAA | No     | 0    | 18.2  | 0    | 8.20 | 21.5  | 33.2  | 0    | 91.6  |
| Leu CAA | No     | 0    | 16.3  | 0    | 6.11 | 15.4  | 25.2  | 0    | 81.0  |
| Val CAC | No     | 0    | 31.6  | 0    | 7.82 | 17.3  | 41.8  | 0    | 87.9  |
| Val CAC | No     | 0    | 39.4  | 0    | 9.44 | 22.3  | 50.6  | 0    | 97.7  |
| Val CAC | No     | 0    | 32.8  | 0    | 7.60 | 17.0  | 39.5  | 0    | 86.8  |
| mt-Met  | Yes    | 4.95 | 164.8 | 0    | 21.6 | 81.4  | 184.0 | 11.0 | 251.7 |
| mt-Met  | Yes    | 3.97 | 128.1 | 0    | 13.9 | 63.8  | 146.4 | 11.0 | 208.2 |
| mt-Met  | Yes    | 15.9 | 457.3 | 0    | 59.3 | 234.7 | 514.0 | 29.6 | 638.8 |
| Leu CAA | Yes    | 1.59 | 12.2  | 0    | 2.27 | 16.7  | 23.4  | 0.84 | 77.1  |
| Leu CAA | Yes    | 1.52 | 12.2  | 0    | 2.16 | 15.1  | 23.8  | 0.85 | 74.2  |
| Leu CAA | Yes    | 1.93 | 17.9  | 0    | 3.00 | 22.9  | 30.2  | 0.89 | 87.5  |
| Val CAC | Yes    | 7.43 | 132.9 | 0    | 10.0 | 66.9  | 149.0 | 9.58 | 187.8 |
| Val CAC | Yes    | 0.62 | 12.2  | 0    | 1.18 | 6.47  | 15.9  | 0.99 | 56.9  |
| Val CAC | Yes    | 2.08 | 39.3  | 0    | 3.05 | 21.5  | 45.4  | 2.75 | 90.8  |

**Supplementary Table 20.** Generation of f<sup>5</sup>C and hm<sup>5</sup>C (ng/mL) and decrease of m<sup>5</sup>C in substrates **3-5** after oxidation with ALKBH1 *in vitro*. Nucleoside levels were measured by LC-QQQ-MS. The ASL of mt-tRNA-Met (mt-Met) is included as a positive control. Values correspond to Fig. 7E in main text.

| Substrate | Enz | hm5C | C       | U       | m5C    | A       | f5C  | G       |
|-----------|-----|------|---------|---------|--------|---------|------|---------|
| <b>3</b>  | No  | 0.00 | 107.90  | 92.86   | 43.15  | 278.08  | 0.00 | 127.34  |
| <b>3</b>  | No  | 0.00 | 106.93  | 92.07   | 42.01  | 269.61  | 0.00 | 122.12  |
| <b>3</b>  | No  | 0.00 | 106.50  | 90.62   | 42.20  | 265.65  | 0.00 | 120.04  |
| <b>4</b>  | No  | 0.00 | 224.85  | 313.30  | 74.63  | 388.05  | 0.00 | 244.49  |
| <b>4</b>  | No  | 0.00 | 223.55  | 307.20  | 74.49  | 382.95  | 0.00 | 242.03  |
| <b>4</b>  | No  | 0.00 | 224.16  | 310.75  | 75.10  | 385.15  | 0.00 | 243.56  |
| <b>5</b>  | No  | 0.00 | 2706.02 | 4585.14 | 645.67 | 2848.96 | 0.00 | 5961.24 |
| <b>5</b>  | No  | 0.00 | 2523.48 | 4234.43 | 606.83 | 2697.73 | 0.00 | 5623.73 |
| <b>5</b>  | No  | 0.00 | 2307.67 | 4890.04 | 519.41 | 2627.61 | 0.00 | 5364.60 |
| mt-Met    | No  | 0.00 | 71.18   | 62.74   | 21.89  | 122.07  | 0.00 | 114.00  |
| mt-Met    | No  | 0.00 | 71.35   | 62.70   | 21.51  | 121.48  | 0.00 | 113.48  |
| mt-Met    | No  | 0.00 | 72.22   | 63.27   | 22.20  | 121.19  | 0.00 | 112.04  |
| <b>3</b>  | Yes | 3.57 | 89.38   | 77.18   | 27.66  | 236.33  | 0.93 | 102.71  |
| <b>3</b>  | Yes | 3.09 | 88.75   | 77.28   | 27.54  | 236.02  | 0.85 | 102.20  |
| <b>3</b>  | Yes | 3.15 | 89.03   | 76.95   | 27.90  | 235.53  | 0.84 | 102.33  |
| <b>4</b>  | Yes | 0.19 | 171.30  | 224.79  | 51.24  | 279.13  | 0.05 | 175.46  |
| <b>4</b>  | Yes | 0.12 | 170.42  | 218.17  | 52.18  | 278.46  | 0.07 | 175.30  |
| <b>4</b>  | Yes | 0.17 | 172.25  | 225.71  | 54.39  | 278.48  | 0.05 | 172.99  |
| <b>5</b>  | Yes | 3.34 | 2793.24 | 4859.18 | 654.11 | 2731.75 | 1.76 | 5403.80 |
| <b>5</b>  | Yes | 3.73 | 2873.43 | 4897.33 | 643.54 | 2738.18 | 1.69 | 5431.68 |
| <b>5</b>  | Yes | 3.28 | 2864.30 | 4585.24 | 645.66 | 2658.31 | 1.73 | 5404.35 |
| mt-Met    | Yes | 4.28 | 49.48   | 42.14   | 9.69   | 88.49   | 1.63 | 72.50   |
| mt-Met    | Yes | 4.85 | 49.59   | 42.83   | 9.77   | 88.87   | 1.58 | 72.78   |
| mt-Met    | Yes | 4.84 | 49.89   | 43.92   | 9.77   | 89.09   | 1.79 | 73.45   |

**Supplementary Table 21.** Generation of f<sup>5</sup>C and hm<sup>5</sup>C (ng/mL) and decrease of m<sup>5</sup>C in substrates **6-8** after oxidation with ALKBH1 *in vitro*. Nucleoside levels were measured by LC-QQQ-MS. The ASL of mt-tRNA-Met (mt-Met) is included as a positive control. Values correspond to Fig. 7E in main text.

| Substrate | Enz. | hm5C | C     | U      | m5C   | A      | f5C  | G      |
|-----------|------|------|-------|--------|-------|--------|------|--------|
| 6         | no   | 0.00 | 0.00  | 1.67   | 0.58  | 1.114  | 0.00 | 7.75   |
| 6         | no   | 0.00 | 2.02  | 3.16   | 0.89  | 2.094  | 0.00 | 12.61  |
| 6         | no   | 0.00 | 1.95  | 2.38   | 0.68  | 1.584  | 0.00 | 10.14  |
| 7         | no   | 0.00 | 1.98  | 3.49   | 1.00  | 2.229  | 0.00 | 9.94   |
| 7         | no   | 0.00 | 12.17 | 3.73   | 1.10  | 2.507  | 0.00 | 124.61 |
| 7         | no   | 0.00 | 0.00  | 4.02   | 1.25  | 2.674  | 0.00 | 9.35   |
| 8         | no   | 0.00 | 2.05  | 3.92   | 1.23  | 2.623  | 0.00 | 11.47  |
| 8         | no   | 0.00 | 2.14  | 3.06   | 0.95  | 1.995  | 0.00 | 15.47  |
| 8         | no   | 0.00 | 0.00  | 1.59   | 0.45  | 1.100  | 0.00 | 7.74   |
| mt-Met    | no   | 0.00 | 20.81 | 74.84  | 22.12 | 50.20  | 0.29 | 95.05  |
| mt-Met    | no   | 0.00 | 44.69 | 128.71 | 43.39 | 86.15  | 0.37 | 209.56 |
| mt-Met    | no   | 0.00 | 0.00  | 10.55  | 3.55  | 7.039  | 0.07 | 26.30  |
| 6         | yes  | 0.00 | 2.28  | 3.40   | 0.97  | 2.453  | 0.00 | 14.65  |
| 6         | yes  | 0.00 | 12.34 | 4.40   | 1.27  | 2.944  | 0.00 | 118.96 |
| 6         | yes  | 0.00 | 0.00  | 8.30   | 2.58  | 5.522  | 0.00 | 10.73  |
| 7         | yes  | 0.00 | 2.59  | 3.04   | 1.03  | 1.990  | 0.00 | 14.81  |
| 7         | yes  | 0.00 | 2.47  | 3.21   | 0.93  | 2.175  | 0.00 | 12.25  |
| 7         | yes  | 0.00 | 0.00  | 4.16   | 1.21  | 2.774  | 0.00 | 11.21  |
| 8         | yes  | 0.00 | 2.32  | 3.40   | 0.86  | 2.305  | 0.13 | 13.81  |
| 8         | yes  | 0.00 | 3.39  | 3.05   | 0.88  | 2.048  | 0.14 | 20.43  |
| 8         | yes  | 0.00 | 0.00  | 3.18   | 0.82  | 2.106  | 0.11 | 9.79   |
| mt-Met    | yes  | 1.26 | 18.61 | 37.69  | 7.12  | 25.063 | 4.35 | 86.36  |
| mt-Met    | yes  | 1.57 | 23.08 | 41.72  | 7.54  | 28.356 | 4.13 | 104.25 |
| mt-Met    | yes  | 1.12 | 21.15 | 36.76  | 7.43  | 25.501 | 4.52 | 102.92 |

**Supplementary Table 22.** Fluc/Rluc normalized dual-luciferase assay signals detected in WT, ALKBH1 KO, or NSUN2 KO cell lines using different reporter constructs for Leu translation. Biological triplicates were analyzed. Values correspond to data in Supplementary Fig. 37.

| [Glucose] | Cell Line | Construct | Fluc/Rluc |
|-----------|-----------|-----------|-----------|
| 25 mM     | WT        | TTG       | 0.522593  |
| 25 mM     | WT        | TTG       | 0.500958  |
| 25 mM     | WT        | TTG       | 0.490108  |
| 25 mM     | WT        | TTA       | 0.496131  |
| 25 mM     | WT        | TTA       | 0.454656  |
| 25 mM     | WT        | TTA       | 0.533748  |
| 25 mM     | WT        | Random    | 0.441912  |
| 25 mM     | WT        | Random    | 0.559697  |
| 25 mM     | WT        | Random    | 0.567572  |
| 1 mM      | WT        | TTG       | 0.498829  |
| 1 mM      | WT        | TTG       | 0.450062  |
| 1 mM      | WT        | TTG       | 0.436086  |
| 1 mM      | WT        | TTA       | 0.450586  |
| 1 mM      | WT        | TTA       | 0.497583  |
| 1 mM      | WT        | TTA       | 0.516315  |
| 1 mM      | WT        | Random    | 0.530949  |
| 1 mM      | WT        | Random    | 0.513912  |
| 1 mM      | WT        | Random    | 0.468501  |
| 25 mM     | ALKBH1 KO | TTG       | 0.421198  |
| 25 mM     | ALKBH1 KO | TTG       | 0.537379  |
| 25 mM     | ALKBH1 KO | TTG       | 0.511532  |
| 25 mM     | ALKBH1 KO | TTA       | 0.452581  |
| 25 mM     | ALKBH1 KO | TTA       | 0.495098  |
| 25 mM     | ALKBH1 KO | TTA       | 0.50427   |
| 25 mM     | ALKBH1 KO | Random    | 0.563185  |
| 25 mM     | ALKBH1 KO | Random    | 0.556884  |
| 25 mM     | ALKBH1 KO | Random    | 0.576555  |
| 1 mM      | ALKBH1 KO | TTG       | 0.460817  |
| 1 mM      | ALKBH1 KO | TTG       | 0.460831  |
| 1 mM      | ALKBH1 KO | TTG       | 0.499743  |
| 1 mM      | ALKBH1 KO | TTA       | 0.418712  |



|      |           |        |          |
|------|-----------|--------|----------|
| 1 mM | ALKBH1 KO | TTA    | 0.366305 |
| 1 mM | ALKBH1 KO | TTA    | 0.424741 |
| 1 mM | ALKBH1 KO | Random | 0.56367  |
| 1 mM | ALKBH1 KO | Random | 0.514439 |
| 1 mM | ALKBH1 KO | Random | 0.519565 |

## Supplementary Note: Synthetic Protocols and Compound Characterization

|                                                              |     |
|--------------------------------------------------------------|-----|
| General synthetic methods                                    | S66 |
| Synthesis of 5-ethynylcytidine (5-EC) ( <b>3</b> )           | S67 |
| Synthesis of 5-ethynylcytidine phosphoramidite ( <b>11</b> ) | S68 |
| Compound Characterization (NMR and ESI-MS)                   | S76 |

### *General synthetic methods*

Reagents were purchased in the highest available quality from commercial suppliers (Sigma-Aldrich, Chem Genes, Glen Research, Carbo Synth) and used without further purification. All reactions were carried out under argon or nitrogen atmosphere, unless otherwise noted. Analytical thin-layer chromatography (TLC) was performed on Silicycle SiliaPlate Glass Backed TLC Extra Hard Layer 60Å plates. Silica gel 230-400 mesh Grade 60 for column chromatography was purchased from Fischer Scientific.  $^1\text{H}$ ,  $^{13}\text{C}$ , and  $^{31}\text{P}$  spectra were recorded on a Bruker Ultrashield™ 300, 400, or 500 Plus spectrometer. Chemical shifts ( $\delta$ ) are referenced to the residual solvent signal (DMSO- $d_6$ : 2.50 ppm for  $^1\text{H}$  and 39.52 ppm for  $^{13}\text{C}$  spectra;  $\text{CDCl}_3$ : 7.26 ppm for  $^1\text{H}$  and 77.16 ppm for  $^{13}\text{C}$  spectra). The following abbreviations were used to denote multiplicities: s = singlet, d = doublet, t = triplet, q = quadruplet, m = multiplet, b = broad. Mass spectrometric analysis (HRMS) of nucleoside derivatives was performed on an ESI-TOF device. MS analysis of oligonucleotides was performed on an ESI-TOF device in negative mode.

## Synthesis of 5-ethynylcytidine (5-EC) (3)

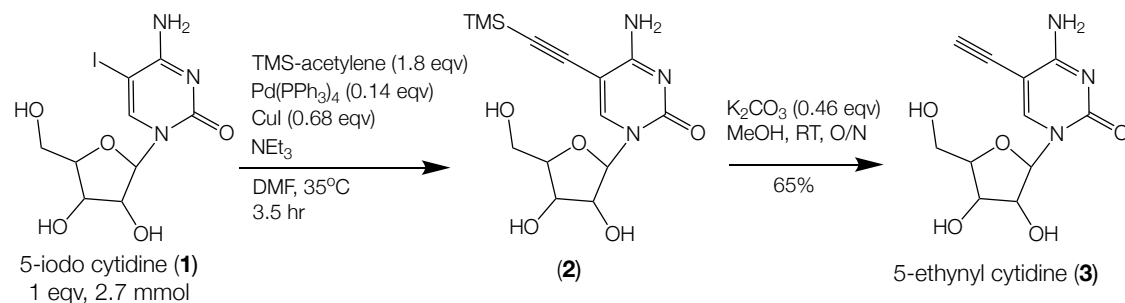

TMS-protected 5-ethynylcytidine (**2**). 5-iodocytidine (**1**, 1 g, 2.7 mmol) was added to a 250 mL round-bottomed flask, and the flask was evacuated and backfilled with inert gas (3x). Anhydrous DMF (44 mL) and anhydrous triethylamine (35 mL) were added via syringe. TMS-acetylene (0.478 g, 1.8 mmol), tetrakis(triphenylphosphine)palladium(0) [Pd(PPh<sub>3</sub>)<sub>4</sub>, 0.483 g, 0.38 mmol], and copper iodide (CuI, 0.348 g, 1.8 mmol), were added under positive pressure of inert gas, and the mixture was stirred for 4.5 hr at 35 °C. Volatiles were evaporated, and the residue was re-dissolved in methanol, filtered through celite, and concentrated *in vacuo*. The crude was purified by column chromatography (silica, 10-25% methanol in DCM) to yield (**2**) as a yellow solid (522 mg, 55%). <sup>1</sup>H NMR (500 MHz, DMSO-d<sub>6</sub>): 0.22 (s, 9H, 3xCH<sub>3</sub>); 3.58 (ddd, 1H, H5'); 3.69 (ddd, 1H, H5''); 3.83 (dt, 1H, H4'); 3.95 (m, 2H, H2' + H3'); 5.00 (d, 1H, 2'-OH); 5.18 (t, 1H, 5'-OH); 5.37 (d, 1H, 3'-OH); 5.75 (d, 1H, H10'); 6.65 (s, br, 1H, NH); 7.80 (s, br, 1H, NH); 8.33 (s, 1H, H8). HRMS ESI-TOF [M+Na]<sup>+</sup> calc: 290.07174, found: 290.07139.

5-ethynylcytidine (**3**). Intermediate **2** (522 mg, 1.54 mmol) was dissolved in anhydrous methanol (15 mL), and potassium carbonate (K<sub>2</sub>CO<sub>3</sub>, 64 mg, 0.46 mmol) was added. The mixture was stirred at room temperature for 16 hours, over the course of which a

fine precipitate was formed. The reaction was vacuum-filtered, and the filter cake was washed with cold methanol. The filtrate was concentrated *in vacuo* and purified by column chromatography (silica, 15-25% methanol in DCM) to yield (**3**) as a light-yellow solid (268 mg, 65%). <sup>1</sup>H NMR (500 MHz, DMSO-d<sub>6</sub>): 3.59 (ddd, 1H, H5'); 3.71 (ddd, 1H, H5''); 3.85 (dt, 1H, H4'); 3.94 (m, 2H, H2' + H3'); 4.35 (s, 1H, CCH); 5.00 (d, 1H, 2'-OH); 5.21 (t, 1H, 5'-OH); 5.39 (d, 1H, 3'-OH); 5.74 (d, 1H, H10'); 6.85 (s, br, 1H, NH); 7.73 (s, br, 1H, NH); 8.38 (s, 1H, H8). <sup>13</sup>C NMR (125 MHz, DMSO-d<sub>6</sub>): 60.36 (C5'), 69.25 (C3'), 70.84 (CCH), 76.32 (C2'), 84.45 (C4'), 86.32 (CCH), 89.29 (C1'), 89.91 (C5), 146.29 (C6), 154.1 (C4), 164.62 (C2). HRMS ESI-TOF [M+Na]<sup>+</sup> calc: 290.07165, found: 290.07474.

### Synthesis of 5-ethynylcytidine (5-EC) phosphoramidite (**11**)

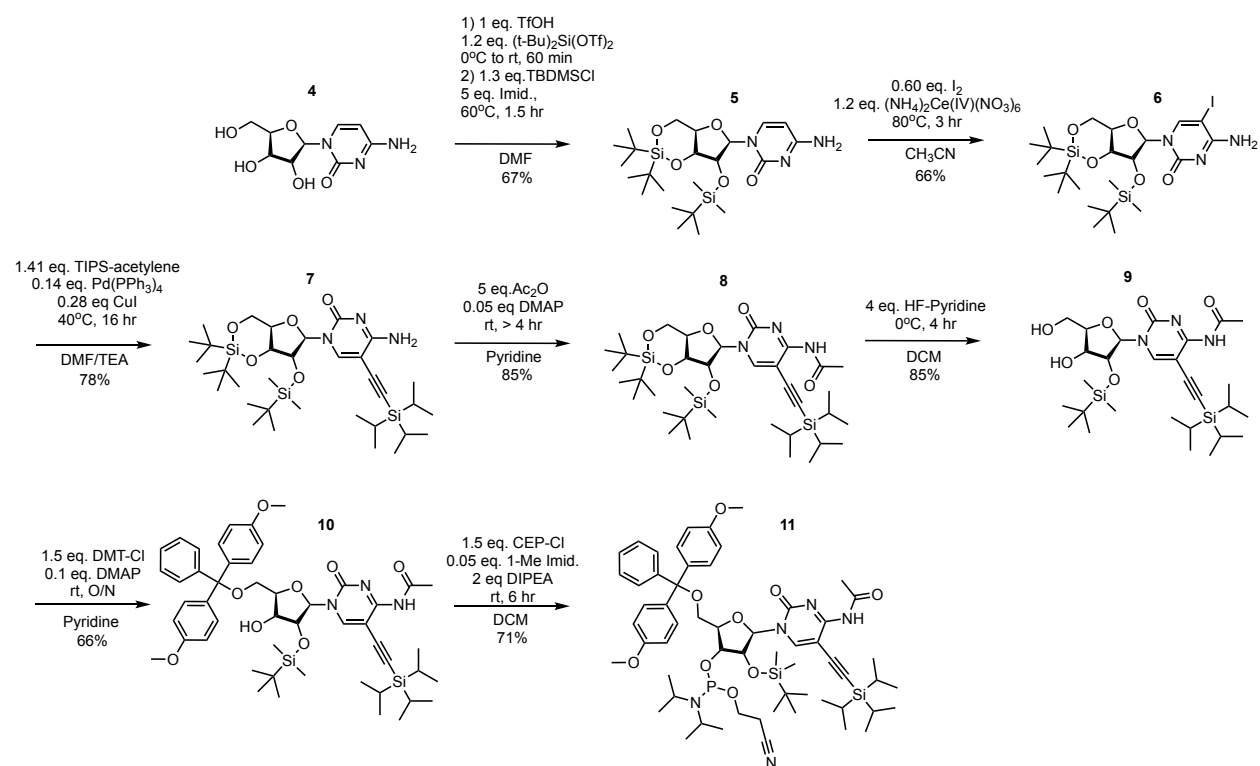

2'-O-(*tert*-butyldimethylsilyl)-3',5'-O-(di-*tert*-butylsilylene)-cytidine (**5**). Cytidine (**4**, 2 g, 8.2 mmol) was dried under high vacuum then dissolved in anhydrous DMF (20 mL) then cooled to 0°C on ice. Then, TfOH (726  $\mu$ L, 1.23 g, 8.2 mmol) was added via a syringe followed (t-Bu)<sub>2</sub>Si(OTf)<sub>2</sub> (3.21 mL, 4.35 g, 9.86 mmol). Reaction progress was monitored by TLC. After 1 hour, the reaction was removed from the ice bath and warmed to rt. Imidazole (2.79 g, 41 mmol) was added and the reaction was heated to 60°C. TBDMS-Cl (1.62 g, 10.6 mmol) was added, and the reaction stirred for an additional 1.5 hours. The reaction was diluted with 200 mL EtOAc and extracted with 200 mL NaHCO<sub>3</sub> (x2) followed by washes with 200 mL H<sub>2</sub>O (x2). The organic layer was dried over Na<sub>2</sub>SO<sub>4</sub> and filtered. The solution was then evaporated and the crude residue purified by SiO<sub>2</sub> column chromatography pre-equilibrated with 0.1% triethylamine in DCM using a 1-4% MeOH in DCM gradient. This afforded compound **5** (2.75 g, 5.53 mmol, 67%) as a white foam once dried under high vacuum. R<sub>f</sub> = 0.44 (7% MeOH in DCM). HR-MS (ESI-TOF) calculated [MH<sup>+</sup>] = 498.2814, observed [MH<sup>+</sup>] = 498.3130. <sup>1</sup>H-NMR (400 MHz, CDCl<sub>3</sub>)  $\delta$  = 0.14 (s, 3H, H<sub>3</sub>C-Si), 0.21 (s, 3H, H<sub>3</sub>C-Si), 0.93 (s, 9H, H<sub>3</sub>C-Si), 1.02 (s, 9H, H<sub>3</sub>C-Si), 1.04 (s, 9H, H<sub>3</sub>C-Si), 3.85 (dd, 1H, H-C(3')), 3.98 (t, 1H, H(a)-C(5')), 4.20 (m, 1H, H-C(4')), 4.29 (d, 1H, H-C(2')), 4.50 (dd, 1H, H(b)-C(5')), 5.67 (s, 1H, H-C(1')), 5.84 (d, 1H, H-C(5)), 7.34 (s, 1H, H-C(6)). <sup>13</sup>C-NMR (126 MHz, CDCl<sub>3</sub>)  $\delta$  = -4.86, -4.30 (2x SiCH<sub>3</sub>), 18.25, 20.34, 22.78 (3x SiC(CH<sub>3</sub>)<sub>3</sub>), 25.94, 27.00, 27.52 (3x SiC(CH<sub>3</sub>)<sub>3</sub>), 67.83 (C(5')), 74.41 (C(4')), 75.29 (C(2')), 75.90 (C(3')), 94.50 (C(1')), 94.87 (C(5)), 140.23 (C(6)), 155.34 (C(2)), 165.74 (C(4)) ppm.

2'-O-(*tert*-butyldimethylsilyl)-3',5'-O-(di-*tert*-butylsilylene)-5-iodocytidine (**6**). Compound **5** (2.73 g, 5.49 mmol) was dissolved in 30 mL anhydrous CAN. I<sub>2</sub> (0.835 g, 3.29 mmol) and ammonium (IV) cerium nitrate (3.61 g, 6.57 mmol) were added, and the reaction was refluxed at 80°C for 3 hr. The reaction was then cooled and diluted with 300 mL EtOAc and extracted twice with 200 mL NaHCO<sub>3</sub> and washed five times with Na<sub>2</sub>S<sub>2</sub>O<sub>3</sub>. The organic layer was dried over Na<sub>2</sub>SO<sub>4</sub>, filtered, evaporated, and dissolved in a small amount of CHCl<sub>3</sub> then purified by silica gel column chromatography (0-5% acetone in CHCl<sub>3</sub>) pre-equilibrated with toluene to afford compound **6** (2.27 g, 3.64 mmol, 66%) as a light-yellow foam. R<sub>f</sub> = 0.656 (10% MeOH in CHCl<sub>3</sub>). HR-MS (ESI-TOF) calculated [MH<sup>+</sup>] = 624.1780, observed [MH<sup>+</sup>] = 624.1226. <sup>1</sup>H-NMR (300 MHz, CDCl<sub>3</sub>) δ = 0.15 (s, 3H, H<sub>3</sub>C-Si), 0.22 (s, 3H, H<sub>3</sub>C-Si), 0.94 (s, 9H, H<sub>3</sub>C-Si), 1.02 (s, 9H, H<sub>3</sub>C-Si), 1.05 (s, 9H, H<sub>3</sub>C-Si), 3.84 (dd, 1H, H-C(3')), 3.98 (t, 1H, H(a)-C(5')), 4.21 (m, 1H, H-C(4')), 4.30 (d, 1H, H-C(2')), 4.52 (dd, 1H, H(b)-C(5')), 5.65 (s, 1H, H-C(1')), 7.66 (s, 1H, H-C(6)). <sup>13</sup>C-NMR (126 MHz, CDCl<sub>3</sub>) δ = -4.82, -4.31 (2x SiCH<sub>3</sub>), 18.21, 20.35, 22.85 (3x SiC(CH<sub>3</sub>)<sub>3</sub>), 25.92, 26.99, 27.50 (3x SiC(CH<sub>3</sub>)<sub>3</sub>), 55.95 (C(5)), 67.84 (C(5')), 74.57 (C(4')), 75.16 (C(2')), 75.72 (C(3')), 94.43 (C(1')), 146.69 (C(6)), 153.94 (C(2)), 163.47 (C(4)) ppm.

2'-O-(*tert*-butyldimethylsilyl)-3',5'-O-(di-*tert*-butylsilylene)-5-((triisopropylsilyl)ethynyl)cytidine (**7**). Compound **6** (2.25 g, 3.6 mmol) was dissolved in 130 mL anhydrous DMF and transferred to a dry 3-neck round bottom flask. The solution was then degassed via three cycles of freeze-pump-thaw under high vacuum. Then, in order, CuI (0.194 g, 1.02 mmol), TIPS-acetylene (0.931 g, 5.11 mmol, 1.29 mL), Pd(PPh<sub>3</sub>)<sub>4</sub> (0.590 g, 0.511 mmol), and 20 mL triethylamine were added. The reaction was

allowed to proceed overnight (~16 hours) at 40°C under a N<sub>2</sub> atmosphere in the dark. The reaction was then diluted with 200 mL EtOAc and washed with 200 mL H<sub>2</sub>O and again with 200 mL 0.5 M EDTA and again with 200 mL brine. The organic layer was dried over Na<sub>2</sub>SO<sub>4</sub>, filtered, and evaporated. The product was dissolved in a small amount of DCM and purified via silica gel column chromatography (1-20% EtOAc in hexane) pre-equilibrated with toluene to afford compound **7** (1.9 g, 2.80 mmol, 78%) as a whitish foam after drying under high vacuum. R<sub>f</sub> = 0.53 (40% EtOAc in hexane). HR-MS (ESI-TOF) calculated [MH<sup>+</sup>] = 678.4148, observed [MH<sup>+</sup>] = 678.4379. <sup>1</sup>H-NMR (400 MHz, CDCl<sub>3</sub>) δ = 0.15 (s, 3H, H<sub>3</sub>C-Si), 0.22 (s, 3H, H<sub>3</sub>C-Si), 0.94 (s, 9H, H<sub>3</sub>C-Si), 1.02 (s, 9H, H<sub>3</sub>C-Si), 1.04 (s, 9H, H<sub>3</sub>C-Si), 1.10 (d, 18H, H<sub>3</sub>C-Si), 3.87 (dd, 1H, H-C(3')), 3.99 (t, 1H, H(a)-C(5')), 4.23 (m, 1H, H-C(4')), 4.28 (d, 1H, H-C(2')), 4.55 (dd, 1H, H(b)-C(5')), 5.71 (s, 1H, H-C(1')), 7.57 (s, 1H, H-C(6)). <sup>13</sup>C-NMR (126 MHz, CDCl<sub>3</sub>) δ = -4.86, -4.35 (2x SiCH<sub>3</sub>), 11.14 (3x SiC(CH<sub>3</sub>)<sub>2</sub>), 18.22, 18.65 (3x SiC(CH<sub>3</sub>)<sub>2</sub>), 20.33, 22.84, 25.92, 26.96, 27.49 (3x SiC(CH<sub>3</sub>)<sub>3</sub>), 67.79 (C(5')), 74.55 (C(4')), 75.32 (C(2')), 75.62 (C(3')), 91.29 (C(1')), 94.23 (C(8)), 97.41 (C(5)), 98.02 (C(7)), 143.57 (C(6)), 153.57 (C(2)), 164.36 (C(4)) ppm.

N<sup>4</sup>-Acetyl-5-((triisopropylsilyl)ethynyl)-3',5'-di-*O*-*tert*-butylsilyl-2'-*O*-*tert*-butyldimethylsilylcytidine (**8**). Compound **7** (1.9 g, 2.80 mmol) and DMAP (17.1 mg, 0.140 mmol) were dissolved in 28.6 mL anhydrous pyridine. Ac<sub>2</sub>O (1.43 g, 14.0 mmol, 1.33 mL) was added, and the reaction proceeded overnight at rt. The solution was diluted with 75 mL DCM and washed with 100 mL 50% NaHCO<sub>3</sub> then twice with 100 mL of 5% citric acid, once with 100 mL H<sub>2</sub>O, and once with 100 mL brine. The organic layer was dried over Na<sub>2</sub>SO<sub>4</sub>, filtered, evaporated, dissolved in a few mL of hexane/DCM, and purified by silica

gel column chromatography (0-10% EtOAc in hexane) pre-equilibrated with toluene to yield **8** (1.71 g, 2.38 mmol, 85%) as a light orange foam once dried under high vacuum.  $R_f = 0.69$  (20% EtOAc in hexane). HR-MS (ESI-TOF) calculated  $[MH^+] = 720.4254$ , observed  $[MH^+] = 720.4405$ .  $^1H$ -NMR (400 MHz,  $CDCl_3$ )  $\delta = 0.17$  (s, 3H,  $H_3C-Si$ ), 0.26 (s, 3H,  $H_3C-Si$ ), 0.96 (s, 9H,  $H_3C-Si$ ), 1.03 (s, 9H,  $H_3C-Si$ ), 1.07 (s, 9H,  $H_3C-Si$ ), 1.12 (d, 18H,  $H_3C-Si$ ), 2.35 (s, 3H,  $(H_3C)CO$ ), 3.82 (dd, 1H, H-C(3')), 3.99 (t, 1H, H(a)-C(5')), 4.33 (m, 1H, H-C(4')), 4.36 (d, 1H, H-C(2')), 4.59 (dd, 1H, H(b)-C(5')), 5.69 and 5.75 (s, 1H, H-C(1')), 7.78 and 7.99 (s, 1H, H-C(6)).  $^{13}C$ -NMR (126 MHz,  $CDCl_3$ )  $\delta = -4.93, -4.18$  (2x  $SiCH_3$ ), 11.14 (3x  $SiC(CH_3)_2$ ), 18.52, 18.62 (3x  $SiC(CH_3)_2$ ), 20.36, 22.80, 25.89, 26.95, 27.49 (3x  $SiC(CH_3)_3$ ), 26.11 ( $COCH_3$ ), 67.64 (C(5')), 75.03 (C(4')), 75.21 (C(2')), 75.61 (C(3')), 94.75 (C(1')), 95.84 (C(8)), 98.59 (C(5)), 101.82 (C(7)), 147.26 (C(6)), 152.83 (C(2)), 166.93 (C(4)), 170.75 ( $COCH_3$ ) ppm.

**N<sup>4</sup>-Acetyl-5-((triisopropylsilyl)ethynyl)-2'-O-tert-butyl dimethylsilylcytidine (9)**. Compound **8** (1.71 g, 2.38 mmol) was dissolved in 50 mL anhydrous DCM and cooled to 0°C. HF-pyridine (0.19 g, 9.51 mmol, 247  $\mu$ L) was carefully mixed with 741  $\mu$ L anhydrous pyridine in a microfuge tube and added to the reaction dropwise. Reaction progress was monitored by TLC (30% EtOAc in hexane) and showed a complete conversion of the starting material at 4 hours. The reaction was then diluted with 200 mL  $CHCl_3$  and washed with 100 mL  $Na_2CO_3$ . The organic layer was dried over  $Na_2SO_4$  and evaporated then dissolved in hexane/DCM and purified by silica gel column chromatography (10-15% EtOAc in hexane) which gave **9** (1.17 g, 2.02 mmol, 85%).  $R_f = 0.41$  (30% EtOAc in hexane). HR-MS (ESI-TOF) calculated  $[MH^+] = 580.3233$ , observed  $[MH^+] = 580.3377$ .  $^1H$ -NMR (500



MHz, CDCl<sub>3</sub>  $\delta$  = 0.16 (s, 3H, H<sub>3</sub>C-Si), 0.23 (s, 3H, H<sub>3</sub>C-Si), 0.92 (s, 9H, (H<sub>3</sub>C)<sub>3</sub>C-Si), 1.05 (d, 18H, (H<sub>3</sub>C)<sub>2</sub>C-Si), 2.34 (s, 3H, (H<sub>3</sub>C)CO), 3.90 (dd, 1H, H-C(3')), 4.10 (t, 1H, H(b)-C(5')), 4.23 (m, 1H, H-C(4')), 4.44 (d, 1H, H-C(2')), 4.53 (dd, 1H, H(a)-C(5')), 5.59 and 5.76 (s, 1H, H-C(1')), 8.44 and 8.90 (s, 1H, H-C(6)). <sup>13</sup>C-NMR (126 MHz, CDCl<sub>3</sub>)  $\delta$  = -5.33, -4.47 (2x SiCH<sub>3</sub>), 11.06 (3x SiC(CH<sub>3</sub>)<sub>2</sub>), 18.08 (3x SiC(CH<sub>3</sub>)<sub>2</sub>), 18.63 (SiC(CH<sub>3</sub>)<sub>3</sub>), 25.82 (COCH<sub>3</sub>), 26.09 (SiC(CH<sub>3</sub>)<sub>3</sub>), 60.29 (C(5')), 68.39 (C(4')), 74.84 (C(2')), 85.02 (C(3')), 93.22 (C(1')), 93.99 (C(8)), 98.11 (C(5)), 101.07 (C(7)), 147.77 (C(6)), 150.30 (C(4)), 153.37 (C(2)), 170.66 (COCH<sub>3</sub>) ppm.

N<sup>4</sup>-Acetyl-5-((triisopropylsilyl)ethynyl)-5'-O-(4,4'-dimethoxytrityl)-2'-O-*tert*-

butyldimethylsilylcytidine (**10**). Compound **9** (1.17 g, 2.02 mmol) was dissolved in 30 mL anhydrous pyridine. DMT-Cl (1.03 g, 3.03 mmol) was added in portions over approximately 1 hour. DMAP (0.109 mmol, 13.3 mg) was added with the first portion of DMT-Cl. An additional 0.05 eq. DMAP (0.111 mmol, 13.5 mg) was added after 3 hours, and the reaction proceeded overnight. The solution was then diluted with 200 mL EtOAc and washed three times with 100 mL 5% citric acid, once with 200 mL NaHCO<sub>3</sub>, once with 200 mL H<sub>2</sub>O, and once with 200 mL brine. The organic layer was then dried over Na<sub>2</sub>SO<sub>4</sub>. The crude product was dissolved in CHCl<sub>3</sub> and purified by silica column chromatography (5-15% EtOAc in hexane) pre-equilibrated with toluene to afford **10** as a white foam (1.17 g, 1.33 mmol, 66%). R<sub>f</sub> = 0.63 (30% EtOAc in hexane). HR-MS (ESI-TOF) calculated [MH<sup>+</sup>] = 882.4539, observed [MH<sup>+</sup>] = 882.4735. <sup>1</sup>H-NMR (300 MHz, DMSO-d<sub>6</sub>)  $\delta$  = 0.08 (s, 3H, H<sub>3</sub>C-Si), 0.10 (s, 3H, H<sub>3</sub>C-Si), 0.88 (s, 9H, (H<sub>3</sub>C)<sub>3</sub>C-Si), 0.93 (d, 18H, (H<sub>3</sub>C)<sub>2</sub>C-Si), 2.37 (s, 3H, (H<sub>3</sub>C)CO), 3.21 (dd, 1H, H(a)-C(5')), 3.36 (t, 1H, H(b)-

C(5')), 3.74 (s, 6H, OCH<sub>3</sub>), 3.98 (dd, 1H, H-C(3')), 4.09 (m, 1H, H-C(4')), 4.29 (d, 1H, H-C(2')), 5.09 (d, 1H, HO-C(3')), 5.77 (s, 1H, H-C(1')), 6.90 (d, 4H, H-C(ar)), 7.22-7.42 (m, 9H, H-C(ar)), 8.25 (s, 1H, H-C(6)), 9.11 (s, 1H, H-N(4)). <sup>13</sup>C-NMR (126 MHz, DMSO-d<sub>6</sub>) δ = -4.51, -4.31 (2x SiCH<sub>3</sub>), 11.01 (3x SiC(CH<sub>3</sub>)<sub>2</sub>), 18.71 (3x SiC(CH<sub>3</sub>)<sub>2</sub>), 18.75 (SiC(CH<sub>3</sub>)<sub>3</sub>), 25.41 (COCH<sub>3</sub>), 26.20 (SiC(CH<sub>3</sub>)<sub>3</sub>), 55.44 (2x OCH<sub>3</sub>), 60.23 (CH<sub>2</sub>C(5)), 63.12 (C(5')), 69.32 (C(3')), 76.45 (C(2')), 83.06 (C(4')), 86.19 (tert. C(DMT)), 91.67 (C(1')), 94.22 (C(8)), 98.48 C(5)), 100.94 (C(7)), 113.65 (C(ar)), 127.11 (C(ar)), 128.32 (C(ar)), 129.38 (C(ar)), 129.96 (C(ar)), 130.12 (C(ar)), 135.81 (C(ar)), 136.02 (2x C(ar)-O), 145.12 (C(ar)), 146.68 (C(6)), 152.90 (C(2)), 158.56 (C(ar)), 161.52 (C(4)), 170.87 (COCH<sub>3</sub>) ppm.

*N*<sup>4</sup>-Acetyl-5-((triisopropylsilyl)ethynyl)-5'-O-(4,4'-dimethoxytrityl)-2'-O-*tert*-butyldimethylsilyl cytidine-3'-O-2-cyanoethyl-*N,N*-diisopropylphosphoramidite (**11**). Compound **10** (1.17 g, 2.02 mmol) was dissolved in 30 mL anhydrous DCM. DIPEA (0.343 g, 2.65 mmol, 464 μL) was then added followed by CEP-Cl (0.471 g, 1.99 mmol, 444 μL) and 1-me imidazole (5.45 mg, 6.64 x 10<sup>-5</sup> mol, 34 μL of a 16% solution in THF). The reaction stirred at rt for approximately 6 hours before being diluted with 200 mL CHCl<sub>3</sub> and washed once with 200 mL 50% NaHCO<sub>3</sub>. The organic layer was dried over Na<sub>2</sub>SO<sub>4</sub>, evaporated, and the crude product was kept under high vacuum overnight. The crude product was dissolved in DCM and purified by silica gel chromatography (0% then 5% acetone in DCM) pre-equilibrated with 0.1% TEA in DCM. Purification afforded the final product **11** (1.56 g, 1.44 mmol, 71%) as a light yellow foam once dried under high vacuum. Product was aliquoted in 30 mg portions and stored in ABI oligosynthesizer vials under nitrogen at -20°C for use in oligosynthesis. R<sub>f</sub> = 0.18 (25% EtOAc in hexane). HR-MS

(ESI-TOF) calculated  $[MH^+] = 1,082.5618$ , observed  $[MH^+] = 1,082.5611$ .  $^1H$ -NMR (400 MHz, DMSO- $d_6$ )  $\delta = 0.08$  (s, 6H,  $H_3C$ -Si), 0.88 (s, 9H,  $(H_3C)_3C$ -Si), 0.95 (d, 18H,  $(H_3C)_2C$ -Si), 1.07-1.13 (m, 12H,  $(H_3C)_2$ -CH), 2.33 (s, 3H,  $(H_3C)CO$ ), 2.78 (t, 2H,  $H_2C$ -CN), 3.23 (m, 2H,  $(H_3C)_2$ -CH), 3.54 (m, 4H,  $H_2$ -C(5')), 3.76 (s, 6H,  $OCH_3$ ), 4.08 (m, 2H, H-C(4'), H-C(3')), 4.31 (m, 1H, H-C(2')), 5.87-5.99 (dd, t, 1H, H-C(1')), 6.89 (m, 4H, H-C(ar)), 7.32-7.44 (m, 9H, H-C(ar)), 8.29-8.59 (dd, H-C(6)), 9.20 (d, 1H, H-N(4)).  $^{13}C$ -NMR (126 MHz,  $CD_3CN$ )  $\delta = -4.93$ ,  $-4.72$  (2x  $SiCH_3$ ), 11.41 (3x  $SiC(CH_3)_2$ ), 20.44 ( $SiC(CH_3)_3$ ), 20.60 ( $CH_2CN$ ), 24.47 (2x  $N(iPr)$ ), 25.77 ( $COCH_3$ ), 26.16 ( $SiC(CH_3)_3$ ), 43.64 (2x  $NC(CH_3)_2$ ), 55.44 (2x  $OCH_3$ ), 58.54 ( $CH_2C(5)$ ), 59.38 (C(5')), 72.86 (C(3')), 76.17 (C(2')), 83.68 (C(4')), 87.30 (tert. C(DMT)), 91.15 (C(1')), 96.36 (C(8)), 101.01 (C(5)), 102.23 (C(7)), 113.75 (C(ar)), 118.78 (CN), 127.53 (C(ar)), 128.57 (C(ar)), 129.57 (C(ar)), 130.53 (C(ar)), 130.62 (C(ar)), 136.09 (C(ar)), 136.31 (2x C(ar)-O), 145.67 (C(ar)), 148.68 (C(6)), 153.98 (C(2)), 159.29 (C(ar)), 160.63 (C(4)), 171.28 ( $COCH_3$ ) ppm.  $^{31}P$ -NMR (162 MHz, DMSO- $d_6$ )  $\delta = 148.57$ , 148.77 ppm.

**Spectral characterization data for 5-EC (3).** (A)  $^1\text{H}$  (500 MHz,  $\text{DMSO-d}_6$ ) and APT  $^{13}\text{C}$  (126 MHz,  $\text{DMSO-d}_6$ ) NMR spectra of 5-EC. (B) Positive mode high-resolution mass spectrum (HRMS) for 5-EC. The  $\text{Na}^+$  ion is detected instead of the  $\text{H}^+$  ion.

**A**

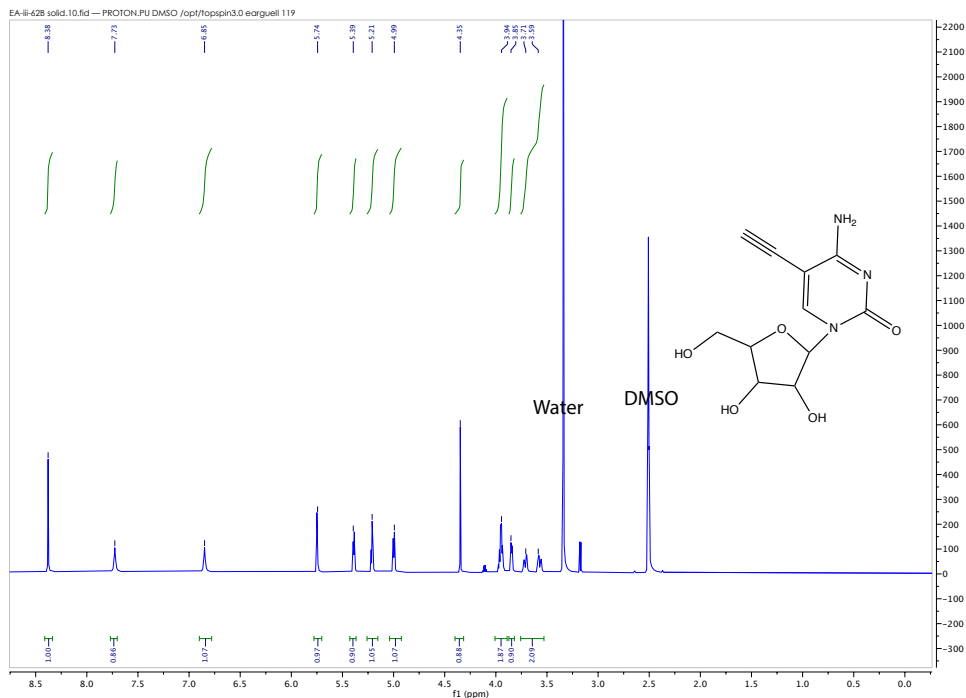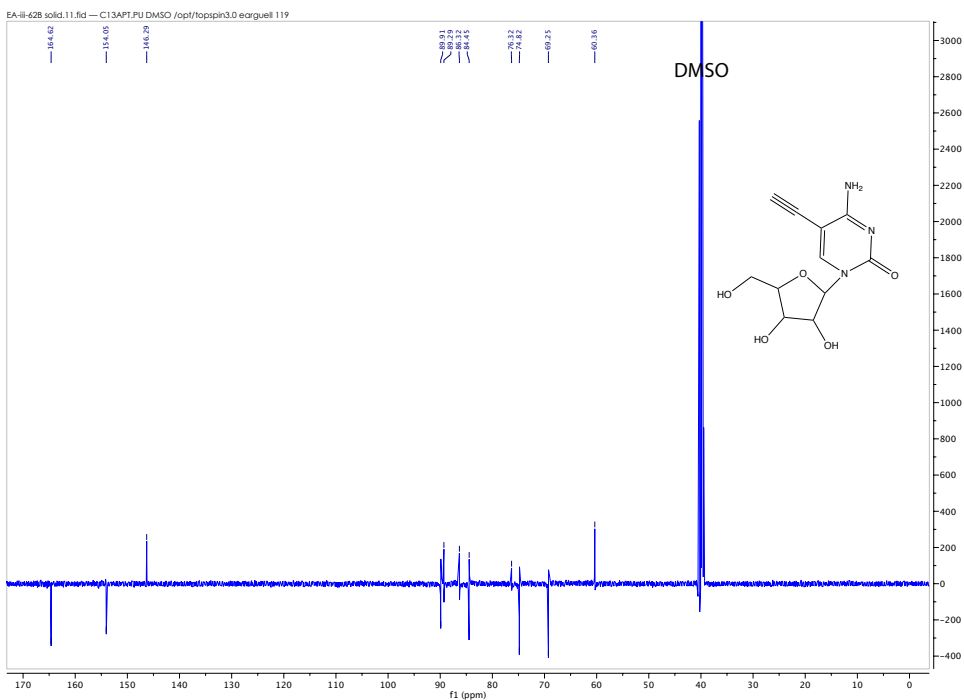

B

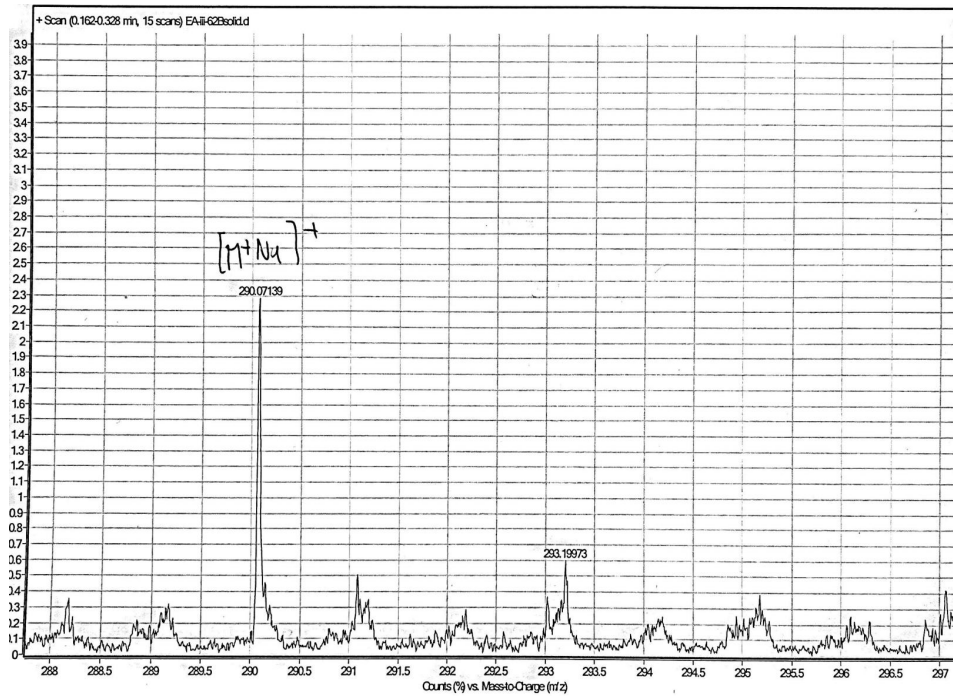

**Spectral characterization of 5. (A)**  $^1\text{H}$  (500 MHz,  $\text{CDCl}_3$ ) NMR and **(B)** APT  $^{13}\text{C}$  (126 MHz,  $\text{CDCl}_3$ )

**A**

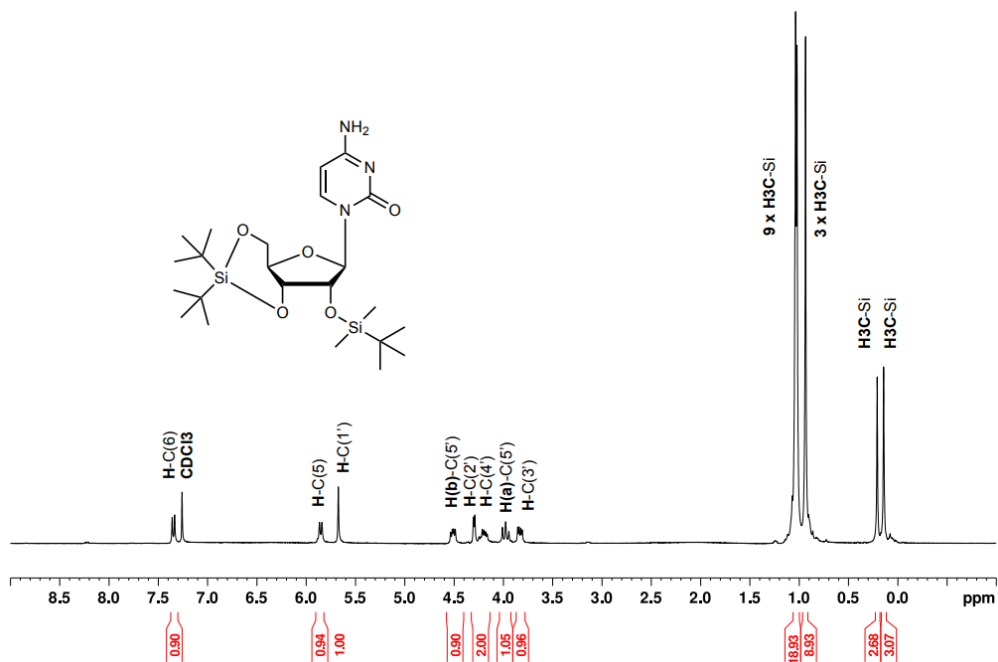

**B**

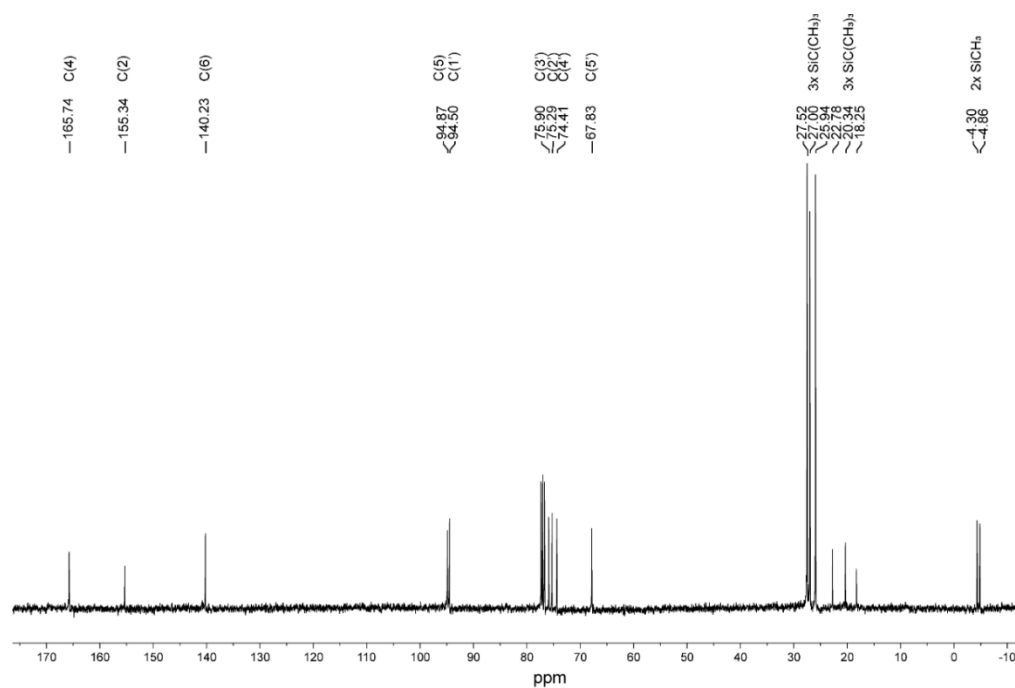

**Spectral characterization of 6. (A)**  $^1\text{H}$  (500 MHz,  $\text{CDCl}_3$ ) NMR and **(B)** APT  $^{13}\text{C}$  (126 MHz,  $\text{CDCl}_3$ )

**A**

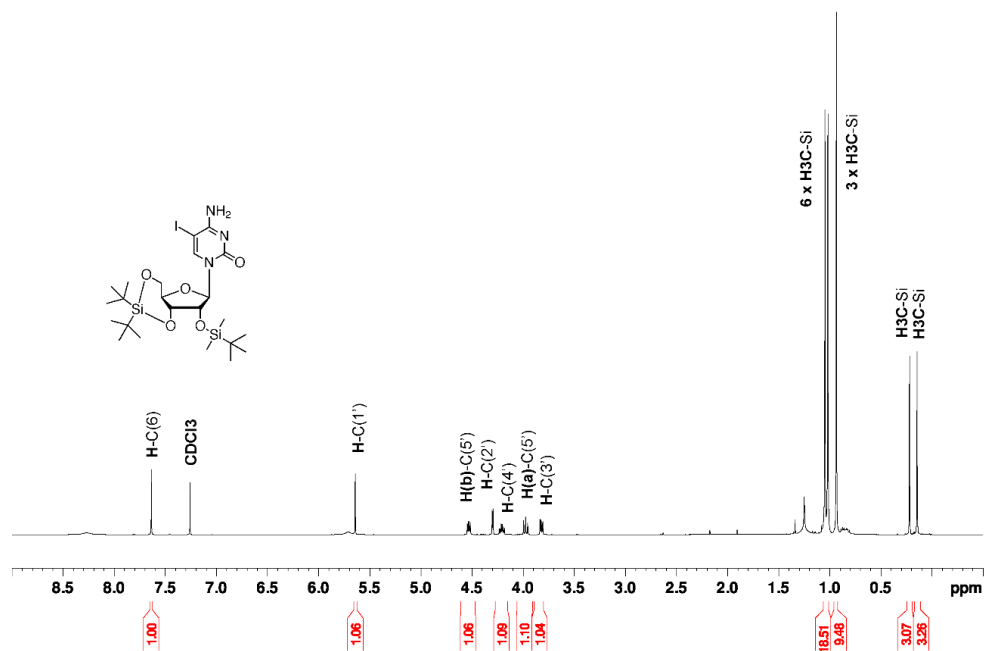

**B**

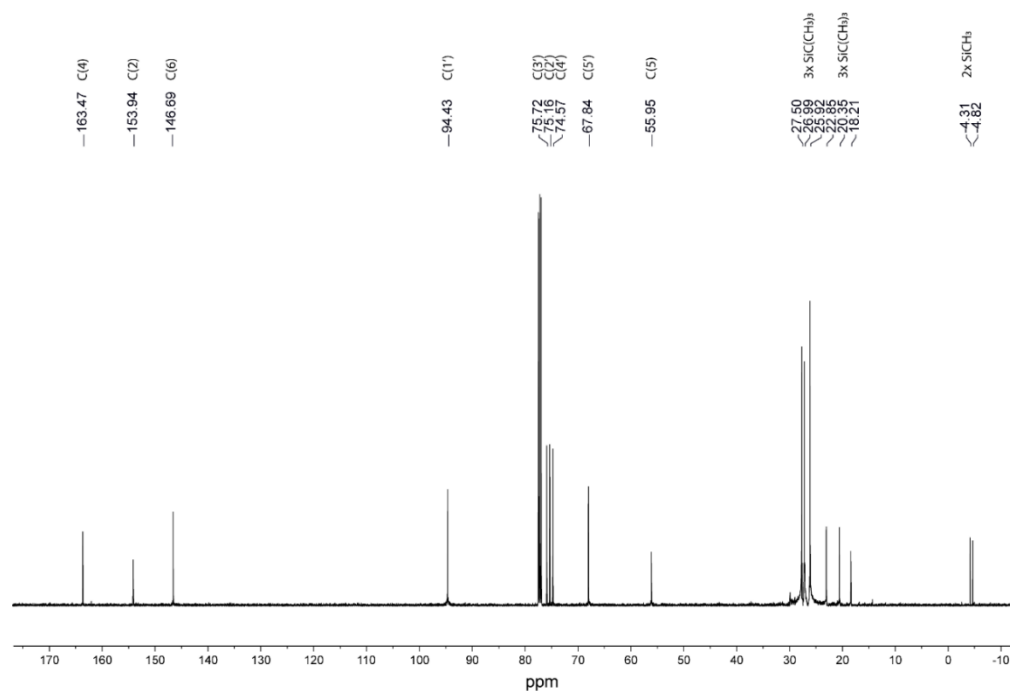





**Spectral characterization of 8. (A)**  $^1\text{H}$  (500 MHz,  $\text{CDCl}_3$ ) NMR and **(B)** APT  $^{13}\text{C}$  (126 MHz,  $\text{CDCl}_3$ )

**A**

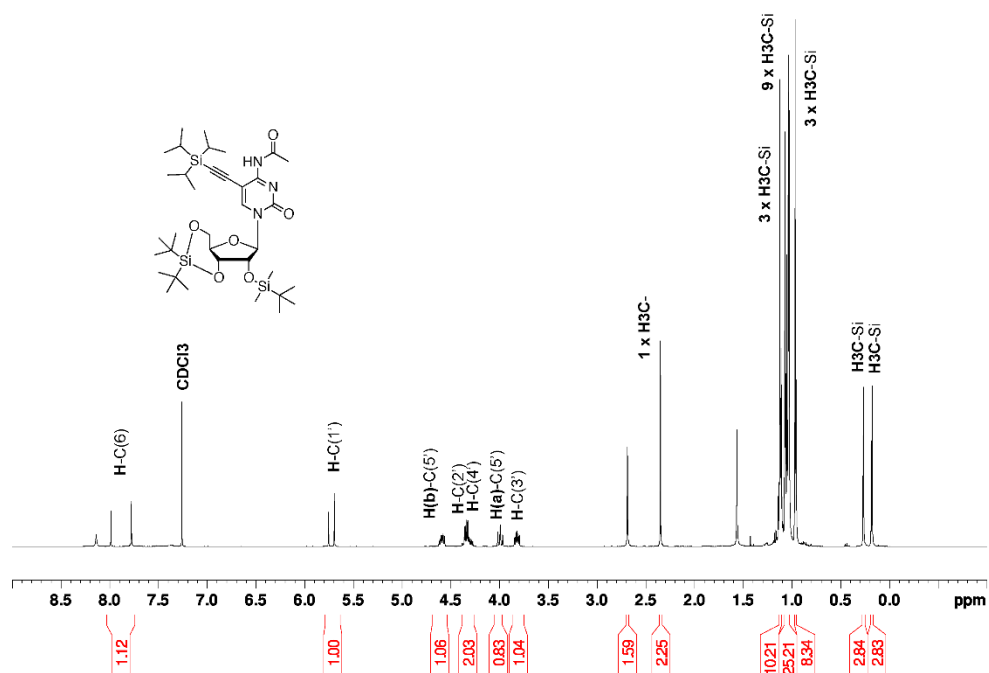

**B**

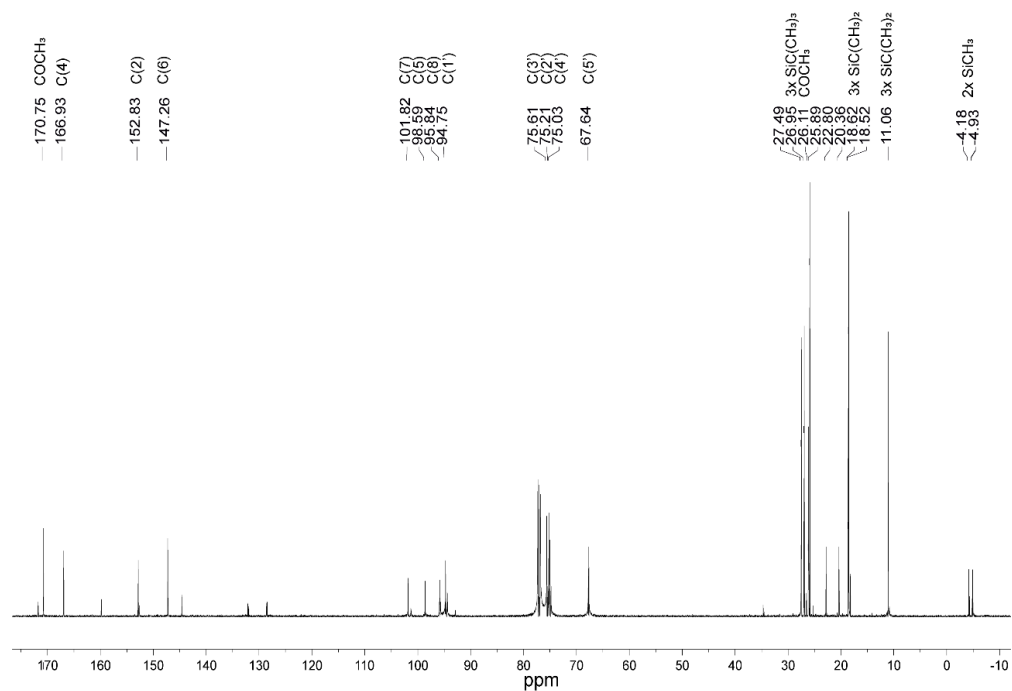

**Spectral characterization of 9. (A)**  $^1\text{H}$  (500 MHz,  $\text{CDCl}_3$ ) NMR and **(B)** APT  $^{13}\text{C}$  (126 MHz,  $\text{CDCl}_3$ )

**A**

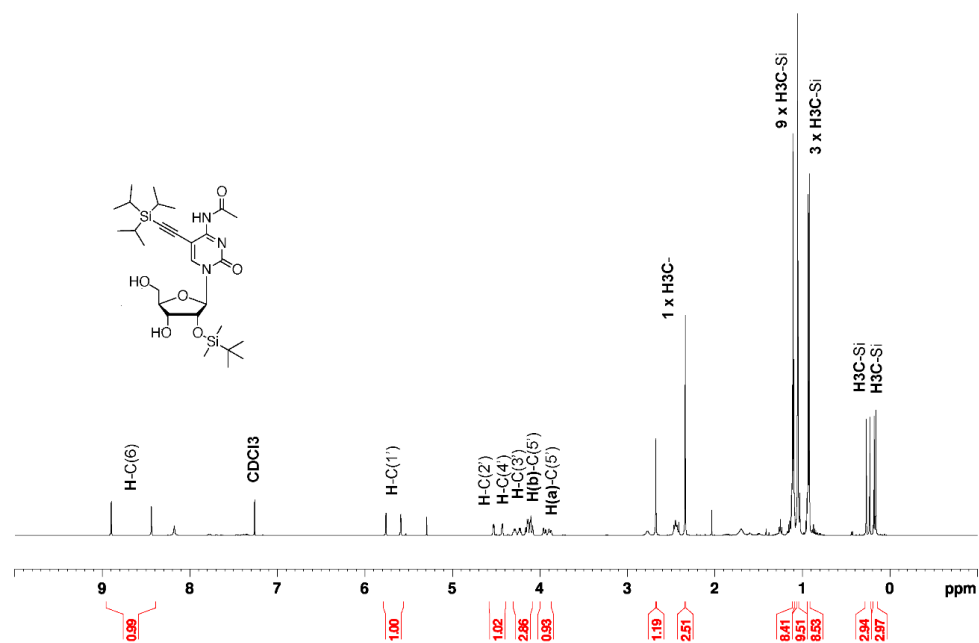

**B**

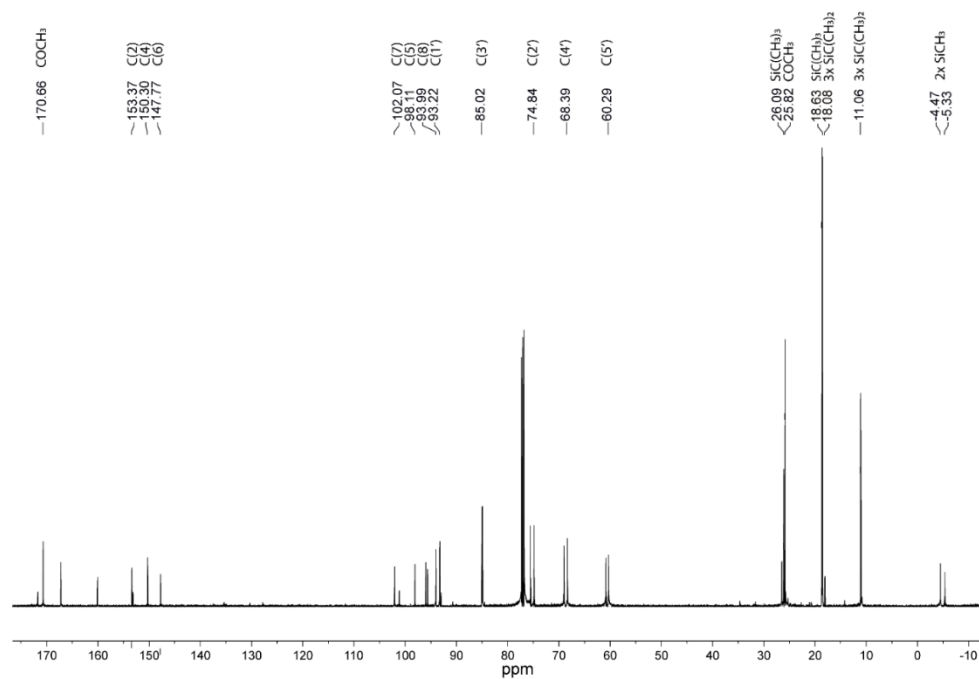



**Spectral characterization of 11. (A)**  $^1\text{H}$  (500 MHz, DMSO- $d_6$ ) NMR, **(B)** APT  $^{13}\text{C}$  NMR (126 MHz,  $\text{CD}_3\text{CN}$ ) and **(C)**  $^{31}\text{P}$  (162 MHz, DMSO- $d_6$ ) NMR spectra.

**A**

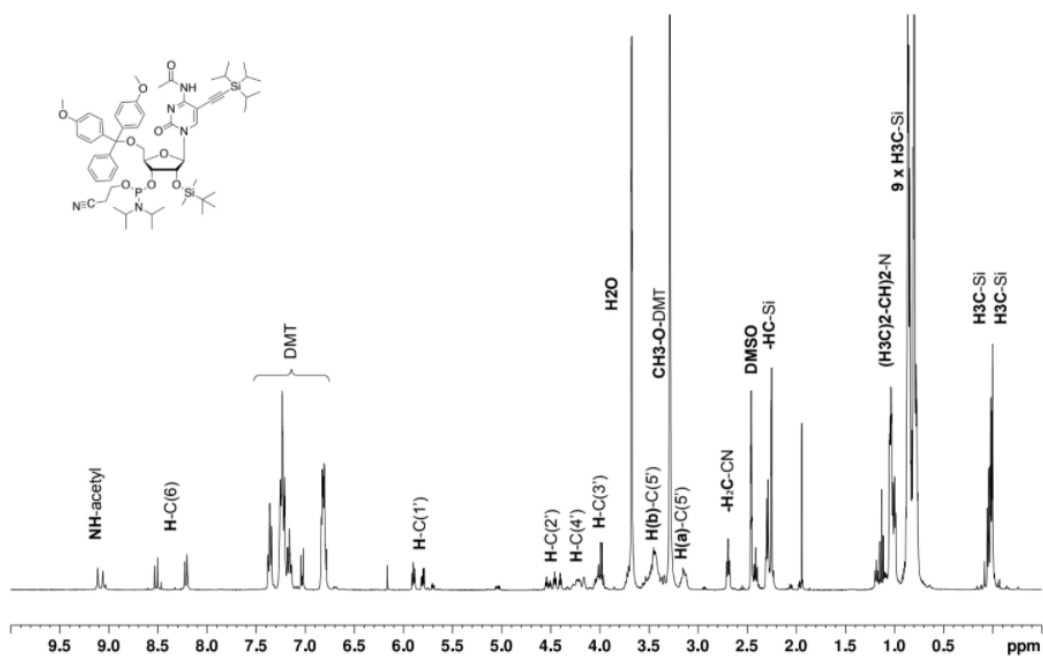

**B**

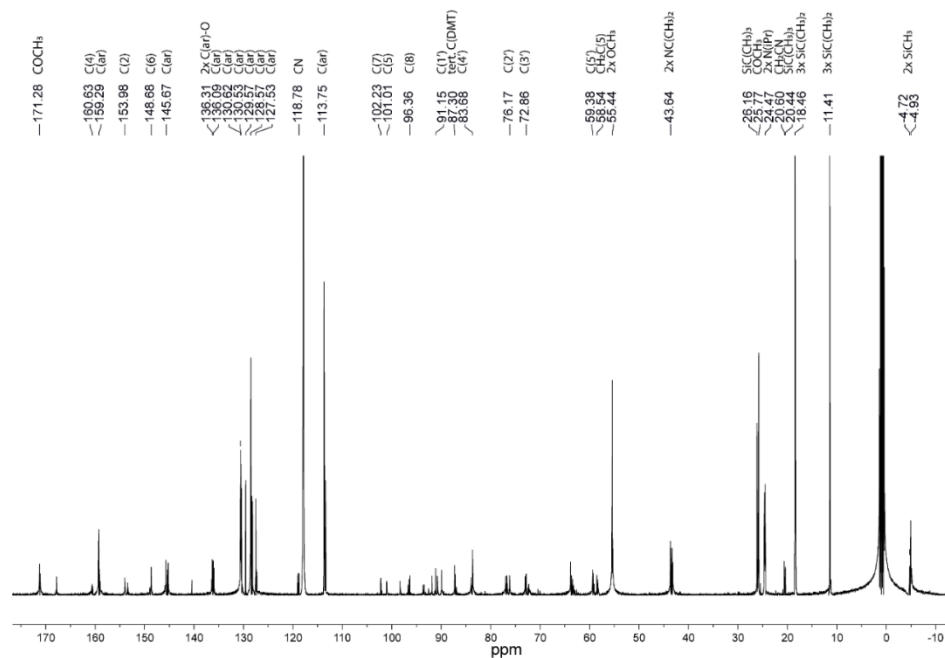

C

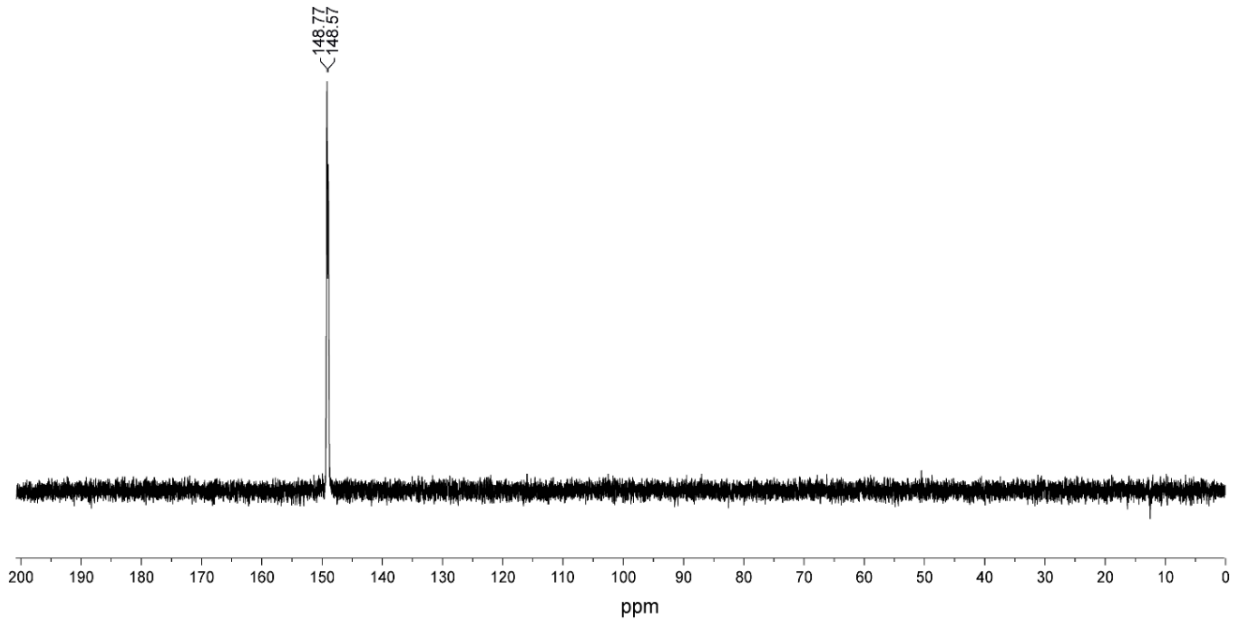

**References:**

1. Li, X.; Xiong, X.; Wang, K.; Wang, L.; Shu, X.; Ma, S.; Yi, C., Transcriptome-wide mapping reveals reversible and dynamic N(1)-methyladenosine methylome. *Nat Chem Biol* 2016, 12 (5), 311-6.
