# Supplementary material for: Reactivity-dependent profiling of RNA 5-methylcytidine dioxygenases
Source: PubMed Central journal article supplement (PMC9296451; doi:10.1038/s41467-022-31876-2), 2022-07-19
Supplement: 41467_2022_31876_MOESM2_ESM.pdf [file 41467_2022_31876_MOESM2_ESM.pdf]

### **Description of Additional Supplementary Files**

File Name: Supplementary Data 1

Description: 5-EC RNABPP proteomics data

File Name: Supplementary Data 2

Description: 5-EC iCLIP data

File Name: Supplementary Data 3

Description: ARP sequencing data

File Name: Supplementary Data 4

Description: Pyridine borane sequencing data.
